# Supplementary material
Source: MDPI journal article supplement (https://www.mdpi.com/2073-4344/12/7/790)
Supplement: s1 [file s1]

## Insights into the Capture of CO<sub>2</sub> by Nickel Hydride Complexes

Min Zhang<sup>1</sup>, Xiaoqing Liang<sup>1</sup>, Yaozheng Wang<sup>2</sup>, Hongyu Yang<sup>3</sup>, Guangchao Liang<sup>3,\*</sup>

<sup>1</sup> Department of Pharmacy, School of Medicine, Xi'an International University, Xi'an, Shaanxi 710077, P.R. China

<sup>2</sup> College of Information Management, Minnan University of Science and Technology, Quanzhou, Fujian 362700, P.R. China

<sup>3</sup> Academy of Advanced Interdisciplinary Research, Xidian University, Xi'an, Shaanxi 710071, P.R. China

Correspondence: [liangguangchao@xidian.edu.cn](mailto:liangguangchao@xidian.edu.cn)

### Table of Contents

|                                                                                                                                                                          |     |
|--------------------------------------------------------------------------------------------------------------------------------------------------------------------------|-----|
| Table S1. The matched DFT optimized structure with the reported X-ray crystal structure.....                                                                             | S2  |
| Scheme S1. Equation used to calculate the hydricity. ....                                                                                                                | S2  |
| Scheme S2. The multi-parameter models for the $\Delta G^\ddagger$ of RDS for TM-H complexes I to VII. ....                                                               | S3  |
| Figure S1. Free energy diagram for CO <sub>2</sub> insertion into I, <sup>t</sup> Bu <sup>2</sup> (PCP)Ni-H.....                                                         | S3  |
| Figure S2. Free energy diagram for proton transfer from the Ni-H to the CO <sub>2</sub> . ....                                                                           | S4  |
| Figure S3. Free energy diagram for formate pathway and CO pathway with I, <sup>t</sup> Bu <sup>2</sup> (PCP)Ni-H..                                                       | S4  |
| Figure S4. Free energy diagram for CO <sub>2</sub> insertion into TM-H. ....                                                                                             | S5  |
| Table S2. The AIM analysis of the optimized structure 3, M-(H)-formate. ....                                                                                             | S6  |
| Table S3. The first three NAdOs in structure 3, TM-(H)-formate.....                                                                                                      | S7  |
| Figure S5. The representations of 3D and 2D steric maps of TM-H. ....                                                                                                    | S9  |
| Table S4. The steric map of optimized TM-H and [TM] <sup>+</sup> . ....                                                                                                  | S9  |
| Figure S6. The linear fitting between the $\Delta G^\ddagger$ of RDS for TM-H complexes I to VII and the APT charges of TM atoms in the related [TM] <sup>+</sup> . .... | S11 |
| Figure S7. The fitting between the $\Delta G^\ddagger$ of RDS for TM-H complexes I to VII and the computed hydricities.....                                              | S12 |
| Figure S8. IRC plots for TS-2-3. ....                                                                                                                                    | S12 |
| Figure S9. IRC plots for TS-3-4i. ....                                                                                                                                   | S13 |
| Figure S10. IRC plots for TS-4i-4. ....                                                                                                                                  | S13 |
| Figure S11. IRC plots for TS-2-5. ....                                                                                                                                   | S14 |
| Table S5. DFT computed energies for species in Chart 2 at 1 atm and 298.15 K.....                                                                                        | S14 |
| Table S6. Cartesian coordinates of optimized species.....                                                                                                                | S16 |

**Table S1.** The matched DFT optimized structure with the reported X-ray crystal structure. All non-hydrogen atoms are used to calculate the RMSD (in Å), X-ray crystal structures are presented in green.

|                                                                                                                                                                                                                        |                                                                                                                                                                                                                                 |
|------------------------------------------------------------------------------------------------------------------------------------------------------------------------------------------------------------------------|---------------------------------------------------------------------------------------------------------------------------------------------------------------------------------------------------------------------------------|
| 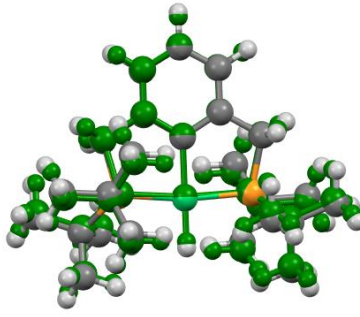 <p><b>I, [Ni<sup>II</sup>]-H</b><br/> <b>RMSD = 0.1680</b><br/> CSD entry: SURZIP<br/> B3LYP-D3(BJ)/BS1 Optimized</p>                |  <p><b>I, [Ni<sup>II</sup>]-O-formate</b><br/> <b>RMSD = 0.1240</b><br/> CSD entry: UMAPAA</p>                                                |
|  <p><b>I, [Ni<sup>II</sup>]-H</b><br/> <b>RMSD = 0.0921</b><br/> CSD entry: SURZIP<br/> SMD(THF)-B3LYP-D3(BJ)/BS2<br/> Optimized</p> |  <p><b>I, [Ni<sup>II</sup>]-O-formate</b><br/> <b>RMSD = 0.0886</b><br/> CSD entry: UMAPAA<br/> SMD(THF)-B3LYP-D3(BJ)/BS2<br/> Optimized</p> |

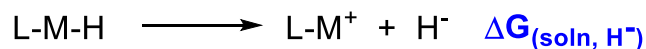

$$\begin{aligned} \Delta G_{(\text{soln}, \text{H}^-)} = & (E_{(\text{soln}, \text{H}^-)} - E_{(\text{gas}, \text{H}^-)}) + (E_{(\text{soln}, \text{L-M}^+)} - E_{(\text{gas}, \text{L-M}^+)}) \\ & - (E_{(\text{soln}, \text{L-M-H})} - E_{(\text{gas}, \text{L-M-H})}) + (G_{(\text{gas}, \text{H}^-)} + G_{(\text{gas}, \text{L-M}^+)}) \\ & - G_{(\text{gas}, \text{L-M-H})} \end{aligned}$$

**Scheme S1.** Equation used to calculate the hydricity.

$$\Delta G_{(\text{RDS})}^{\ddagger} = \text{APT}_{(\text{M}^+)} (29.02) + \%V_{\text{Bur}(\text{M}^+)} (-0.22) + 29.71 \quad \text{Eq. 1b}$$

$$R^2 = 0.8269$$

$$\Delta G_{(\text{RDS})}^{\ddagger} = \text{APT}_{(\text{M}^+)} (-17.17) + \%V_{\text{Bur}(\text{M}^+)} (0.65) \quad \text{Eq. 2b}$$

$$+ \Delta G_{(\text{H}^-)} (0.87) - 79.49$$

$$R^2 = 0.9578$$

**Scheme S2.** The multi-parameter models for the  $\Delta G^{\ddagger}$  of RDS for TM–H complexes **I** to **VII**. In Eq. 1b and 2b, APT is APT charge of Ni atom in the axially vacant  $[\text{TM}]^+$ ,  $\%V_{\text{Bur}}$  is the percentages of buried volume in axially vacant  $[\text{TM}]^+$ .

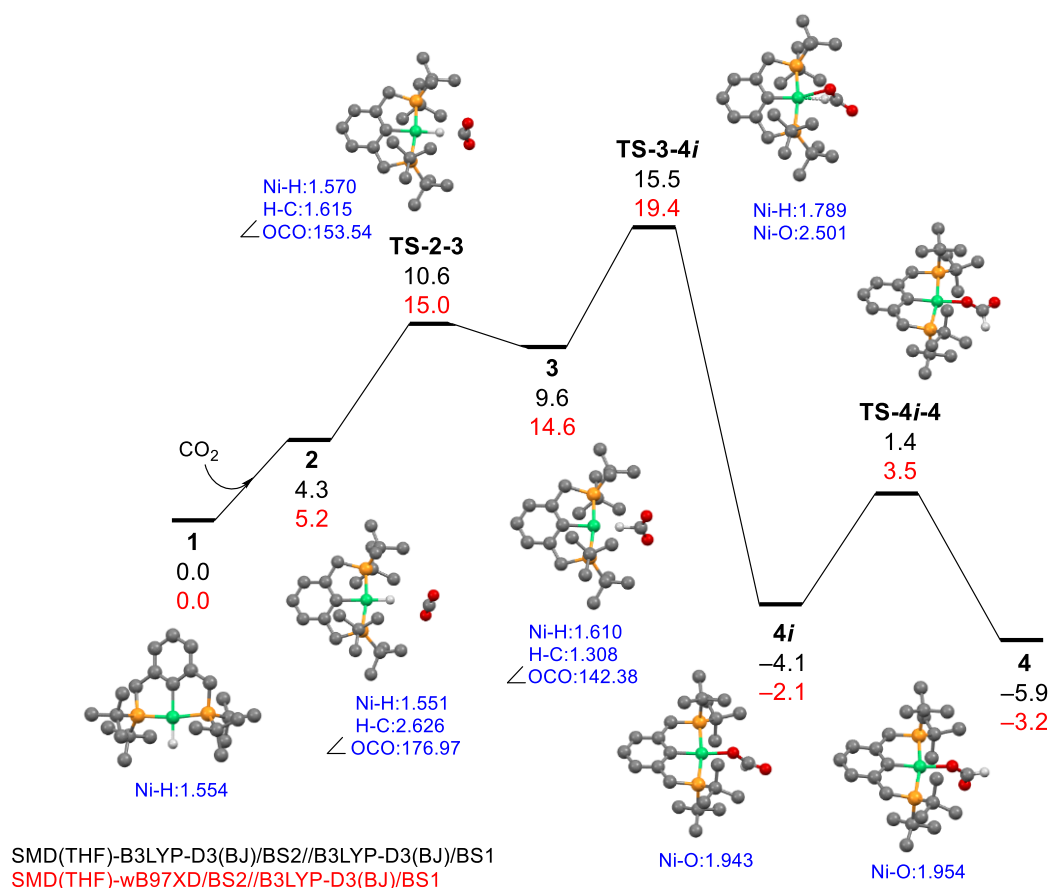

**Figure S1.** Free energy diagram for CO<sub>2</sub> insertion into **I**, <sup>t</sup>Bu<sub>2</sub>(PCP)Ni–H. Selected atom distances are given in Å, selected bond angles are given in degrees, and  $\Delta G^\circ/\Delta G^{\ddagger}$  are in kcal mol<sup>-1</sup>. Hydrogen atoms except the hydride are omitted for clarity. Color code: green, Ni; yellow, P; gray, C; red, O; white, H. The red values are from SMD(THF)-wB97XD/BS2//B3LYP-D3(BJ)/BS1 computations, and the black values are from SMD(THF)-B3LYP-D3(BJ)/BS2//B3LYP-D3(BJ)/BS1 computations.

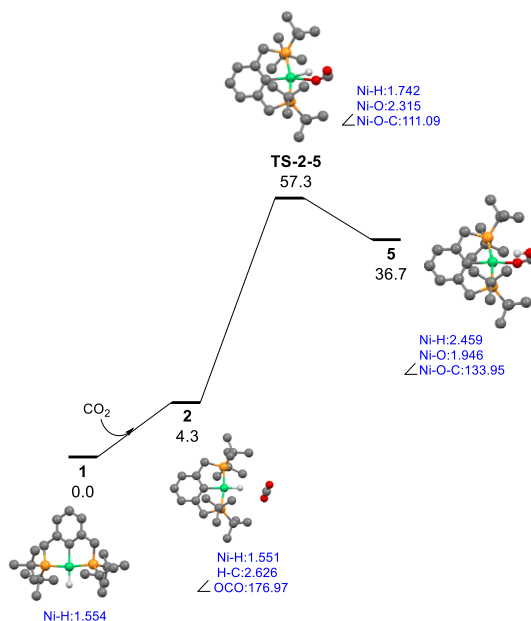

**Figure S2.** Free energy diagram for proton transfer from the Ni–H to the CO<sub>2</sub>.

Selected atom distances are given in Å, selected bond angles are given in degrees, and  $\Delta G^\circ/\Delta G^\ddagger$  are in kcal mol<sup>-1</sup>. Hydrogen atoms except the hydride are omitted for clarity. Color code: green, Ni; yellow, P; gray, C; red, O; white, H.

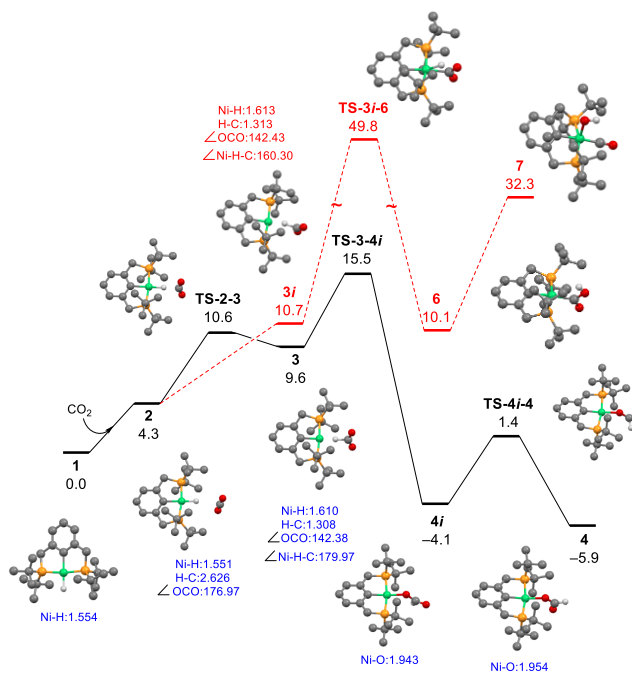

**Figure S3.** Free energy diagram for formate pathway and CO pathway with **I**, <sup>t</sup>Bu<sub>2</sub>(PCP)Ni–H.

Selected atom distances are given in Å, selected bond angles are given in degrees, and  $\Delta G^\circ/\Delta G^\ddagger$  are in kcal mol<sup>-1</sup>. Hydrogen atoms except the hydride are omitted for clarity. Color code: green, Ni; yellow, P; gray, C; red, O; white, H. The red dashed line represents the CO pathway, and the black solid line represents the formate pathway.

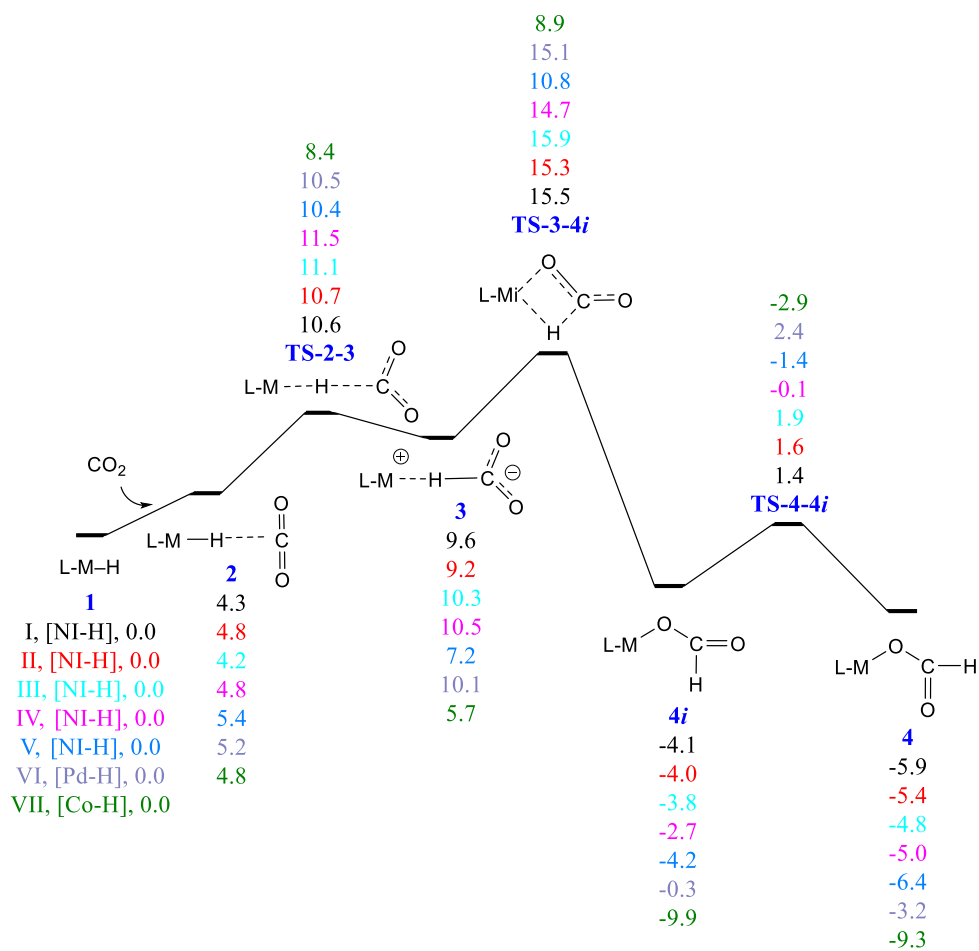

**Figure S4.** Free energy diagram for CO<sub>2</sub> insertion into TM-H.  $\Delta G^\circ/\Delta G^\ddagger$  are in kcal mol<sup>-1</sup>.

**Table S2.** The AIM (Atoms-In-Molecules) analysis of the optimized structure **3**, M-(H)-formate. The orange balls represent the BCP (bond critical point), the yellow balls represent RCP (ring critical point), the green balls represent CCP (cage critical point), and the bond paths are shown in orange. Atom color codes: C, gray; H, white; O, red; N, blue; P, orange; Ni, Ni, lime; Co, ochre; Pd, tan. The electron densities of bond critical points [ $\rho_{\text{BCP}}$ ] are given in a.u.

|                                                                                                                                                                                                                              |                                                                                                                                                                                                                           |                                                                                                                                                                                                                              |
|------------------------------------------------------------------------------------------------------------------------------------------------------------------------------------------------------------------------------|---------------------------------------------------------------------------------------------------------------------------------------------------------------------------------------------------------------------------|------------------------------------------------------------------------------------------------------------------------------------------------------------------------------------------------------------------------------|
| <p><b>I, Ni-(H)-formate</b></p> 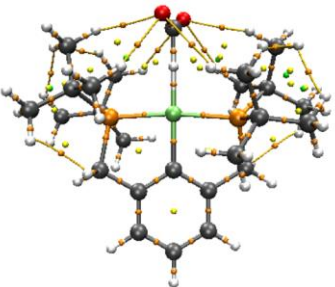 <p><math>\rho_{\text{BCP, Ni-H}} = 0.0786</math><br/> <math>\rho_{\text{BCP, C-H}} = 0.1527</math></p>     | <p><b>II, Ni-(H)-formate</b></p>  <p><math>\rho_{\text{BCP, Ni-H}} = 0.0782</math><br/> <math>\rho_{\text{BCP, C-H}} = 0.1549</math></p> | <p><b>III, Ni-(H)-formate</b></p>  <p><math>\rho_{\text{BCP, Ni-H}} = 0.0801</math><br/> <math>\rho_{\text{BCP, C-H}} = 0.1473</math></p> |
| <p><b>IV, Ni-(H)-formate</b></p>  <p><math>\rho_{\text{BCP, Ni-H}} = 0.0800</math><br/> <math>\rho_{\text{BCP, C-H}} = 0.1464</math></p>   | <p><b>V, Ni-(H)-formate</b></p>  <p><math>\rho_{\text{BCP, Ni-H}} = 0.0730</math><br/> <math>\rho_{\text{BCP, C-H}} = 0.1673</math></p> | <p><b>VI, Pd-(H)-formate</b></p>  <p><math>\rho_{\text{BCP, Pd-H}} = 0.0706</math><br/> <math>\rho_{\text{BCP, C-H}} = 0.1565</math></p> |
| <p><b>VII, Co-(H)-formate</b></p>  <p><math>\rho_{\text{BCP, Co-H}} = 0.0698</math><br/> <math>\rho_{\text{BCP, C-H}} = 0.1838</math></p> |                                                                                                                                                                                                                           |                                                                                                                                                                                                                              |

**Table S3.** The first three NAdOs (natural adaptive orbitals, isovalue = 0.05) with their eigenvalues of M-H-C interaction in structure **3**, **TM-(H)-formate**.

| Structure | Orbital 1                                                                                                                                                                                               | Orbital 2                                                                                         | Orbital 3                                                                                          |
|-----------|---------------------------------------------------------------------------------------------------------------------------------------------------------------------------------------------------------|---------------------------------------------------------------------------------------------------|----------------------------------------------------------------------------------------------------|
| I         | <p>0.381</p> 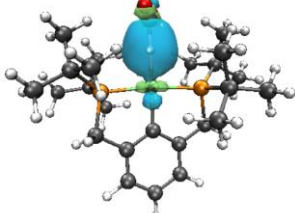 <p>55.4%(H, 1s) + 10.2% (C, 2p)<br/>+3.6%(C, 2s) + 18.2% (Ni, 3d)+<br/>4.1% (Ni, 3p)+ 5.8% (Ni, 3s)</p>  | <p>0.012</p>    | <p>0.012</p>    |
| II        | <p>0.373</p>  <p>55.3%(H, 1s) + 10.3% (C, 2p)<br/>+3.6%(C, 2s) + 18.2% (Ni, 3d)+<br/>4.1% (Ni, 3p)+ 5.8% (Ni, 3s)</p>  | <p>0.012</p>    | <p>0.012</p>    |
| III       | <p>0.392</p>  <p>55.5%(H, 1s) + 9.7% (C, 2p)<br/>+3.5%(C, 2s) + 18.5% (Ni, 3d)+<br/>4.2% (Ni, 3p)+ 5.8% (Ni, 3s)</p> | <p>0.012</p>  | <p>0.012</p>  |
| IV        | <p>0.392</p>  <p>57.6%(H, 1s) + 9.7% (C, 2p)<br/>+3.7%(C, 2s) + 18.3% (Ni, 3d)+<br/>2.7% (Ni, 3p)+ 5.4% (Ni, 3s)</p> | <p>0.12</p>   | <p>0.12</p>   |



|     |                                                                                                                                                                                                              |                                                                                                   |                                                                                                    |
|-----|--------------------------------------------------------------------------------------------------------------------------------------------------------------------------------------------------------------|---------------------------------------------------------------------------------------------------|----------------------------------------------------------------------------------------------------|
| V   | <p>0.351</p> 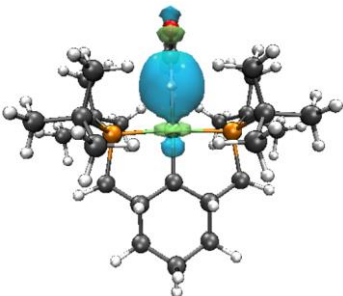 <p>53.6%(H, 1s) + 11.4% (C, 2p)<br/>+4.1%(C, 2s) + 17.2% (Ni, 3d)+<br/>6.0% (Ni, 3p)+ 5.2% (Ni, 3s)</p>       | <p>0.012</p>    | <p>0.011</p>    |
| VI  | <p>0.374</p>  <p>49.0%(H, 1s) + 9.8% (C, 2p)<br/>+4.6%(C, 2s) + 20.1% (Pd, 4d)+<br/>6.2% (Pd, 4p)+ 6.3% (Pd, 4s)</p>        | <p>0.013</p>    | <p>0.012</p>    |
| VII | <p>0.326</p>  <p>52.1%(H, 1s) + 13.5% (C, 2p)<br/>+6.1%(C, 2s) + 15.9% (Co,<br/>3d)+ 4.2% (Co, 3p)+ 4.3% (Co,<br/>3s)</p> | <p>0.012</p>  | <p>0.012</p>  |



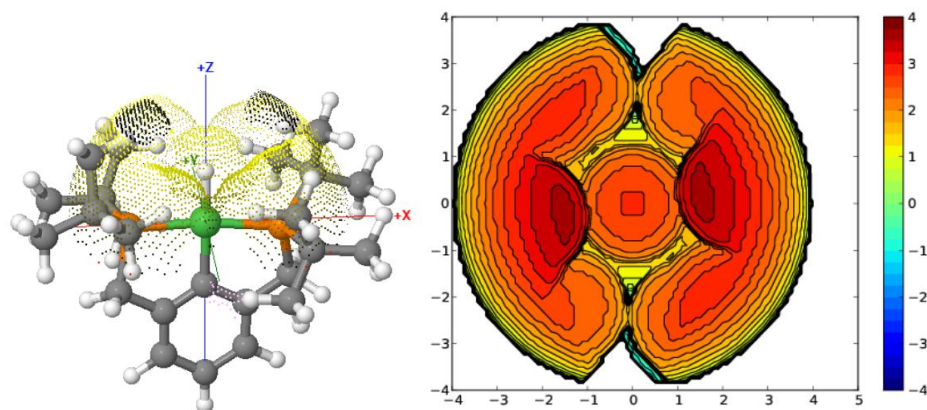

**Figure S5.** The representations of 3D and 2D steric maps of **TM-H**.

Details on the calculation of percentage buried volume (%  $V_{\text{Bur}}$ ) and the generation of steric map via SambVca (version 2.1): (1) Ni atom was coordinated to the center of the sphere, (2)  $\text{C}_{\text{tBu}}/\text{C}_{\text{tBu}}/\text{C}_{\text{tBu}}/\text{C}_{\text{tBu}}$  atoms were defined as the positive z axis, (3)  $\text{C}_{\text{Me}}/\text{C}_{\text{Me}}/\text{C}_{\text{Me}}/\text{C}_{\text{Me}}/\text{C}_{\text{Me}}/\text{C}_{\text{Me}}$  atoms of the coordinated pyridyl unit were defined as xz-plane, (4) Atomic Bondi radii were scaled by 1.17, (5) Sphere radius was set to 4.0 Å, (6) Mesh spacing for numerical integration was set to 0.10, (7) H atoms were included in the calculations.

**Table S4.** The steric map of optimized **TM-H** and **[TM]<sup>+</sup>**.

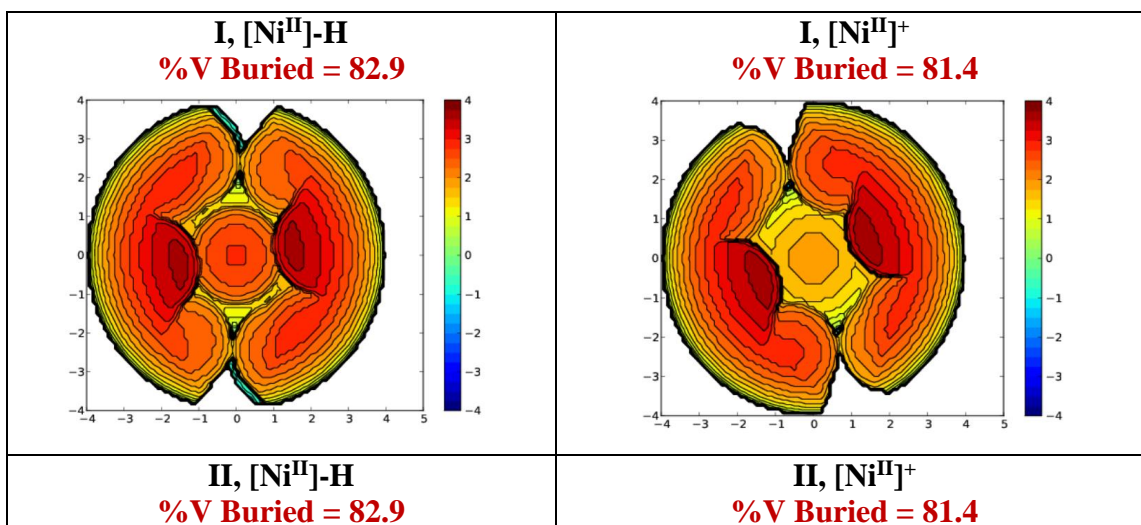

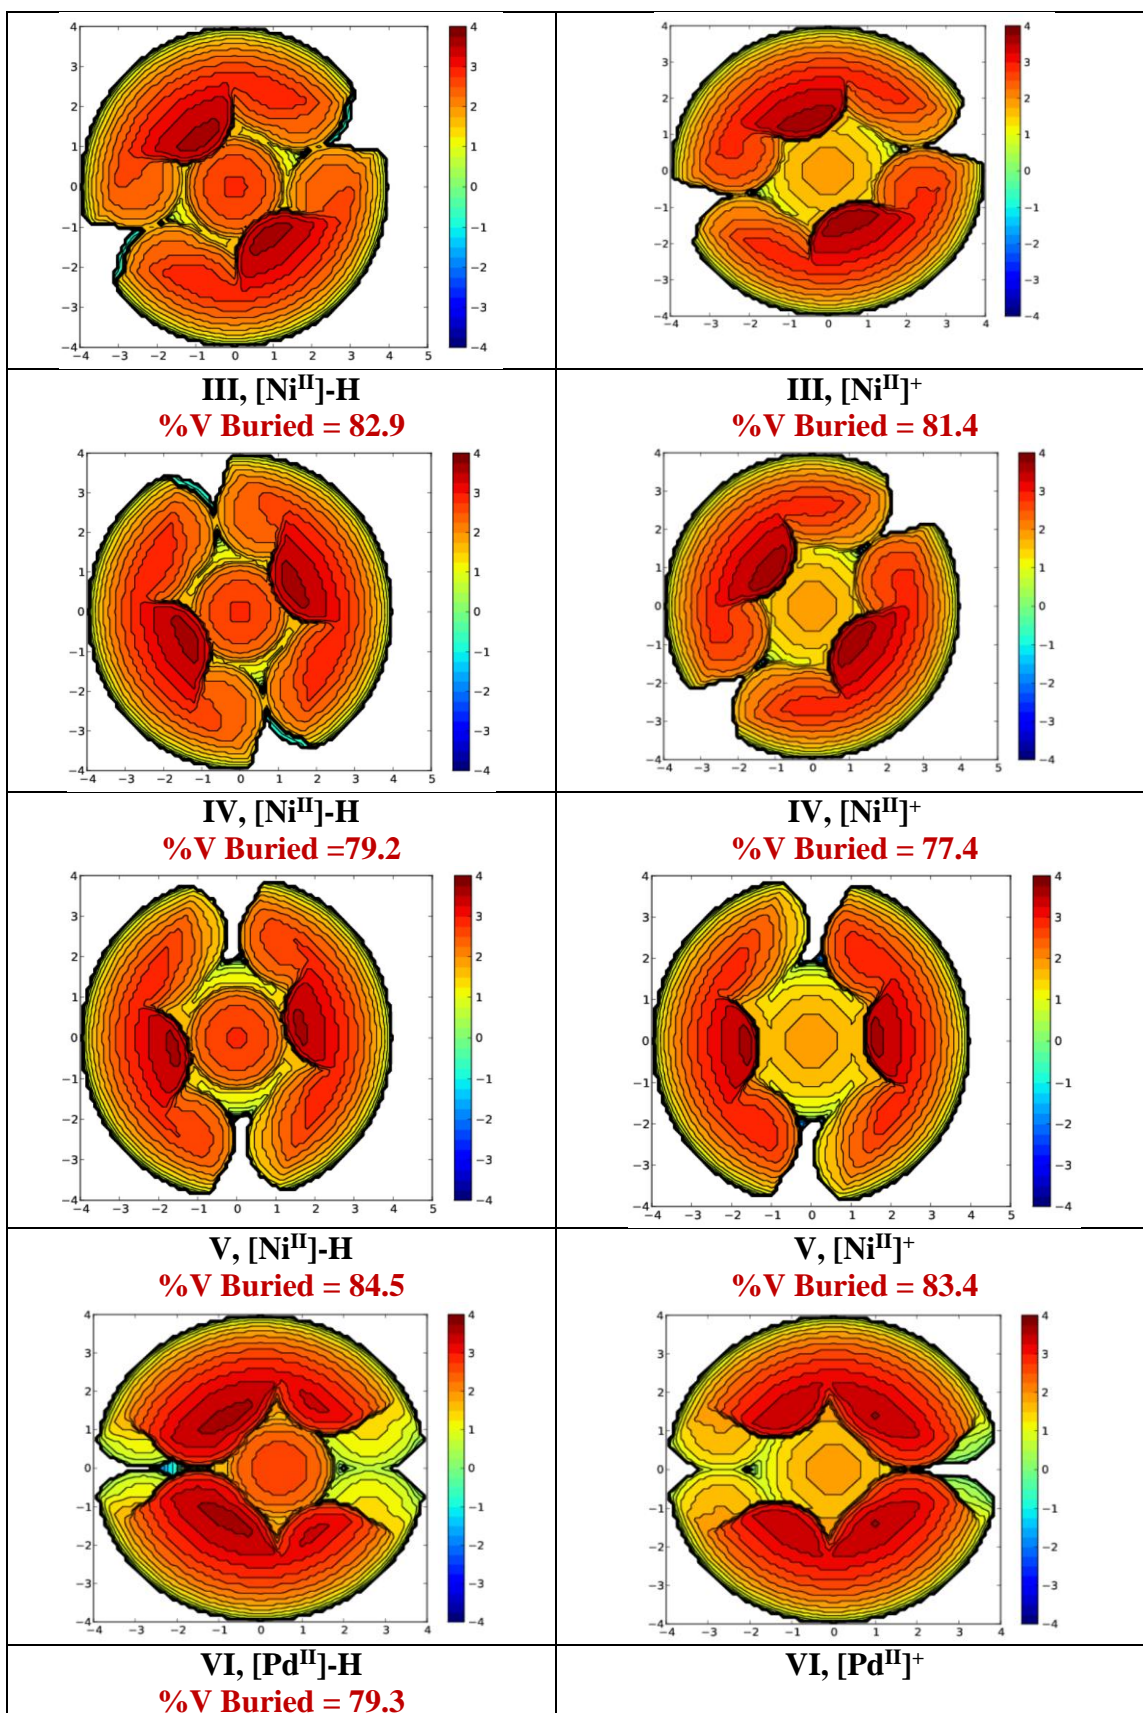

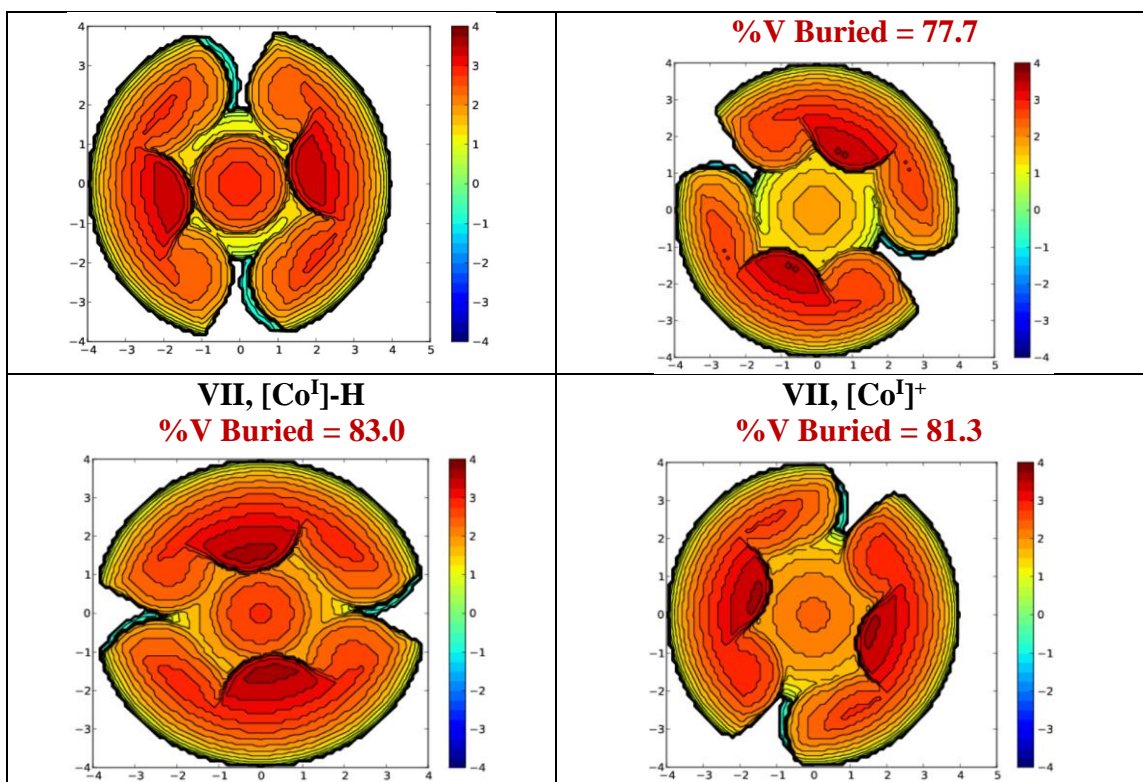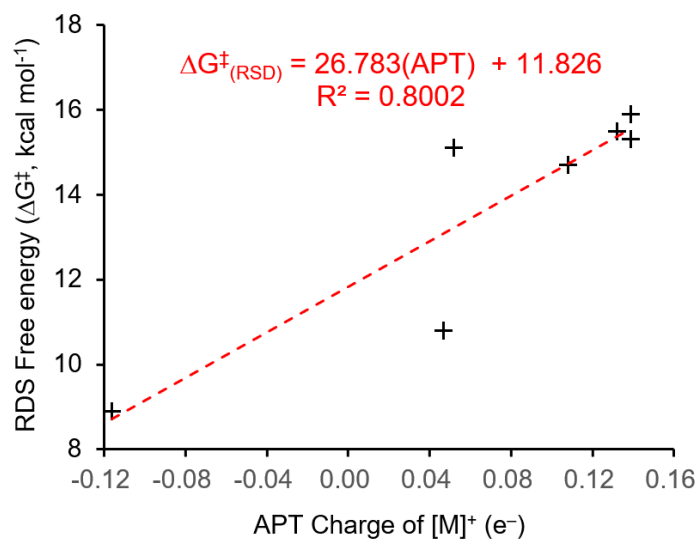

**Figure S6.** The linear fitting between the  $\Delta G^{\ddagger}$  of RDS for TM-H complexes **I** to **VII** and the APT charges of TM atoms in the related  $[\text{TM}]^+$ .

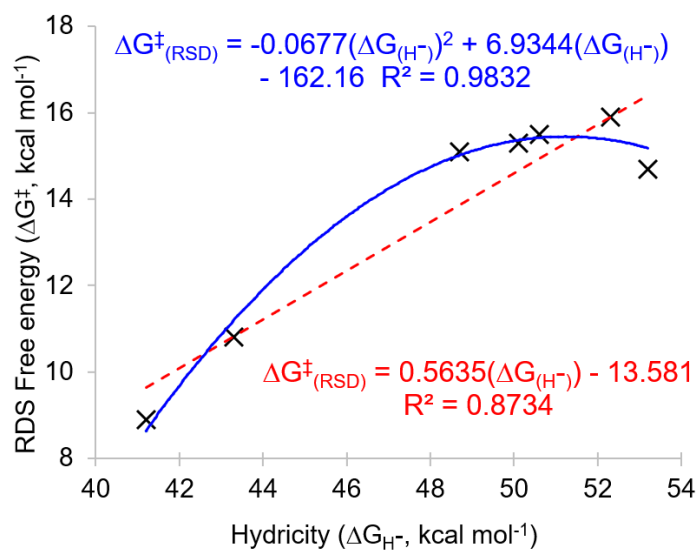

**Figure S7.** The fitting between the  $\Delta G^{\ddagger}$  of RDS for **TM–H** complexes **I** to **VII** and the computed hydricities. The blue line represents the second-order polynomial fitting, and the red line represents the linear fitting.

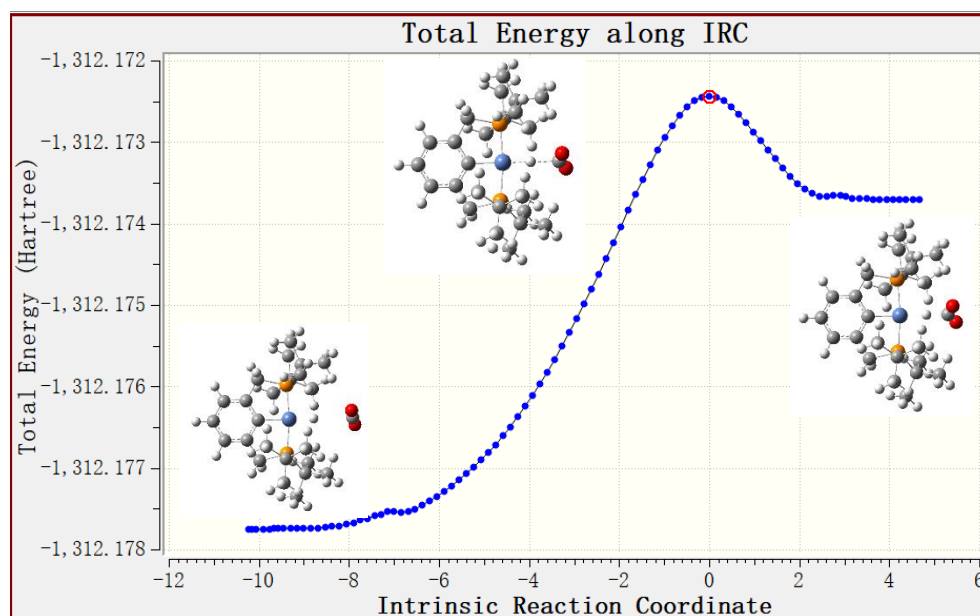

**Figure S8.** IRC plots for **TS-2-3**.



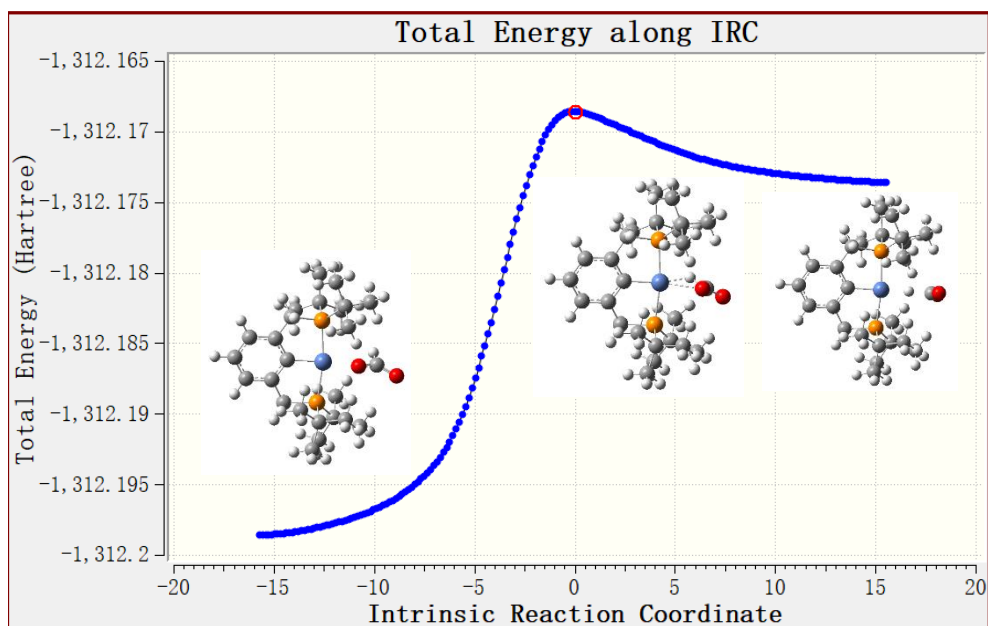

**Figure S9.** IRC plots for **TS-3-4i**.

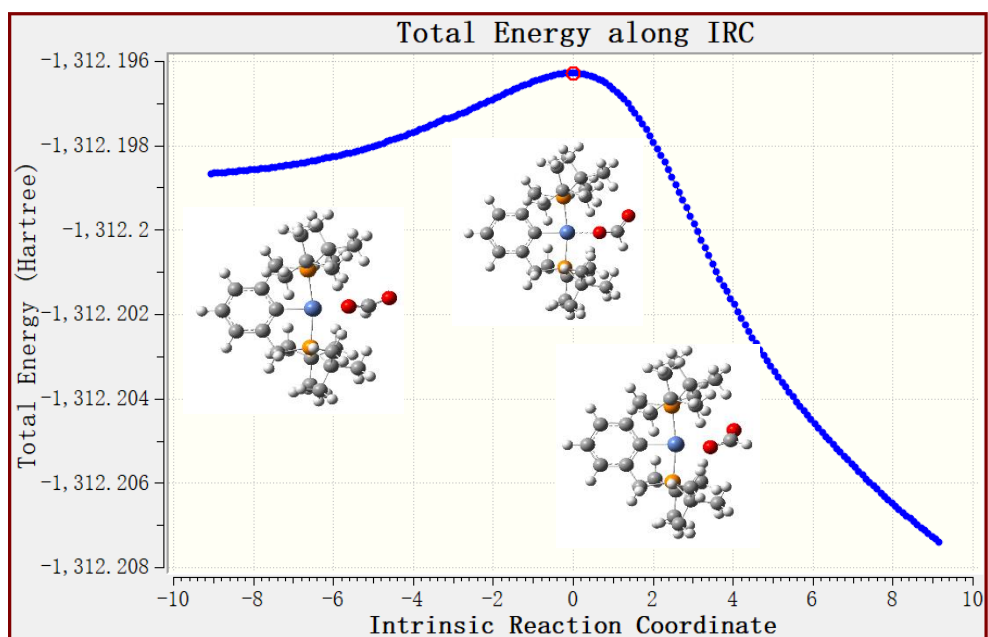

**Figure S10.** IRC plots for **TS-4i-4**.

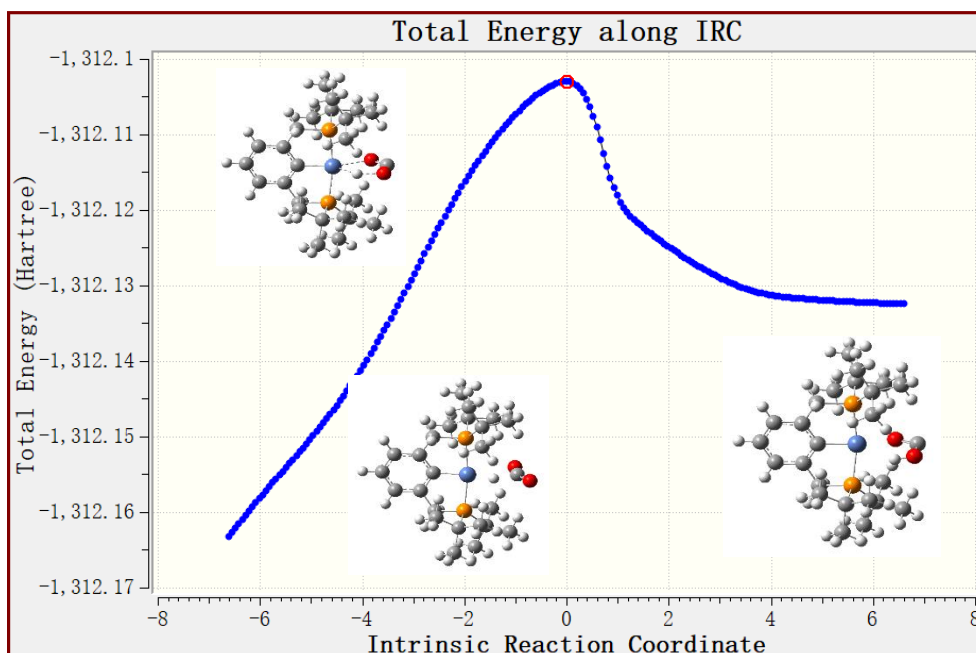

**Figure S11.** IRC plots for **TS-2-5**.

**Table S5.** DFT computed energies for species in **Chart 2** at 1 atm and 298.15 K. Energies are given in Hartrees.

| Species                                                     | $E_{\text{(gas, B3LYP-D3(BJ)/BS1)}}$ | $G_{\text{(gas, B3LYP-D3(BJ)/BS1)}}$ | $E_{\text{(soln, SMD-B3LYP-D3(BJ)/BS2//B3LYP-D3(BJ)/BS1)}}$ |
|-------------------------------------------------------------|--------------------------------------|--------------------------------------|-------------------------------------------------------------|
| <b>CO<sub>2</sub></b>                                       | -188.580762                          | -188.589853                          | -188.6727491                                                |
| <b>H<sup>-</sup></b>                                        | -0.461817                            | -0.471816                            | -0.640209                                                   |
| <b>I, <sup>t</sup>Bu<sup>2</sup>(PCP)Ni-H</b>               |                                      |                                      |                                                             |
| Ni-H, 1                                                     | -1123.586868                         | -1123.016969                         | -3132.804606                                                |
| Ni <sup>+</sup>                                             | -1122.803073                         | -1122.241500                         | -3132.065402                                                |
| Ni-H + CO <sub>2</sub> , 2                                  | -1312.178776                         | -1311.604758                         | -3321.483774                                                |
| Ni-(H)-formate, 3                                           | -1312.173709                         | -1311.594479                         | -3321.480418                                                |
| Ni-(O)-formate-isomer, 4i                                   | -1312.199612                         | -1311.617444                         | -3321.505249                                                |
| Ni-(O)-formate, 4                                           | -1312.209734                         | -1311.627061                         | -3321.508558                                                |
| Ni-(O)-hydroxyl, 5                                          | -1312.133166                         | -1311.550291                         | -3321.440964                                                |
| TS-2-3                                                      | -1312.172436                         | -1311.595445                         | -3321.476692                                                |
| TS-3-4                                                      | -1312.168592                         | -1311.586299                         | -3321.474447                                                |
| TS-4i-4                                                     | -1312.196289                         | -1311.613462                         | -3321.497111                                                |
| TS-2-5                                                      | -1312.102943                         | -1311.527472                         | -3321.400638                                                |
| Ni-(H)-formate-isomer, 3i                                   | -1312.171706                         | -1311.592604                         | -3321.478616                                                |
| TS-3i-6                                                     | -1312.104423                         | -1311.527661                         | -3321.413899                                                |
| Ni-carboxylic acid, 6                                       | -1312.176186                         | -1311.592516                         | -3321.484143                                                |
| Ni-carbonyl, 7                                              | -1312.135290                         | -1311.553514                         | -3321.446832                                                |
| <b>II, <sup>t</sup>Bu<sup>2</sup>(<i>p</i>-MeO-PCP)Ni-H</b> |                                      |                                      |                                                             |

|                                                            |              |              |              |
|------------------------------------------------------------|--------------|--------------|--------------|
| Ni-H                                                       | -1238.113514 | -1237.514733 | -3247.381892 |
| Ni <sup>+</sup>                                            | -1237.331990 | -1236.741655 | -3246.643402 |
| Ni-H + CO <sub>2</sub>                                     | -1426.705498 | -1426.101645 | -3436.061119 |
| Ni-(H)-formate                                             | -1426.700760 | -1426.092707 | -3436.058276 |
| Ni-(O)-formate-isomer                                      | -1426.726728 | -1426.115124 | -3436.082998 |
| Ni-(O)-formate                                             | -1426.736760 | -1426.124144 | -3436.086171 |
| TS-2-3                                                     | -1426.699337 | -1426.093004 | -3436.054244 |
| TS-3-4                                                     | -1426.695673 | -1426.083743 | -3436.052254 |
| TS-4i-4                                                    | -1426.723374 | -1426.110958 | -3436.074789 |
| <b>III, <sup>t</sup>Bu<sub>2</sub>(<i>p</i>-I-PCP)Ni-H</b> |              |              |              |
| Ni-H                                                       | -1134.380989 | -1133.825648 | -3430.009043 |
| Ni <sup>+</sup>                                            | -1133.590997 | -1133.043491 | -3429.267600 |
| Ni-H + CO <sub>2</sub>                                     | -1322.972813 | -1322.413425 | -3618.688213 |
| Ni-(H)-formate                                             | -1322.966368 | -1322.401863 | -3618.683688 |
| Ni-(O)-formate-isomer                                      | -1322.992463 | -1322.425046 | -3618.709042 |
| Ni-(O)-formate                                             | -1323.002723 | -1322.434086 | -3618.711789 |
| TS-2-3                                                     | -1322.965691 | -1322.402848 | -3618.680708 |
| TS-3-4                                                     | -1322.960981 | -1322.393385 | -3618.677800 |
| TS-4i-4                                                    | -1322.990236 | -1322.421622 | -3618.701129 |
| <b>IV, <sup>i</sup>Pr<sub>2</sub>(PCP)Ni-H</b>             |              |              |              |
| Ni-H                                                       | -966.312419  | -965.853026  | -2975.473016 |
| Ni <sup>+</sup>                                            | -965.525459  | -965.073856  | -2974.730284 |
| Ni-H + CO <sub>2</sub>                                     | -1154.904581 | -1154.441660 | -3164.150734 |
| Ni-(H)-formate                                             | -1154.899530 | -1154.430698 | -3164.147560 |
| Ni-(O)-formate-isomer                                      | -1154.926243 | -1154.463383 | -3164.172687 |
| Ni-(O)-formate                                             | -1154.935887 | -1154.453301 | -3164.175886 |
| TS-2-3                                                     | -1154.898904 | -1154.431500 | -3164.144532 |
| TS-3-4                                                     | -1154.896520 | -1154.423700 | -3164.144851 |
| TS-4i-4                                                    | -1154.925120 | -1154.453157 | -3164.167562 |
| <b>V, <sup>t</sup>Bu<sub>2</sub>(PCyP)Ni-H</b>             |              |              |              |
| Ni-H                                                       | -1127.209894 | -1126.570965 | -3136.423356 |
| Ni <sup>+</sup>                                            | -1126.439528 | -1125.808043 | -3135.696733 |
| Ni-H + CO <sub>2</sub>                                     | -1315.801791 | -1315.157312 | -3325.102211 |
| Ni-(H)-formate                                             | -1315.800916 | -1315.150876 | -3325.104876 |
| Ni-(O)-formate-isomer                                      | -1315.825145 | -1315.172046 | -3325.126089 |
| Ni-(O)-formate                                             | -1315.837804 | -1315.183979 | -3325.130271 |
| TS-2-3                                                     | -1315.797641 | -1315.150422 | -3325.096915 |
| TS-3-4                                                     | -1315.797942 | -1315.145909 | -3325.101131 |
| TS-4i-4                                                    | -1315.823756 | -1315.171094 | -3325.121183 |
| <b>VI, <sup>t</sup>Bu<sub>2</sub>(PCP)Pd-H</b>             |              |              |              |
| Pd-H                                                       | -1081.042887 | -1080.475067 | -1752.397053 |
| Pd <sup>+</sup>                                            | -1080.265952 | -1079.704116 | -1751.663330 |
| Pd-H + CO <sub>2</sub>                                     | -1269.635512 | -1269.062382 | -1941.075876 |
| Pd-(H)-formate                                             | -1269.628678 | -1269.049801 | -1941.073837 |
| Pd-(O)-formate-isomer                                      | -1269.646459 | -1269.067870 | -1941.090198 |



|                                                 |              |              |              |
|-------------------------------------------------|--------------|--------------|--------------|
| Pd-(O)-formate                                  | -1269.659888 | -1269.079002 | -1941.096981 |
| TS-2-3                                          | -1269.628128 | -1269.053249 | -1941.069278 |
| TS-3-4                                          | -1269.624038 | -1269.042718 | -1941.068291 |
| TS-4i-4                                         | -1269.646369 | -1269.065735 | -1941.087887 |
| <b>VII, <sup>t</sup>Bu<sup>2</sup>(PNP)Co-H</b> |              |              |              |
| Co-H                                            | -1115.976217 | -1115.408356 | -3023.874194 |
| Co <sup>+</sup>                                 | -1115.213024 | -1114.650186 | -3023.153317 |
| Co-H + CO <sub>2</sub>                          | -1304.568979 | -1303.996349 | -3212.553180 |
| Co-(H)-formate                                  | -1304.571538 | -1303.991872 | -3212.558812 |
| Co-(O)-formate-isomer                           | -1304.598259 | -1304.017690 | -3212.584472 |
| Co-(O)-formate                                  | -1304.608801 | -1304.025703 | -3212.586129 |
| TS-2-3                                          | -1304.565959 | -1303.991926 | -3212.548758 |
| TS-3-4                                          | -1304.570286 | -1303.988559 | -3212.555760 |
| TS-4i-4                                         | -1304.595249 | -1304.013451 | -3212.574651 |

**Table S6.** Cartesian coordinates of optimized species.

3  
CO<sub>2</sub>            el energy= -188.580762132  
C                0.169569            0.067934            -0.021409  
O                0.169407            0.208296            -1.179089  
O                0.169732            -0.072427            1.136272

71  
1, Ni-H        el energy= -1123.58686785  
Ni              0.000000            0.000000            0.219178  
H              0.000000            0.000000            1.773663  
C              0.000000            0.000000            -1.739477  
C              1.198136            0.171310            -2.475506  
C              2.487752            0.386304            -1.703269  
C              1.197445            0.165666            -3.875765  
H              2.129514            0.298793            -4.425261  
C              0.000000            0.000000            -4.575765  
H              0.000000            0.000000            -5.664208  
C              -1.197445            -0.165666            -3.875765  
H              -2.129514            -0.298793            -4.425261  
C              -1.198136            -0.171310            -2.475506  
C              -2.487752            -0.386304            -1.703269  
P              2.160095            -0.143588            0.066085  
P              -2.160095            0.143588            0.066085  
C              3.185200            1.051275            1.124609  
C              2.379082            2.367971            1.103681

|   |           |           |           |
|---|-----------|-----------|-----------|
| C | 4.601102  | 1.311952  | 0.583181  |
| C | 3.253657  | 0.547924  | 2.575169  |
| C | 2.773920  | -1.939057 | 0.166026  |
| C | 4.300359  | -2.082248 | 0.078327  |
| C | 2.251384  | -2.566923 | 1.471987  |
| C | 2.121253  | -2.686942 | -1.015603 |
| C | -2.773920 | 1.939057  | 0.166026  |
| C | -2.121253 | 2.686942  | -1.015603 |
| C | -2.251384 | 2.566923  | 1.471987  |
| C | -4.300359 | 2.082248  | 0.078327  |
| C | -3.185200 | -1.051275 | 1.124609  |
| C | -4.601102 | -1.311952 | 0.583181  |
| C | -2.379082 | -2.367971 | 1.103681  |
| C | -3.253657 | -0.547924 | 2.575169  |
| H | 3.348042  | -0.130005 | -2.150129 |
| H | 2.746275  | 1.453478  | -1.680541 |
| H | -2.746275 | -1.453478 | -1.680541 |
| H | -3.348042 | 0.130005  | -2.150129 |
| H | 2.896594  | 3.124477  | 1.710545  |
| H | 2.271789  | 2.772083  | 0.089220  |
| H | 1.375691  | 2.212570  | 1.515177  |
| H | 5.225603  | 0.414253  | 0.596850  |
| H | 4.584466  | 1.698071  | -0.442457 |
| H | 5.095245  | 2.068398  | 1.209600  |
| H | 3.909327  | -0.324290 | 2.675571  |
| H | 3.660841  | 1.340884  | 3.218354  |
| H | 2.257019  | 0.283376  | 2.946861  |
| H | 4.565233  | -3.147573 | 0.017317  |
| H | 4.710472  | -1.589718 | -0.812092 |
| H | 4.802282  | -1.671374 | 0.960801  |
| H | 2.702939  | -2.118983 | 2.361987  |
| H | 1.166038  | -2.445286 | 1.552526  |
| H | 2.487245  | -3.640652 | 1.479604  |
| H | 2.468957  | -2.321409 | -1.987592 |
| H | 1.031013  | -2.588120 | -0.997535 |
| H | 2.377081  | -3.753480 | -0.944420 |
| H | -2.377081 | 3.753480  | -0.944420 |
| H | -1.031013 | 2.588120  | -0.997535 |
| H | -2.468957 | 2.321409  | -1.987592 |
| H | -2.702939 | 2.118983  | 2.361987  |
| H | -2.487245 | 3.640652  | 1.479604  |
| H | -1.166038 | 2.445286  | 1.552526  |
| H | -4.565233 | 3.147573  | 0.017317  |
| H | -4.710472 | 1.589718  | -0.812092 |
| H | -4.802282 | 1.671374  | 0.960801  |

|   |           |           |           |
|---|-----------|-----------|-----------|
| H | -5.095245 | -2.068398 | 1.209600  |
| H | -5.225603 | -0.414253 | 0.596850  |
| H | -4.584466 | -1.698071 | -0.442457 |
| H | -1.375691 | -2.212570 | 1.515177  |
| H | -2.896594 | -3.124477 | 1.710545  |
| H | -2.271789 | -2.772083 | 0.089220  |
| H | -3.660841 | -1.340884 | 3.218354  |
| H | -2.257019 | -0.283376 | 2.946861  |
| H | -3.909327 | 0.324290  | 2.675571  |

70

1, Ni+      el energy= -1122.80307291

|    |           |           |           |
|----|-----------|-----------|-----------|
| Ni | 0.000000  | 0.000000  | -0.041785 |
| C  | 0.000000  | 0.000000  | -1.925698 |
| C  | 0.680328  | 1.016179  | -2.627781 |
| C  | 1.402937  | 2.104166  | -1.863765 |
| C  | 0.676229  | 1.001967  | -4.027906 |
| H  | 1.206827  | 1.780732  | -4.572639 |
| C  | 0.000000  | 0.000000  | -4.724566 |
| H  | 0.000000  | 0.000000  | -5.811543 |
| C  | -0.676229 | -1.001967 | -4.027906 |
| H  | -1.206827 | -1.780732 | -4.572639 |
| C  | -0.680328 | -1.016179 | -2.627781 |
| C  | -1.402937 | -2.104166 | -1.863765 |
| P  | 1.698066  | 1.456173  | -0.145906 |
| P  | -1.698066 | -1.456173 | -0.145906 |
| C  | 1.542994  | 2.940263  | 1.019691  |
| C  | 0.030204  | 3.245450  | 1.082342  |
| C  | 2.295341  | 4.179070  | 0.502762  |
| C  | 2.030749  | 2.566822  | 2.429749  |
| C  | 3.398016  | 0.623386  | -0.145379 |
| C  | 4.557321  | 1.631498  | -0.173951 |
| C  | 3.492485  | -0.279825 | 1.100100  |
| C  | 3.461486  | -0.273397 | -1.398915 |
| C  | -3.398016 | -0.623386 | -0.145379 |
| C  | -3.461486 | 0.273397  | -1.398915 |
| C  | -3.492485 | 0.279825  | 1.100100  |
| C  | -4.557321 | -1.631498 | -0.173951 |
| C  | -1.542994 | -2.940263 | 1.019691  |
| C  | -2.295341 | -4.179070 | 0.502762  |
| C  | -0.030204 | -3.245450 | 1.082342  |
| C  | -2.030749 | -2.566822 | 2.429749  |
| H  | 2.329547  | 2.420256  | -2.356934 |
| H  | 0.771507  | 2.996855  | -1.773662 |
| H  | -0.771507 | -2.996855 | -1.773662 |

|   |           |           |           |
|---|-----------|-----------|-----------|
| H | -2.329547 | -2.420256 | -2.356934 |
| H | -0.136527 | 4.129492  | 1.711310  |
| H | -0.399415 | 3.457455  | 0.095937  |
| H | -0.532178 | 2.412102  | 1.523852  |
| H | 3.375266  | 4.018933  | 0.447026  |
| H | 1.943814  | 4.492182  | -0.486780 |
| H | 2.120011  | 5.016863  | 1.190725  |
| H | 3.115627  | 2.428586  | 2.469955  |
| H | 1.777224  | 3.376910  | 3.125653  |
| H | 1.551948  | 1.651581  | 2.802132  |
| H | 5.504828  | 1.087039  | -0.280000 |
| H | 4.481361  | 2.324112  | -1.020826 |
| H | 4.619724  | 2.217770  | 0.748266  |
| H | 3.462607  | 0.283320  | 2.037176  |
| H | 2.681082  | -1.019083 | 1.114645  |
| H | 4.441443  | -0.830933 | 1.075687  |
| H | 3.440801  | 0.302392  | -2.329954 |
| H | 2.636554  | -0.993220 | -1.429680 |
| H | 4.403876  | -0.835689 | -1.377109 |
| H | -4.403876 | 0.835689  | -1.377109 |
| H | -2.636554 | 0.993220  | -1.429680 |
| H | -3.440801 | -0.302392 | -2.329954 |
| H | -3.462607 | -0.283320 | 2.037176  |
| H | -4.441443 | 0.830933  | 1.075687  |
| H | -2.681082 | 1.019083  | 1.114645  |
| H | -5.504828 | -1.087039 | -0.280000 |
| H | -4.481361 | -2.324112 | -1.020826 |
| H | -4.619724 | -2.217770 | 0.748266  |
| H | -2.120011 | -5.016863 | 1.190725  |
| H | -3.375266 | -4.018933 | 0.447026  |
| H | -1.943814 | -4.492182 | -0.486780 |
| H | 0.532178  | -2.412102 | 1.523852  |
| H | 0.136527  | -4.129492 | 1.711310  |
| H | 0.399415  | -3.457455 | 0.095937  |
| H | -1.777224 | -3.376910 | 3.125653  |
| H | -1.551948 | -1.651581 | 2.802132  |
| H | -3.115627 | -2.428586 | 2.469955  |

74

1,Ni-H+CO2 el energy= -1312.17877646

|    |           |           |           |
|----|-----------|-----------|-----------|
| Ni | 0.009243  | 0.061799  | -0.001883 |
| H  | 0.014529  | 1.612022  | 0.033646  |
| C  | 0.010475  | -1.899907 | -0.033710 |
| C  | -1.165426 | -2.641583 | 0.236586  |
| C  | -2.423945 | -1.878996 | 0.605029  |

|   |           |           |           |
|---|-----------|-----------|-----------|
| C | -1.167520 | -4.041394 | 0.200198  |
| H | -2.083868 | -4.593378 | 0.409906  |
| C | 0.007456  | -4.737392 | -0.092283 |
| H | 0.005810  | -5.825524 | -0.116671 |
| C | 1.185459  | -4.032650 | -0.349613 |
| H | 2.101900  | -4.577626 | -0.576517 |
| C | 1.187278  | -2.632612 | -0.325135 |
| C | 2.457094  | -1.858542 | -0.626719 |
| P | -2.159961 | -0.094858 | 0.092711  |
| P | 2.177847  | -0.101042 | -0.038665 |
| C | -3.049958 | 0.914668  | 1.432341  |
| C | -2.089807 | 0.876286  | 2.640717  |
| C | -4.414425 | 0.335410  | 1.845048  |
| C | -3.213060 | 2.377191  | 0.990885  |
| C | -2.981219 | 0.049418  | -1.614253 |
| C | -4.512423 | -0.060486 | -1.580049 |
| C | -2.554732 | 1.381197  | -2.258026 |
| C | -2.403325 | -1.098036 | -2.469339 |
| C | 2.916185  | -0.038618 | 1.712129  |
| C | 2.298810  | -1.221716 | 2.487125  |
| C | 2.462580  | 1.265864  | 2.394733  |
| C | 4.447289  | -0.151660 | 1.746204  |
| C | 3.130041  | 0.971906  | -1.279920 |
| C | 4.519283  | 0.422816  | -1.647398 |
| C | 2.238417  | 0.981854  | -2.540102 |
| C | 3.253957  | 2.409214  | -0.749064 |
| H | -3.334636 | -2.313992 | 0.172041  |
| H | -2.566371 | -1.887167 | 1.693806  |
| H | 2.632908  | -1.815647 | -1.709825 |
| H | 3.353116  | -2.316235 | -0.186383 |
| H | -2.527453 | 1.442164  | 3.475278  |
| H | -1.906087 | -0.146810 | 2.992326  |
| H | -1.124663 | 1.324491  | 2.380746  |
| H | -5.141188 | 0.355793  | 1.027940  |
| H | -4.334412 | -0.697405 | 2.202189  |
| H | -4.826442 | 0.935161  | 2.669155  |
| H | -3.953906 | 2.484808  | 0.190699  |
| H | -3.562314 | 2.976856  | 1.843332  |
| H | -2.261626 | 2.799588  | 0.653089  |
| H | -4.899727 | -0.092013 | -2.608508 |
| H | -4.850325 | -0.972937 | -1.073423 |
| H | -4.974195 | 0.799688  | -1.083748 |
| H | -2.949525 | 2.249842  | -1.722188 |
| H | -1.464955 | 1.470971  | -2.285449 |
| H | -2.933311 | 1.425749  | -3.289128 |

|   |           |           |           |
|---|-----------|-----------|-----------|
| H | -2.695497 | -2.086338 | -2.098795 |
| H | -1.309059 | -1.065398 | -2.494031 |
| H | -2.778734 | -0.997847 | -3.497424 |
| H | 2.637562  | -1.175706 | 3.531693  |
| H | 1.204829  | -1.180951 | 2.473346  |
| H | 2.596974  | -2.192950 | 2.078311  |
| H | 2.905950  | 2.154466  | 1.935914  |
| H | 2.765851  | 1.247949  | 3.451217  |
| H | 1.373924  | 1.372937  | 2.344929  |
| H | 4.784731  | -0.234047 | 2.789292  |
| H | 4.808266  | -1.039587 | 1.212602  |
| H | 4.932952  | 0.730195  | 1.315166  |
| H | 4.463738  | -0.591144 | -2.059512 |
| H | 4.969148  | 1.064709  | -2.418320 |
| H | 5.202522  | 0.404749  | -0.793782 |
| H | 1.254372  | 1.405418  | -2.320720 |
| H | 2.713565  | 1.594327  | -3.319343 |
| H | 2.095319  | -0.025594 | -2.950623 |
| H | 3.565066  | 3.077515  | -1.563925 |
| H | 2.297891  | 2.770153  | -0.355686 |
| H | 4.004008  | 2.486401  | 0.046132  |
| C | -0.123240 | 3.999735  | -1.051378 |
| O | -0.320965 | 4.414166  | 0.020437  |
| O | 0.072469  | 3.642907  | -2.144936 |

74

1,Ni-(H)-formate el energy= -1312.17370872

|    |           |           |           |
|----|-----------|-----------|-----------|
| Ni | 0.000047  | 0.091741  | 0.000142  |
| H  | 0.000100  | 1.701639  | -0.000024 |
| C  | 0.000117  | -1.840827 | 0.000238  |
| C  | -1.176702 | -2.572164 | 0.282219  |
| C  | -2.439169 | -1.815836 | 0.629326  |
| C  | -1.174811 | -3.972498 | 0.273385  |
| H  | -2.093211 | -4.517117 | 0.490296  |
| C  | 0.000157  | -4.673777 | 0.000313  |
| H  | 0.000172  | -5.761817 | 0.000316  |
| C  | 1.175109  | -3.972472 | -0.272756 |
| H  | 2.093527  | -4.517076 | -0.489631 |
| C  | 1.176968  | -2.572136 | -0.281641 |
| C  | 2.439461  | -1.815815 | -0.628681 |
| P  | -2.206846 | -0.044489 | 0.088013  |
| P  | 2.206964  | -0.044274 | -0.088017 |
| C  | -3.161832 | 0.965651  | 1.383987  |
| C  | -2.203424 | 1.051220  | 2.592136  |
| C  | -4.476055 | 0.280931  | 1.805105  |

|   |           |           |           |
|---|-----------|-----------|-----------|
| C | -3.470468 | 2.391097  | 0.897442  |
| C | -2.947676 | 0.074475  | -1.652512 |
| C | -4.472640 | -0.108898 | -1.680235 |
| C | -2.556871 | 1.434742  | -2.262708 |
| C | -2.282282 | -1.038928 | -2.487761 |
| C | 2.947696  | 0.075306  | 1.652567  |
| C | 2.281724  | -1.037413 | 2.488270  |
| C | 2.557467  | 1.436047  | 2.262024  |
| C | 4.472582  | -0.108716 | 1.680564  |
| C | 3.161892  | 0.965469  | -1.384320 |
| C | 4.476086  | 0.280700  | -1.805411 |
| C | 2.203341  | 1.050789  | -2.592399 |
| C | 3.470521  | 2.391054  | -0.898215 |
| H | -3.342653 | -2.270893 | 0.203501  |
| H | -2.580329 | -1.802766 | 1.717458  |
| H | 2.580944  | -1.803166 | -1.716772 |
| H | 3.342846  | -2.270671 | -0.202427 |
| H | -2.724469 | 1.528987  | 3.433703  |
| H | -1.870503 | 0.060309  | 2.928739  |
| H | -1.325274 | 1.657372  | 2.347276  |
| H | -5.172995 | 0.162601  | 0.969549  |
| H | -4.311071 | -0.704311 | 2.253858  |
| H | -4.970634 | 0.904266  | 2.562830  |
| H | -4.203653 | 2.399592  | 0.083998  |
| H | -3.901948 | 2.959040  | 1.733319  |
| H | -2.570819 | 2.923185  | 0.580593  |
| H | -4.817289 | -0.124693 | -2.723736 |
| H | -4.784188 | -1.053661 | -1.217453 |
| H | -4.995017 | 0.710467  | -1.175973 |
| H | -3.045726 | 2.274853  | -1.762200 |
| H | -1.477191 | 1.609890  | -2.214930 |
| H | -2.860833 | 1.454396  | -3.318628 |
| H | -2.520973 | -2.042507 | -2.119109 |
| H | -1.191809 | -0.938206 | -2.491671 |
| H | -2.640328 | -0.964193 | -3.523794 |
| H | 2.639707  | -0.962346 | 3.524303  |
| H | 1.191296  | -0.936198 | 2.492036  |
| H | 2.519986  | -2.041281 | 2.120126  |
| H | 3.046770  | 2.275675  | 1.761127  |
| H | 2.861371  | 1.456099  | 3.317955  |
| H | 1.477885  | 1.611724  | 2.214082  |
| H | 4.817032  | -0.124667 | 2.724129  |
| H | 4.783840  | -1.053587 | 1.217814  |
| H | 4.995389  | 0.710453  | 1.176433  |
| H | 4.311169  | -0.704779 | -2.253664 |



|   |           |          |           |
|---|-----------|----------|-----------|
| H | 4.970417  | 0.903752 | -2.563528 |
| H | 5.173225  | 0.162868 | -0.969951 |
| H | 1.325163  | 1.656916 | -2.347542 |
| H | 2.724272  | 1.528472 | -3.434079 |
| H | 1.870428  | 0.059816 | -2.928815 |
| H | 3.902221  | 2.958668 | -1.734206 |
| H | 2.570822  | 2.923272 | -0.581761 |
| H | 4.203543  | 2.399800 | -0.084638 |
| C | -0.000546 | 3.009340 | 0.000125  |
| O | -0.203362 | 3.400849 | 1.132175  |
| O | 0.201863  | 3.401255 | -1.131857 |

74

1, Ni-(O)-formate-isomer el energy= -1312.19961162

|    |           |           |           |
|----|-----------|-----------|-----------|
| Ni | 0.019566  | -0.144145 | 0.012060  |
| P  | -2.219596 | -0.068374 | 0.098512  |
| P  | 2.225581  | 0.145100  | -0.052815 |
| O  | 0.095003  | -2.048289 | 0.393277  |
| O  | -0.590468 | -4.143777 | -0.019924 |
| C  | -3.086215 | -1.056834 | 1.472325  |
| C  | -2.089538 | -1.032859 | 2.651583  |
| C  | -3.333753 | -2.521362 | 1.072739  |
| C  | -4.416967 | -0.411410 | 1.903190  |
| C  | -3.037294 | -0.277894 | -1.600424 |
| C  | -2.554861 | -1.607401 | -2.209552 |
| C  | -4.571964 | -0.234298 | -1.547149 |
| C  | -2.526807 | 0.871793  | -2.492574 |
| C  | -2.494457 | 1.713819  | 0.560070  |
| C  | -1.279182 | 2.489924  | 0.105089  |
| C  | -1.353080 | 3.881892  | -0.022883 |
| C  | -0.224208 | 4.620362  | -0.377627 |
| C  | 0.984148  | 3.960123  | -0.597443 |
| C  | 1.062733  | 2.566407  | -0.484250 |
| C  | -0.072153 | 1.789137  | -0.142634 |
| C  | 2.385532  | 1.872028  | -0.727894 |
| C  | 3.250201  | -0.923708 | -1.235765 |
| C  | 2.389635  | -1.038507 | -2.512367 |
| C  | 4.606262  | -0.295062 | -1.603351 |
| C  | 3.466806  | -2.326173 | -0.642174 |
| C  | 2.923370  | 0.194138  | 1.710912  |
| C  | 2.147587  | 1.311746  | 2.440326  |
| C  | 2.613278  | -1.144756 | 2.410912  |
| C  | 4.428607  | 0.492530  | 1.774012  |
| C  | -0.099182 | -3.079237 | -0.366073 |
| H  | -1.171910 | -1.562781 | 2.380002  |

|   |           |           |           |
|---|-----------|-----------|-----------|
| H | -2.544024 | -1.532220 | 3.518648  |
| H | -1.830760 | -0.010014 | 2.957580  |
| H | -4.059229 | -2.609620 | 0.256150  |
| H | -3.760765 | -3.047012 | 1.938881  |
| H | -2.415609 | -3.047154 | 0.794895  |
| H | -4.837797 | -0.996174 | 2.732937  |
| H | -5.158535 | -0.402661 | 1.098735  |
| H | -4.290352 | 0.615915  | 2.262106  |
| H | -1.469442 | -1.593153 | -2.355576 |
| H | -3.025469 | -1.749611 | -3.192489 |
| H | -2.795113 | -2.476574 | -1.591159 |
| H | -4.941027 | 0.681452  | -1.068973 |
| H | -4.990443 | -1.093872 | -1.014783 |
| H | -4.970811 | -0.254766 | -2.571243 |
| H | -2.894288 | 0.714127  | -3.516155 |
| H | -1.432486 | 0.905012  | -2.520410 |
| H | -2.880016 | 1.852596  | -2.156397 |
| H | -3.435630 | 2.118015  | 0.166181  |
| H | -2.571512 | 1.752206  | 1.654327  |
| H | -2.297130 | 4.391556  | 0.167349  |
| H | -0.283896 | 5.702493  | -0.473449 |
| H | 1.873944  | 4.530817  | -0.861799 |
| H | 3.233666  | 2.417537  | -0.294290 |
| H | 2.587099  | 1.790233  | -1.803702 |
| H | 2.188349  | -0.060096 | -2.966035 |
| H | 1.428327  | -1.517798 | -2.303988 |
| H | 2.921746  | -1.646437 | -3.256911 |
| H | 4.494219  | 0.689650  | -2.071304 |
| H | 5.116273  | -0.945302 | -2.328147 |
| H | 5.265237  | -0.186995 | -0.737508 |
| H | 3.835221  | -3.000857 | -1.427152 |
| H | 2.540658  | -2.743721 | -0.238260 |
| H | 4.216614  | -2.312522 | 0.156238  |
| H | 2.310146  | 2.299451  | 1.995321  |
| H | 2.485636  | 1.350200  | 3.484920  |
| H | 1.069538  | 1.119278  | 2.433262  |
| H | 2.790301  | -1.033091 | 3.489639  |
| H | 3.255518  | -1.954825 | 2.054054  |
| H | 1.575138  | -1.454838 | 2.254517  |
| H | 4.728199  | 0.627550  | 2.822865  |
| H | 4.695139  | 1.410494  | 1.235326  |
| H | 5.025273  | -0.331342 | 1.368947  |
| H | 0.229740  | -2.952665 | -1.426227 |

1, Ni-(O)-formate el energy= -1312.20973375

|    |           |           |           |
|----|-----------|-----------|-----------|
| Ni | -0.017168 | -0.172096 | 0.105042  |
| P  | -2.253816 | -0.069356 | 0.107649  |
| P  | 2.211499  | 0.087142  | -0.030996 |
| O  | 0.038524  | -2.032106 | 0.700592  |
| O  | 0.143637  | -3.120124 | -1.282423 |
| C  | -3.183926 | -1.023135 | 1.462435  |
| C  | -2.258784 | -0.957841 | 2.697578  |
| C  | -3.380027 | -2.496655 | 1.071416  |
| C  | -4.546636 | -0.396511 | 1.809786  |
| C  | -3.009118 | -0.286196 | -1.621592 |
| C  | -2.649608 | -1.677895 | -2.173045 |
| C  | -4.532326 | -0.084680 | -1.645683 |
| C  | -2.336935 | 0.773622  | -2.519636 |
| C  | -2.532200 | 1.718298  | 0.541423  |
| C  | -1.293870 | 2.477481  | 0.122668  |
| C  | -1.347031 | 3.871900  | 0.007391  |
| C  | -0.204787 | 4.597357  | -0.329029 |
| C  | 0.993348  | 3.919280  | -0.549619 |
| C  | 1.049391  | 2.523505  | -0.449437 |
| C  | -0.095161 | 1.759357  | -0.115005 |
| C  | 2.355733  | 1.813000  | -0.714313 |
| C  | 3.244800  | -0.948703 | -1.244271 |
| C  | 2.356726  | -1.096175 | -2.498935 |
| C  | 4.566661  | -0.259630 | -1.633515 |
| C  | 3.551642  | -2.343505 | -0.675464 |
| C  | 2.956057  | 0.161150  | 1.715324  |
| C  | 2.172716  | 1.262241  | 2.461264  |
| C  | 2.698737  | -1.180455 | 2.429773  |
| C  | 4.454936  | 0.494868  | 1.741080  |
| C  | 0.097439  | -3.072559 | -0.054438 |
| H  | -1.315936 | -1.474835 | 2.498127  |
| H  | -2.758601 | -1.441918 | 3.548618  |
| H  | -2.034354 | 0.075605  | 2.992502  |
| H  | -4.117206 | -2.614037 | 0.270219  |
| H  | -3.751422 | -3.052247 | 1.944045  |
| H  | -2.440579 | -2.957106 | 0.755243  |
| H  | -5.002854 | -0.970593 | 2.628679  |
| H  | -5.243740 | -0.413457 | 0.967150  |
| H  | -4.452291 | 0.639679  | 2.152837  |
| H  | -1.577195 | -1.886072 | -2.106758 |
| H  | -2.949089 | -1.727829 | -3.229611 |
| H  | -3.174089 | -2.481098 | -1.647091 |
| H  | -4.836748 | 0.874920  | -1.209733 |
| H  | -5.058573 | -0.886708 | -1.117562 |

|   |           |           |           |
|---|-----------|-----------|-----------|
| H | -4.880463 | -0.097353 | -2.688108 |
| H | -2.705333 | 0.645499  | -3.546777 |
| H | -1.248260 | 0.657037  | -2.527464 |
| H | -2.559568 | 1.798991  | -2.205581 |
| H | -3.451341 | 2.125392  | 0.101274  |
| H | -2.657205 | 1.772028  | 1.630681  |
| H | -2.286244 | 4.392528  | 0.192222  |
| H | -0.246874 | 5.681284  | -0.413732 |
| H | 1.893248  | 4.477234  | -0.806952 |
| H | 3.220606  | 2.353467  | -0.308934 |
| H | 2.525085  | 1.721745  | -1.794411 |
| H | 2.078150  | -0.121870 | -2.921745 |
| H | 1.446116  | -1.659631 | -2.273623 |
| H | 2.919401  | -1.639449 | -3.271425 |
| H | 4.406464  | 0.716659  | -2.103603 |
| H | 5.087828  | -0.890954 | -2.366810 |
| H | 5.238440  | -0.121528 | -0.781604 |
| H | 3.987134  | -2.964003 | -1.470671 |
| H | 2.651191  | -2.849910 | -0.321320 |
| H | 4.279476  | -2.298112 | 0.142247  |
| H | 2.302206  | 2.252073  | 2.010262  |
| H | 2.532435  | 1.311332  | 3.498429  |
| H | 1.098951  | 1.045764  | 2.478563  |
| H | 2.937852  | -1.069377 | 3.496881  |
| H | 3.326068  | -1.984470 | 2.033453  |
| H | 1.655063  | -1.494572 | 2.331504  |
| H | 4.776013  | 0.642548  | 2.782008  |
| H | 4.687687  | 1.415548  | 1.191871  |
| H | 5.060651  | -0.316967 | 1.325426  |
| H | 0.105768  | -4.019426 | 0.532279  |

74

1, Ni-(O)-hydroxyl    el energy= -1312.13316571

|    |           |           |           |
|----|-----------|-----------|-----------|
| Ni | 0.033219  | -0.238258 | 0.000464  |
| P  | -2.206556 | -0.038972 | -0.065580 |
| P  | 2.254102  | -0.024079 | 0.149656  |
| O  | 0.189463  | -2.123679 | -0.527937 |
| O  | -0.384699 | -3.062938 | 1.364042  |
| C  | 3.563023  | -2.493038 | 0.713271  |
| C  | -1.117949 | 2.441480  | -0.322793 |
| C  | -2.335538 | 1.676351  | -0.788355 |
| C  | -3.152500 | -1.134769 | -1.301444 |
| C  | -2.193361 | -1.305501 | -2.501170 |
| C  | -3.097321 | 0.108981  | 1.617456  |
| C  | -4.618942 | 0.273423  | 1.469456  |

|   |           |           |           |
|---|-----------|-----------|-----------|
| C | 3.016151  | 0.065102  | -1.592292 |
| C | 2.301125  | 1.215619  | -2.331401 |
| C | 3.268543  | -1.116087 | 1.331964  |
| C | 4.587054  | -0.441183 | 1.757374  |
| C | 2.388527  | -1.314780 | 2.584295  |
| C | 0.019780  | 1.706086  | 0.085447  |
| C | 0.018245  | -3.220912 | 0.075703  |
| C | -2.529119 | 1.346421  | 2.341593  |
| C | -4.459325 | -0.492903 | -1.804384 |
| C | 2.713994  | -1.246816 | -2.343837 |
| C | 0.011045  | 4.545515  | 0.094758  |
| C | -1.122552 | 3.841291  | -0.312546 |
| C | 1.153506  | 3.844875  | 0.483497  |
| C | 1.161347  | 2.444622  | 0.477916  |
| C | 2.411648  | 1.689107  | 0.868534  |
| C | 4.528479  | 0.335868  | -1.588010 |
| C | -3.449770 | -2.517462 | -0.697078 |
| C | -2.793710 | -1.123567 | 2.488247  |
| H | -0.474431 | -2.089458 | 1.536659  |
| H | 2.660813  | -2.968678 | 0.315398  |
| H | 4.308110  | -2.427912 | -0.086907 |
| H | -3.278982 | 2.175186  | -0.532964 |
| H | 2.474350  | 1.576373  | 1.958998  |
| H | 3.330347  | 2.199376  | 0.552243  |
| H | -2.694693 | -1.905521 | -3.273303 |
| H | -1.929393 | -0.341987 | -2.956790 |
| H | -5.210133 | -0.382865 | -1.018283 |
| H | -4.290643 | 0.490725  | -2.257087 |
| H | -4.889666 | -1.139252 | -2.582052 |
| H | -4.190288 | -2.462260 | 0.108940  |
| H | -3.866026 | -3.166819 | -1.479681 |
| H | -2.548372 | -3.003073 | -0.312065 |
| H | -5.051179 | 0.497035  | 2.454810  |
| H | -5.097876 | -0.639599 | 1.102523  |
| H | -3.004233 | -2.073805 | 1.990826  |
| H | -1.743921 | -1.130126 | 2.801002  |
| H | -3.402913 | -1.076484 | 3.401571  |
| H | -1.438459 | 1.302916  | 2.422772  |
| H | -2.950793 | 1.380108  | 3.355923  |
| H | 2.681839  | 1.257553  | -3.361236 |
| H | 1.218565  | 1.057355  | -2.370386 |
| H | 2.475037  | 2.191374  | -1.865878 |
| H | 2.989138  | -1.120736 | -3.400396 |
| H | 1.655347  | -1.513812 | -2.282328 |
| H | 2.034888  | -0.364206 | 3.004223  |

|   |           |           |           |
|---|-----------|-----------|-----------|
| H | 4.868311  | 0.494464  | -2.621158 |
| H | 4.790516  | 1.234000  | -1.014958 |
| H | 5.095349  | -0.509755 | -1.185928 |
| H | 4.417096  | 0.505929  | 2.281640  |
| H | 5.255037  | -0.248297 | 0.914100  |
| H | 1.522494  | -1.943053 | 2.364662  |
| H | 2.979526  | -1.819040 | 3.361345  |
| H | 3.974143  | -3.151672 | 1.490810  |
| H | 3.286126  | -2.091730 | -1.951265 |
| H | -4.885555 | 1.099158  | 0.799395  |
| H | -2.786630 | 2.284298  | 1.839535  |
| H | 5.115979  | -1.108290 | 2.452321  |
| H | -1.272234 | -1.813610 | -2.206357 |
| H | -2.323784 | 1.563228  | -1.880317 |
| H | -2.013103 | 4.382875  | -0.630032 |
| H | 2.045659  | 4.390019  | 0.790140  |
| H | 0.006726  | 5.633503  | 0.102509  |

74

1, TS-2-3 e1 energy= -1312.17243620

|    |           |           |           |
|----|-----------|-----------|-----------|
| Ni | 0.000002  | 0.092666  | -0.000082 |
| H  | 0.000079  | 1.662417  | -0.000034 |
| C  | -0.000080 | -1.856984 | -0.000147 |
| C  | 1.173460  | -2.591888 | -0.291040 |
| C  | 2.432612  | -1.829330 | -0.644223 |
| C  | 1.173182  | -3.992178 | -0.283416 |
| H  | 2.088953  | -4.538427 | -0.508456 |
| C  | -0.000199 | -4.693276 | -0.000245 |
| H  | -0.000244 | -5.781486 | -0.000283 |
| C  | -1.173520 | -3.992100 | 0.282979  |
| H  | -2.089336 | -4.538287 | 0.507987  |
| C  | -1.173681 | -2.591810 | 0.290702  |
| C  | -2.432758 | -1.829170 | 0.643970  |
| P  | 2.189649  | -0.059096 | -0.091059 |
| P  | -2.189668 | -0.058921 | 0.090913  |
| C  | 3.146846  | 0.961246  | -1.377549 |
| C  | 2.191100  | 1.052759  | -2.586836 |
| C  | 4.465758  | 0.292691  | -1.808212 |
| C  | 3.443348  | 2.383107  | -0.875000 |
| C  | 2.947653  | 0.043960  | 1.645358  |
| C  | 4.474774  | -0.121046 | 1.661817  |
| C  | 2.543204  | 1.389141  | 2.278852  |
| C  | 2.303456  | -1.088574 | 2.471774  |
| C  | -2.947705 | 0.044287  | -1.645483 |
| C  | -2.303627 | -1.088261 | -2.471974 |

|   |           |           |           |
|---|-----------|-----------|-----------|
| C | -2.543148 | 1.389464  | -2.278913 |
| C | -4.474840 | -0.120583 | -1.661917 |
| C | -3.146764 | 0.961407  | 1.377491  |
| C | -4.465721 | 0.292922  | 1.808128  |
| C | -2.190990 | 1.052758  | 2.586768  |
| C | -3.443166 | 2.383325  | 0.875047  |
| H | 3.341655  | -2.281638 | -0.226504 |
| H | 2.567764  | -1.810176 | -1.733415 |
| H | -2.567869 | -1.810074 | 1.733168  |
| H | -3.341854 | -2.281376 | 0.226256  |
| H | 2.699619  | 1.565253  | -3.415602 |
| H | 1.884860  | 0.061854  | -2.946923 |
| H | 1.292300  | 1.622155  | -2.330786 |
| H | 5.165668  | 0.173958  | -0.975412 |
| H | 4.305887  | -0.691412 | -2.261250 |
| H | 4.954146  | 0.923542  | -2.564102 |
| H | 4.189034  | 2.389845  | -0.073011 |
| H | 3.848699  | 2.976397  | -1.706321 |
| H | 2.542211  | 2.891318  | -0.524771 |
| H | 4.826308  | -0.151443 | 2.702845  |
| H | 4.794174  | -1.053706 | 1.180403  |
| H | 4.985397  | 0.712805  | 1.169168  |
| H | 3.009535  | 2.244570  | 1.782299  |
| H | 1.459325  | 1.538184  | 2.242541  |
| H | 2.859566  | 1.402156  | 3.331352  |
| H | 2.556096  | -2.083817 | 2.090509  |
| H | 1.211664  | -1.005828 | 2.480037  |
| H | 2.665404  | -1.019948 | 3.507068  |
| H | -2.665586 | -1.019542 | -3.507258 |
| H | -1.211827 | -1.005618 | -2.480250 |
| H | -2.556353 | -2.083503 | -2.090763 |
| H | -3.009405 | 2.244908  | -1.782317 |
| H | -2.859507 | 1.402558  | -3.331414 |
| H | -1.459256 | 1.538409  | -2.242593 |
| H | -4.826401 | -0.150888 | -2.702938 |
| H | -4.794310 | -1.053243 | -1.180550 |
| H | -4.985378 | 0.713284  | -1.169207 |
| H | -4.305916 | -0.691223 | 2.261096  |
| H | -4.954049 | 0.923759  | 2.564069  |
| H | -5.165655 | 0.174299  | 0.975332  |
| H | -1.292152 | 1.622108  | 2.330748  |
| H | -2.699459 | 1.565227  | 3.415581  |
| H | -1.884821 | 0.061803  | 2.946775  |
| H | -3.848494 | 2.976576  | 1.706406  |
| H | -2.541988 | 2.891504  | 0.524880  |



|   |           |          |           |
|---|-----------|----------|-----------|
| H | -4.188833 | 2.390175 | 0.073042  |
| C | 0.000243  | 3.277243 | 0.000247  |
| O | 0.124226  | 3.549967 | -1.152142 |
| O | -0.123672 | 3.549605 | 1.152730  |

74

1, TS-3-4      el energy= -1312.16859221

|    |           |           |           |
|----|-----------|-----------|-----------|
| Ni | 0.043420  | -0.096422 | 0.081916  |
| H  | 0.316967  | -1.734321 | -0.584701 |
| C  | 0.014200  | 1.829575  | 0.091754  |
| C  | -1.157018 | 2.534899  | -0.268261 |
| C  | -2.362161 | 1.756788  | -0.731996 |
| C  | -1.195149 | 3.934128  | -0.238797 |
| H  | -2.113778 | 4.452162  | -0.511531 |
| C  | -0.064176 | 4.665598  | 0.123169  |
| H  | -0.096972 | 5.752746  | 0.143615  |
| C  | 1.113506  | 3.990956  | 0.442031  |
| H  | 2.008195  | 4.553860  | 0.705536  |
| C  | 1.158381  | 2.591347  | 0.425297  |
| C  | 2.448934  | 1.875578  | 0.744519  |
| P  | -2.209868 | 0.020540  | -0.077326 |
| P  | 2.267244  | 0.130565  | 0.125726  |
| C  | -3.143933 | -1.028431 | -1.368408 |
| C  | -2.129101 | -1.283037 | -2.504111 |
| C  | -4.365971 | -0.276326 | -1.932606 |
| C  | -3.606095 | -2.381977 | -0.802952 |
| C  | -3.072826 | 0.045491  | 1.616208  |
| C  | -4.566651 | 0.394114  | 1.515987  |
| C  | -2.893294 | -1.313318 | 2.320790  |
| C  | -2.350807 | 1.120335  | 2.455040  |
| C  | 2.950586  | 0.137789  | -1.652136 |
| C  | 2.288099  | 1.320996  | -2.387265 |
| C  | 2.522373  | -1.162208 | -2.359650 |
| C  | 4.477554  | 0.292468  | -1.723275 |
| C  | 3.321080  | -0.888035 | 1.337260  |
| C  | 4.710070  | -0.266286 | 1.576932  |
| C  | 2.539924  | -0.891982 | 2.669776  |
| C  | 3.471253  | -2.336521 | 0.844695  |
| H  | -3.310896 | 2.234431  | -0.459819 |
| H  | -2.350875 | 1.679735  | -1.826887 |
| H  | 2.609417  | 1.822330  | 1.828325  |
| H  | 3.326246  | 2.380485  | 0.320563  |
| H  | -2.652968 | -1.731544 | -3.359803 |
| H  | -1.654403 | -0.356553 | -2.854703 |
| H  | -1.351740 | -1.981290 | -2.180589 |

|   |           |           |           |
|---|-----------|-----------|-----------|
| H | -5.087053 | -0.003526 | -1.156009 |
| H | -4.086833 | 0.633413  | -2.474616 |
| H | -4.881218 | -0.934060 | -2.645990 |
| H | -4.419723 | -2.263924 | -0.079485 |
| H | -3.993143 | -2.988822 | -1.633587 |
| H | -2.786356 | -2.942869 | -0.346393 |
| H | -4.979399 | 0.488632  | 2.530128  |
| H | -4.743758 | 1.346440  | 1.001276  |
| H | -5.137116 | -0.387463 | 1.003924  |
| H | -3.475151 | -2.107433 | 1.845659  |
| H | -1.846268 | -1.629228 | 2.334474  |
| H | -3.248463 | -1.218124 | 3.356761  |
| H | -2.447853 | 2.125596  | 2.031667  |
| H | -1.282463 | 0.898955  | 2.550191  |
| H | -2.790948 | 1.131309  | 3.461625  |
| H | 2.593500  | 1.292758  | -3.442314 |
| H | 1.196085  | 1.262903  | -2.342180 |
| H | 2.586467  | 2.291658  | -1.976885 |
| H | 2.904585  | -2.060697 | -1.866062 |
| H | 2.908398  | -1.154671 | -3.388380 |
| H | 1.431665  | -1.246424 | -2.407605 |
| H | 4.775782  | 0.432395  | -2.771652 |
| H | 4.834978  | 1.163471  | -1.160691 |
| H | 4.996994  | -0.596781 | -1.352558 |
| H | 4.647448  | 0.776613  | 1.908316  |
| H | 5.209114  | -0.831331 | 2.376322  |
| H | 5.354270  | -0.307416 | 0.695622  |
| H | 1.557115  | -1.351847 | 2.543811  |
| H | 3.111793  | -1.472634 | 3.407030  |
| H | 2.414920  | 0.118397  | 3.079202  |
| H | 3.990623  | -2.922531 | 1.615339  |
| H | 2.498117  | -2.805230 | 0.675840  |
| H | 4.067327  | -2.402061 | -0.072350 |
| C | -0.106659 | -2.552960 | 0.180051  |
| O | -0.567809 | -3.525225 | -0.405049 |
| O | 0.026911  | -2.233237 | 1.381518  |

74

1, TS-4i-4 el energy= -1312.19628880

|    |           |           |           |
|----|-----------|-----------|-----------|
| Ni | -0.000916 | -0.018186 | -0.079909 |
| P  | -2.224965 | 0.199017  | 0.002582  |
| P  | 2.244946  | 0.140452  | -0.188210 |
| O  | -0.019005 | -1.926529 | 0.335259  |
| O  | 0.861713  | -3.697421 | -0.754903 |
| C  | -3.157619 | -0.732955 | 1.370532  |

|   |           |           |           |
|---|-----------|-----------|-----------|
| C | -2.180132 | -0.741839 | 2.566275  |
| C | -3.446813 | -2.186939 | 0.968740  |
| C | -4.469855 | -0.038345 | 1.777542  |
| C | -3.036997 | 0.037925  | -1.706221 |
| C | -2.638789 | -1.318557 | -2.316158 |
| C | -4.566134 | 0.181372  | -1.672383 |
| C | -2.441075 | 1.151795  | -2.591716 |
| C | -2.407290 | 1.989912  | 0.466575  |
| C | -1.145643 | 2.689237  | 0.014541  |
| C | -1.131048 | 4.085102  | -0.093581 |
| C | 0.036939  | 4.753050  | -0.458840 |
| C | 1.192882  | 4.016301  | -0.714778 |
| C | 1.181746  | 2.619097  | -0.621590 |
| C | 0.008517  | 1.913702  | -0.259489 |
| C | 2.441858  | 1.842694  | -0.917531 |
| C | 3.305131  | -0.951557 | -1.330115 |
| C | 2.409014  | -1.238447 | -2.553695 |
| C | 4.584103  | -0.224850 | -1.792020 |
| C | 3.691023  | -2.283590 | -0.667176 |
| C | 2.939550  | 0.236381  | 1.576170  |
| C | 2.185742  | 1.378968  | 2.287811  |
| C | 2.613232  | -1.083040 | 2.304863  |
| C | 4.448321  | 0.521066  | 1.626631  |
| C | -0.072993 | -2.997364 | -0.387929 |
| H | -1.272720 | -1.297800 | 2.312144  |
| H | -2.664384 | -1.224975 | 3.426533  |
| H | -1.893670 | 0.271801  | 2.875692  |
| H | -4.181713 | -2.257007 | 0.159405  |
| H | -3.861486 | -2.721398 | 1.834854  |
| H | -2.532730 | -2.701595 | 0.664802  |
| H | -4.923932 | -0.597805 | 2.607460  |
| H | -5.198912 | -0.009130 | 0.962485  |
| H | -4.308394 | 0.987024  | 2.127464  |
| H | -1.549583 | -1.415937 | -2.379568 |
| H | -3.046757 | -1.392287 | -3.333811 |
| H | -3.019477 | -2.168004 | -1.741952 |
| H | -4.881596 | 1.119142  | -1.198644 |
| H | -5.047005 | -0.649367 | -1.146103 |
| H | -4.952988 | 0.186269  | -2.701179 |
| H | -2.820415 | 1.027451  | -3.615423 |
| H | -1.347747 | 1.102558  | -2.620183 |
| H | -2.718816 | 2.154413  | -2.249897 |
| H | -3.320240 | 2.447026  | 0.063736  |
| H | -2.491701 | 2.034054  | 1.560112  |
| H | -2.037039 | 4.651515  | 0.119868  |

|   |           |           |           |
|---|-----------|-----------|-----------|
| H | 0.047861  | 5.838098  | -0.538074 |
| H | 2.112877  | 4.529161  | -0.993392 |
| H | 3.347366  | 2.355322  | -0.568807 |
| H | 2.556095  | 1.710472  | -2.001163 |
| H | 2.019818  | -0.317689 | -3.009051 |
| H | 1.570243  | -1.882631 | -2.277148 |
| H | 2.999072  | -1.762699 | -3.318392 |
| H | 4.371603  | 0.674657  | -2.379687 |
| H | 5.156870  | -0.906158 | -2.436302 |
| H | 5.231176  | 0.058606  | -0.956264 |
| H | 4.179370  | -2.916295 | -1.422191 |
| H | 2.811557  | -2.825808 | -0.309251 |
| H | 4.408905  | -2.139077 | 0.147733  |
| H | 2.358382  | 2.354681  | 1.820979  |
| H | 2.532175  | 1.433666  | 3.329242  |
| H | 1.104801  | 1.202469  | 2.293340  |
| H | 2.823605  | -0.960955 | 3.376822  |
| H | 3.214979  | -1.918525 | 1.938588  |
| H | 1.561886  | -1.359989 | 2.178354  |
| H | 4.758619  | 0.646441  | 2.673732  |
| H | 4.713047  | 1.442990  | 1.093673  |
| H | 5.036537  | -0.300951 | 1.207288  |
| H | -1.107399 | -3.313654 | -0.668267 |

74

1, TS-2-5 el energy= -1312.10294254

|    |           |           |           |
|----|-----------|-----------|-----------|
| Ni | -0.016344 | -0.246896 | -0.085801 |
| P  | -2.219701 | -0.031313 | -0.103655 |
| P  | 2.200251  | -0.048726 | 0.126316  |
| O  | 0.249332  | -2.236934 | -1.238939 |
| O  | -0.191448 | -3.169954 | 0.700932  |
| C  | 3.476385  | -2.483892 | 0.877904  |
| C  | -1.172575 | 2.454332  | -0.451615 |
| C  | -2.423799 | 1.687749  | -0.811103 |
| C  | -3.285711 | -1.107135 | -1.258445 |
| C  | -2.479302 | -1.233974 | -2.569630 |
| C  | -2.938806 | 0.076792  | 1.660795  |
| C  | -4.460305 | 0.296322  | 1.678289  |
| C  | 3.134726  | 0.040896  | -1.538063 |
| C  | 2.446446  | 1.150788  | -2.360544 |
| C  | 3.130056  | -1.090131 | 1.425620  |
| C  | 4.412219  | -0.402770 | 1.934007  |
| C  | 2.155780  | -1.251078 | 2.611598  |
| C  | -0.021562 | 1.718458  | -0.085760 |
| C  | 0.093000  | -3.198185 | -0.499471 |

|   |           |           |           |
|---|-----------|-----------|-----------|
| C | -2.253869 | 1.266696  | 2.364052  |
| C | -4.647159 | -0.466631 | -1.591770 |
| C | 2.999488  | -1.279551 | -2.318486 |
| C | -0.022753 | 4.555765  | -0.078357 |
| C | -1.169881 | 3.854419  | -0.453164 |
| C | 1.116030  | 3.852866  | 0.317891  |
| C | 1.114924  | 2.452534  | 0.323844  |
| C | 2.325783  | 1.688326  | 0.803859  |
| C | 4.625077  | 0.383003  | -1.376869 |
| C | -3.506786 | -2.505234 | -0.657310 |
| C | -2.592692 | -1.200496 | 2.447985  |
| H | -0.256806 | -1.707227 | 0.833224  |
| H | 2.608178  | -2.977313 | 0.430391  |
| H | 4.277444  | -2.441165 | 0.132223  |
| H | -3.339549 | 2.182790  | -0.463211 |
| H | 2.307558  | 1.604285  | 1.898500  |
| H | 3.272217  | 2.178186  | 0.543850  |
| H | -3.058568 | -1.835408 | -3.284269 |
| H | -2.300652 | -0.257126 | -3.036561 |
| H | -5.302032 | -0.378924 | -0.722014 |
| H | -4.538050 | 0.527205  | -2.040020 |
| H | -5.160632 | -1.100890 | -2.328090 |
| H | -4.205136 | -2.476513 | 0.186737  |
| H | -3.944459 | -3.161687 | -1.422123 |
| H | -2.574722 | -2.963252 | -0.314752 |
| H | -4.779651 | 0.502778  | 2.709349  |
| H | -5.006163 | -0.590154 | 1.340500  |
| H | -2.994772 | -2.107148 | 1.987841  |
| H | -1.510066 | -1.327337 | 2.536256  |
| H | -3.015374 | -1.119134 | 3.459378  |
| H | -1.164430 | 1.165640  | 2.355561  |
| H | -2.593066 | 1.295479  | 3.409003  |
| H | 2.910236  | 1.186336  | -3.356153 |
| H | 1.376705  | 0.952800  | -2.484160 |
| H | 2.547816  | 2.140684  | -1.904101 |
| H | 3.478917  | -1.155125 | -3.299984 |
| H | 1.954625  | -1.554760 | -2.471054 |
| H | 1.802904  | -0.284799 | 2.994389  |
| H | 5.055254  | 0.574890  | -2.369928 |
| H | 4.793041  | 1.279940  | -0.769203 |
| H | 5.187927  | -0.445524 | -0.934877 |
| H | 4.205725  | 0.568462  | 2.396800  |
| H | 5.154122  | -0.253259 | 1.145920  |
| H | 1.283582  | -1.844881 | 2.328923  |
| H | 2.674347  | -1.763545 | 3.433926  |

|   |           |           |           |
|---|-----------|-----------|-----------|
| H | 3.828886  | -3.117279 | 1.703764  |
| H | 3.493341  | -2.115546 | -1.815020 |
| H | -4.768153 | 1.149828  | 1.062535  |
| H | -2.500090 | 2.228511  | 1.902500  |
| H | 4.871565  | -1.038911 | 2.703581  |
| H | -1.514258 | -1.718268 | -2.409464 |
| H | -2.518475 | 1.577816  | -1.899178 |
| H | -2.067092 | 4.399345  | -0.745503 |
| H | 2.006541  | 4.396428  | 0.632518  |
| H | -0.020473 | 5.643863  | -0.082754 |

74

1,Ni-(H)-formate-isomer    el energy= -1312.17170586

|    |           |           |           |
|----|-----------|-----------|-----------|
| Ni | -0.000416 | -0.019632 | -0.255830 |
| H  | 0.087843  | -1.626818 | -0.358179 |
| C  | -0.063491 | 1.897247  | -0.032751 |
| C  | -1.299003 | 2.583451  | 0.052499  |
| C  | -2.567300 | 1.831757  | -0.284829 |
| C  | -1.350185 | 3.936054  | 0.408159  |
| H  | -2.312921 | 4.439787  | 0.487931  |
| C  | -0.173089 | 4.642595  | 0.660552  |
| H  | -0.215720 | 5.690506  | 0.950245  |
| C  | 1.058717  | 4.003406  | 0.519932  |
| H  | 1.980408  | 4.560717  | 0.684480  |
| C  | 1.117777  | 2.651037  | 0.158227  |
| C  | 2.455353  | 1.997899  | -0.109472 |
| P  | -2.210917 | 0.016312  | -0.057051 |
| P  | 2.204939  | 0.147796  | -0.146707 |
| C  | -3.273803 | -0.863610 | -1.360957 |
| C  | -2.475707 | -0.726618 | -2.676370 |
| C  | -4.657066 | -0.207844 | -1.532031 |
| C  | -3.455336 | -2.355951 | -1.032142 |
| C  | -2.746848 | -0.371941 | 1.722075  |
| C  | -4.269870 | -0.335181 | 1.922033  |
| C  | -2.185803 | -1.751356 | 2.113831  |
| C  | -2.099414 | 0.696896  | 2.625898  |
| C  | 3.239072  | -0.449858 | -1.625228 |
| C  | 2.345965  | -0.162922 | -2.852098 |
| C  | 3.514700  | -1.961134 | -1.557433 |
| C  | 4.577446  | 0.299789  | -1.761643 |
| C  | 2.852448  | -0.472687 | 1.525405  |
| C  | 4.367855  | -0.282773 | 1.692723  |
| C  | 2.105967  | 0.346157  | 2.598133  |
| C  | 2.478662  | -1.955838 | 1.708583  |
| H  | -3.438033 | 2.168241  | 0.291627  |

|   |           |           |           |
|---|-----------|-----------|-----------|
| H | -2.814473 | 1.980731  | -1.343923 |
| H | 3.234595  | 2.296627  | 0.602677  |
| H | 2.811966  | 2.303559  | -1.100459 |
| H | -3.076384 | -1.128378 | -3.504418 |
| H | -2.246993 | 0.321133  | -2.912199 |
| H | -1.535233 | -1.285075 | -2.636551 |
| H | -5.253721 | -0.240511 | -0.615501 |
| H | -4.584934 | 0.836158  | -1.856049 |
| H | -5.212526 | -0.752053 | -2.308444 |
| H | -4.147464 | -2.506681 | -0.196336 |
| H | -3.884983 | -2.860915 | -1.908104 |
| H | -2.515366 | -2.857500 | -0.789335 |
| H | -4.496488 | -0.468719 | 2.989229  |
| H | -4.704530 | 0.623294  | 1.612054  |
| H | -4.778079 | -1.136888 | 1.377723  |
| H | -2.639502 | -2.567938 | 1.547277  |
| H | -1.106017 | -1.811022 | 1.946303  |
| H | -2.382127 | -1.930181 | 3.180363  |
| H | -2.501356 | 1.699380  | 2.444690  |
| H | -1.016190 | 0.747800  | 2.483490  |
| H | -2.297286 | 0.438386  | 3.675136  |
| H | 2.904356  | -0.397223 | -3.769335 |
| H | 1.446918  | -0.787647 | -2.827827 |
| H | 2.042646  | 0.890992  | -2.906008 |
| H | 4.203007  | -2.218607 | -0.745238 |
| H | 3.989658  | -2.270994 | -2.498682 |
| H | 2.595208  | -2.541864 | -1.455561 |
| H | 5.111930  | -0.092926 | -2.637625 |
| H | 4.444606  | 1.375057  | -1.921070 |
| H | 5.225916  | 0.161818  | -0.890757 |
| H | 4.677706  | 0.756856  | 1.529767  |
| H | 4.657601  | -0.556062 | 2.717091  |
| H | 4.937104  | -0.922178 | 1.010329  |
| H | 1.023180  | 0.208757  | 2.515237  |
| H | 2.417154  | -0.000361 | 3.593087  |
| H | 2.312515  | 1.420042  | 2.535298  |
| H | 2.746968  | -2.268525 | 2.727422  |
| H | 1.407311  | -2.130345 | 1.570828  |
| H | 3.008745  | -2.610924 | 1.012197  |
| C | 0.015324  | -2.839309 | -0.856002 |
| O | -0.274417 | -3.591172 | 0.050158  |
| O | 0.263554  | -2.814818 | -2.047075 |

74

1,Ni-carboxylic acid el energy= -1312.17618615



|    |           |           |           |
|----|-----------|-----------|-----------|
| Ni | -0.006358 | -0.276533 | 0.008943  |
| H  | -0.398751 | -2.550524 | 1.515828  |
| C  | -0.004665 | 1.746926  | 0.039430  |
| C  | -1.146009 | 2.486961  | -0.345161 |
| C  | -2.401691 | 1.724901  | -0.713291 |
| C  | -1.120463 | 3.886122  | -0.405491 |
| H  | -2.011793 | 4.436902  | -0.705680 |
| C  | 0.050039  | 4.579929  | -0.094088 |
| H  | 0.071592  | 5.666643  | -0.147509 |
| C  | 1.193545  | 3.874093  | 0.286496  |
| H  | 2.105424  | 4.416010  | 0.536521  |
| C  | 1.164084  | 2.476033  | 0.359532  |
| C  | 2.379382  | 1.699470  | 0.815396  |
| P  | -2.207569 | -0.021987 | -0.073220 |
| P  | 2.197440  | -0.052558 | 0.171093  |
| C  | -3.242991 | -1.065972 | -1.280357 |
| C  | -2.395494 | -1.146997 | -2.570389 |
| C  | -4.603951 | -0.434131 | -1.627805 |
| C  | -3.451322 | -2.486496 | -0.727467 |
| C  | -2.964573 | 0.025737  | 1.679801  |
| C  | -4.498459 | 0.114095  | 1.688606  |
| C  | -2.508569 | -1.226930 | 2.450919  |
| C  | -2.391434 | 1.259089  | 2.407222  |
| C  | 2.983578  | -0.021330 | -1.575779 |
| C  | 1.846594  | 0.377200  | -2.542337 |
| C  | 3.482706  | -1.417562 | -1.983996 |
| C  | 4.129266  | 0.996762  | -1.693847 |
| C  | 3.191140  | -1.086671 | 1.427837  |
| C  | 4.628992  | -0.563255 | 1.581500  |
| C  | 2.433646  | -0.947782 | 2.766999  |
| C  | 3.216654  | -2.587296 | 1.080712  |
| H  | -3.319027 | 2.201333  | -0.342476 |
| H  | -2.505800 | 1.656656  | -1.804001 |
| H  | 2.397125  | 1.639684  | 1.910429  |
| H  | 3.324391  | 2.164071  | 0.515710  |
| H  | -2.953647 | -1.719934 | -3.324152 |
| H  | -2.198961 | -0.154498 | -2.995552 |
| H  | -1.438499 | -1.646506 | -2.400732 |
| H  | -5.283737 | -0.389220 | -0.773596 |
| H  | -4.496782 | 0.578228  | -2.033564 |
| H  | -5.088506 | -1.045295 | -2.402159 |
| H  | -4.129977 | -2.494710 | 0.133459  |
| H  | -3.905774 | -3.112767 | -1.507552 |
| H  | -2.508887 | -2.958051 | -0.432811 |
| H  | -4.845001 | 0.259683  | 2.721564  |

|   |           |           |           |
|---|-----------|-----------|-----------|
| H | -4.864244 | 0.961818  | 1.097377  |
| H | -4.968875 | -0.799220 | 1.311506  |
| H | -2.767471 | -2.161281 | 1.943619  |
| H | -1.422448 | -1.197758 | 2.605451  |
| H | -2.978597 | -1.240008 | 3.444102  |
| H | -2.729145 | 2.200817  | 1.962526  |
| H | -1.297359 | 1.263329  | 2.395777  |
| H | -2.731299 | 1.239673  | 3.452389  |
| H | 2.253473  | 0.438369  | -3.562243 |
| H | 1.053905  | -0.378807 | -2.532034 |
| H | 1.408362  | 1.346765  | -2.286254 |
| H | 4.391487  | -1.704264 | -1.443938 |
| H | 3.732979  | -1.397603 | -3.053997 |
| H | 2.712564  | -2.180904 | -1.836783 |
| H | 4.574729  | 0.915218  | -2.695107 |
| H | 3.772975  | 2.026521  | -1.579917 |
| H | 4.926937  | 0.822920  | -0.962372 |
| H | 4.659557  | 0.502773  | 1.836246  |
| H | 5.136290  | -1.111955 | 2.387808  |
| H | 5.212204  | -0.713479 | 0.666185  |
| H | 1.392761  | -1.276938 | 2.662766  |
| H | 2.915338  | -1.585288 | 3.520550  |
| H | 2.428374  | 0.075425  | 3.156925  |
| H | 3.696052  | -3.124660 | 1.911501  |
| H | 2.211632  | -2.998061 | 0.955676  |
| H | 3.790578  | -2.803522 | 0.178806  |
| C | 0.068855  | -2.188412 | -0.299781 |
| O | -0.185791 | -3.086500 | 0.738468  |
| O | 0.331403  | -2.687233 | -1.376763 |

74

1,TS-3i-6 el energy= -1312.10442277

|    |           |           |           |
|----|-----------|-----------|-----------|
| Ni | -0.055370 | -0.004629 | 0.230834  |
| H  | 0.203356  | -1.600027 | -0.255973 |
| C  | -0.125905 | 1.911306  | -0.273844 |
| C  | 0.975412  | 2.771021  | -0.064249 |
| C  | 2.253081  | 2.176916  | 0.485062  |
| C  | 0.901460  | 4.136633  | -0.367644 |
| H  | 1.761896  | 4.782299  | -0.193616 |
| C  | -0.274974 | 4.676162  | -0.889794 |
| H  | -0.334574 | 5.738426  | -1.118155 |
| C  | -1.370182 | 3.844356  | -1.132979 |
| H  | -2.279762 | 4.259565  | -1.566056 |
| C  | -1.291271 | 2.477638  | -0.840709 |
| C  | -2.433924 | 1.548418  | -1.178630 |

|   |           |           |           |
|---|-----------|-----------|-----------|
| P | 2.140297  | 0.321685  | 0.286749  |
| P | -2.255023 | 0.035303  | -0.092772 |
| C | 3.188784  | -0.345822 | 1.726706  |
| C | 2.344195  | -0.109836 | 2.998723  |
| C | 4.528065  | 0.397913  | 1.892876  |
| C | 3.446963  | -1.853045 | 1.556989  |
| C | 2.909715  | -0.049717 | -1.417234 |
| C | 4.427886  | 0.185501  | -1.461885 |
| C | 2.600328  | -1.505112 | -1.814700 |
| C | 2.227309  | 0.880229  | -2.441113 |
| C | -3.177077 | 0.492704  | 1.523393  |
| C | -2.147572 | 1.216560  | 2.418709  |
| C | -3.659321 | -0.765823 | 2.264399  |
| C | -4.369691 | 1.431145  | 1.271812  |
| C | -3.105153 | -1.345178 | -1.091612 |
| C | -4.551328 | -0.966047 | -1.452288 |
| C | -2.266111 | -1.511362 | -2.377963 |
| C | -3.082068 | -2.702006 | -0.362998 |
| H | 3.152355  | 2.586958  | 0.006858  |
| H | 2.350503  | 2.381281  | 1.558905  |
| H | -2.340824 | 1.210462  | -2.217732 |
| H | -3.417643 | 2.020478  | -1.092346 |
| H | 2.913276  | -0.465920 | 3.868713  |
| H | 2.135232  | 0.955087  | 3.161475  |
| H | 1.393300  | -0.645643 | 2.969219  |
| H | 5.209173  | 0.244444  | 1.052875  |
| H | 4.388537  | 1.476369  | 2.028768  |
| H | 5.027547  | 0.018500  | 2.795277  |
| H | 4.167866  | -2.050851 | 0.755231  |
| H | 3.875649  | -2.250275 | 2.487309  |
| H | 2.530431  | -2.412069 | 1.343797  |
| H | 4.773529  | 0.095620  | -2.501180 |
| H | 4.706398  | 1.185553  | -1.108713 |
| H | 4.974844  | -0.555990 | -0.871426 |
| H | 2.991187  | -2.236203 | -1.102335 |
| H | 1.522170  | -1.673491 | -1.901375 |
| H | 3.052326  | -1.711198 | -2.795009 |
| H | 2.444460  | 1.938044  | -2.259069 |
| H | 1.139749  | 0.760520  | -2.430989 |
| H | 2.597413  | 0.626489  | -3.444256 |
| H | -2.647231 | 1.526844  | 3.347897  |
| H | -1.323150 | 0.545458  | 2.678396  |
| H | -1.736868 | 2.108123  | 1.935175  |
| H | -4.503399 | -1.244045 | 1.755957  |
| H | -4.007212 | -0.467387 | 3.263177  |

|   |           |           |           |
|---|-----------|-----------|-----------|
| H | -2.852504 | -1.492138 | 2.397371  |
| H | -4.896822 | 1.592197  | 2.222306  |
| H | -4.047251 | 2.413533  | 0.909980  |
| H | -5.092709 | 1.018425  | 0.559276  |
| H | -4.613087 | -0.001714 | -1.970825 |
| H | -4.972953 | -1.729787 | -2.120867 |
| H | -5.190929 | -0.919833 | -0.563987 |
| H | -1.224028 | -1.753135 | -2.139053 |
| H | -2.676561 | -2.344537 | -2.964041 |
| H | -2.277126 | -0.623515 | -3.019109 |
| H | -3.500380 | -3.461478 | -1.038722 |
| H | -2.064210 | -3.008428 | -0.108470 |
| H | -3.685153 | -2.706064 | 0.546167  |
| C | -0.106896 | -1.802097 | 1.140769  |
| O | 0.214963  | -2.831350 | 0.415231  |
| O | -0.429414 | -1.745413 | 2.313341  |

74

1,Ni-carbonyl el energy= -1312.13529022

|    |           |           |           |
|----|-----------|-----------|-----------|
| Ni | -0.114849 | 0.029367  | 0.609651  |
| H  | -0.081870 | 0.126266  | 3.166606  |
| C  | -0.105406 | 1.866327  | -0.066901 |
| C  | 1.035777  | 2.657300  | 0.177783  |
| C  | 2.250188  | 1.977111  | 0.755606  |
| C  | 1.052544  | 4.012276  | -0.164720 |
| H  | 1.942383  | 4.608847  | 0.033353  |
| C  | -0.062462 | 4.602666  | -0.766438 |
| H  | -0.048795 | 5.659174  | -1.025873 |
| C  | -1.182495 | 3.824075  | -1.052172 |
| H  | -2.044646 | 4.271123  | -1.545992 |
| C  | -1.200563 | 2.462334  | -0.717123 |
| C  | -2.365339 | 1.585438  | -1.102358 |
| P  | 2.125874  | 0.182410  | 0.269049  |
| P  | -2.255506 | 0.053427  | -0.048334 |
| C  | 3.339205  | -0.692316 | 1.462671  |
| C  | 2.624329  | -0.834982 | 2.824440  |
| C  | 4.611541  | 0.152699  | 1.676473  |
| C  | 3.722757  | -2.098121 | 0.971675  |
| C  | 2.724755  | 0.021173  | -1.538402 |
| C  | 4.227328  | 0.289514  | -1.721428 |
| C  | 2.364058  | -1.389995 | -2.041873 |
| C  | 1.941130  | 1.031328  | -2.399707 |
| C  | -3.389630 | 0.390796  | 1.437707  |
| C  | -2.950572 | 1.757216  | 2.008656  |
| C  | -3.122502 | -0.673628 | 2.518441  |

|   |           |           |           |
|---|-----------|-----------|-----------|
| C | -4.881813 | 0.425039  | 1.074735  |
| C | -2.923951 | -1.330363 | -1.178567 |
| C | -4.154939 | -0.888915 | -1.993946 |
| C | -1.778095 | -1.667170 | -2.154198 |
| C | -3.273466 | -2.592466 | -0.372254 |
| H | 3.193682  | 2.448023  | 0.454245  |
| H | 2.180202  | 1.967626  | 1.849437  |
| H | -2.274518 | 1.276201  | -2.152234 |
| H | -3.339291 | 2.080566  | -1.002639 |
| H | 3.372262  | -1.080738 | 3.591446  |
| H | 2.082944  | 0.071541  | 3.111087  |
| H | 1.895255  | -1.651052 | 2.801217  |
| H | 5.153067  | 0.358101  | 0.749394  |
| H | 4.381873  | 1.108469  | 2.158924  |
| H | 5.291372  | -0.395709 | 2.343751  |
| H | 4.365863  | -2.078076 | 0.086044  |
| H | 4.278267  | -2.612093 | 1.768507  |
| H | 2.838600  | -2.705376 | 0.745571  |
| H | 4.469893  | 0.268157  | -2.793474 |
| H | 4.513314  | 1.277765  | -1.341264 |
| H | 4.852412  | -0.462980 | -1.231573 |
| H | 2.918675  | -2.181634 | -1.531450 |
| H | 1.293363  | -1.583607 | -1.912906 |
| H | 2.594119  | -1.461592 | -3.114101 |
| H | 2.164877  | 2.069347  | -2.136734 |
| H | 0.861159  | 0.891463  | -2.299438 |
| H | 2.218263  | 0.876787  | -3.452327 |
| H | -3.548824 | 1.955558  | 2.910192  |
| H | -1.886252 | 1.731096  | 2.285712  |
| H | -3.128809 | 2.579833  | 1.306867  |
| H | -3.353044 | -1.691756 | 2.188793  |
| H | -3.749206 | -0.457145 | 3.394632  |
| H | -2.075988 | -0.624265 | 2.832332  |
| H | -5.452633 | 0.753837  | 1.954285  |
| H | -5.095698 | 1.133565  | 0.264920  |
| H | -5.267284 | -0.558773 | 0.785046  |
| H | -3.939202 | -0.027131 | -2.634569 |
| H | -4.462518 | -1.714605 | -2.651110 |
| H | -5.008647 | -0.636212 | -1.360293 |
| H | -0.914510 | -2.084029 | -1.627103 |
| H | -2.127938 | -2.409274 | -2.885456 |
| H | -1.432668 | -0.786863 | -2.710045 |
| H | -3.508470 | -3.410517 | -1.067610 |
| H | -2.442626 | -2.925418 | 0.257759  |
| H | -4.150135 | -2.442320 | 0.265884  |

|   |           |           |          |
|---|-----------|-----------|----------|
| C | -0.082573 | -1.701489 | 1.041944 |
| O | 0.016996  | 0.839209  | 2.520692 |
| O | -0.046592 | -2.812446 | 1.340081 |

75

2,Ni-H    el energy= -1238.11351418

|    |           |           |           |
|----|-----------|-----------|-----------|
| Ni | 0.037177  | 0.024550  | 0.254367  |
| H  | 0.097177  | -0.039857 | 1.806875  |
| C  | -0.039086 | 0.102063  | -1.698719 |
| C  | 1.133803  | 0.264092  | -2.481375 |
| C  | 2.457996  | 0.417068  | -1.754657 |
| C  | 1.084427  | 0.305534  | -3.873930 |
| H  | 1.981381  | 0.430944  | -4.477764 |
| C  | -0.145897 | 0.196589  | -4.537462 |
| O  | -0.088483 | 0.253372  | -5.904535 |
| C  | -1.324020 | 0.041859  | -3.799325 |
| H  | -2.284319 | -0.049697 | -4.299497 |
| C  | -1.260427 | -0.008203 | -2.397761 |
| C  | -2.530552 | -0.211912 | -1.590925 |
| P  | 2.184055  | -0.170475 | 0.005902  |
| P  | -2.121192 | 0.230731  | 0.186009  |
| C  | 3.285464  | 0.954492  | 1.064864  |
| C  | 2.516095  | 2.291644  | 1.128497  |
| C  | 4.684721  | 1.199144  | 0.474856  |
| C  | 3.399236  | 0.392560  | 2.490922  |
| C  | 2.750610  | -1.984368 | 0.012888  |
| C  | 4.267634  | -2.164164 | -0.142514 |
| C  | 2.262776  | -2.647814 | 1.314544  |
| C  | 2.030965  | -2.668076 | -1.168802 |
| C  | -2.683465 | 2.035413  | 0.384947  |
| C  | -2.058149 | 2.817160  | -0.789545 |
| C  | -2.093529 | 2.592846  | 1.694078  |
| C  | -4.207717 | 2.219949  | 0.365483  |
| C  | -3.140865 | -0.982008 | 1.230281  |
| C  | -4.582896 | -1.181760 | 0.733877  |
| C  | -2.373007 | -2.317154 | 1.122119  |
| C  | -3.140692 | -0.541101 | 2.702731  |
| H  | 3.286038  | -0.101954 | -2.255396 |
| H  | 2.742297  | 1.476497  | -1.703706 |
| H  | -2.827758 | -1.269079 | -1.606195 |
| H  | -3.385650 | 0.354675  | -1.984222 |
| H  | 3.078627  | 3.009524  | 1.742220  |
| H  | 2.378911  | 2.738558  | 0.135828  |
| H  | 1.526165  | 2.146100  | 1.574700  |
| H  | 5.284818  | 0.285928  | 0.429859  |

|   |           |           |           |
|---|-----------|-----------|-----------|
| H | 4.636849  | 1.623607  | -0.534487 |
| H | 5.224235  | 1.918750  | 1.107252  |
| H | 4.034675  | -0.499371 | 2.530352  |
| H | 3.853380  | 1.148895  | 3.146682  |
| H | 2.411682  | 0.138855  | 2.893206  |
| H | 4.500344  | -3.232905 | -0.254162 |
| H | 4.655081  | -1.648595 | -1.030008 |
| H | 4.815544  | -1.800750 | 0.733352  |
| H | 2.761429  | -2.246211 | 2.201529  |
| H | 1.185330  | -2.500341 | 1.443471  |
| H | 2.468597  | -3.726941 | 1.272722  |
| H | 2.352564  | -2.276257 | -2.139608 |
| H | 0.945737  | -2.538202 | -1.104430 |
| H | 2.257118  | -3.743460 | -1.146826 |
| H | -2.281710 | 3.885817  | -0.662820 |
| H | -0.971363 | 2.688995  | -0.820956 |
| H | -2.454817 | 2.503257  | -1.760975 |
| H | -2.520596 | 2.116866  | 2.581609  |
| H | -2.301419 | 3.670533  | 1.757484  |
| H | -1.009370 | 2.441734  | 1.724980  |
| H | -4.446937 | 3.293089  | 0.362382  |
| H | -4.665502 | 1.778197  | -0.528385 |
| H | -4.684763 | 1.781814  | 1.248582  |
| H | -5.073351 | -1.953090 | 1.344887  |
| H | -5.181772 | -0.270010 | 0.811950  |
| H | -4.615798 | -1.521084 | -0.307798 |
| H | -1.350782 | -2.205837 | 1.500162  |
| H | -2.887993 | -3.085523 | 1.716138  |
| H | -2.315155 | -2.679426 | 0.088003  |
| H | -3.544531 | -1.350863 | 3.326831  |
| H | -2.123804 | -0.318575 | 3.046102  |
| H | -3.768204 | 0.342316  | 2.865992  |
| C | -1.304000 | 0.151878  | -6.618280 |
| H | -1.040240 | 0.221417  | -7.677368 |
| H | -1.805690 | -0.809575 | -6.431154 |
| H | -1.995008 | 0.969023  | -6.361412 |

74

2,Ni+ el energy= -1237.33199012

|    |           |          |           |
|----|-----------|----------|-----------|
| Ni | 0.007117  | 0.046686 | -0.002926 |
| C  | 0.252525  | 1.910810 | -0.048326 |
| C  | -0.813337 | 2.759222 | -0.429418 |
| C  | -2.147651 | 2.156387 | -0.811832 |
| C  | -0.626645 | 4.137439 | -0.452784 |
| H  | -1.433153 | 4.809364 | -0.736357 |

|   |           |           |           |
|---|-----------|-----------|-----------|
| C | 0.614535  | 4.699435  | -0.110012 |
| O | 0.682153  | 6.047253  | -0.172137 |
| C | 1.674609  | 3.862788  | 0.263857  |
| H | 2.641965  | 4.276661  | 0.530814  |
| C | 1.494189  | 2.473829  | 0.298688  |
| C | 2.635057  | 1.570925  | 0.715486  |
| P | -2.194346 | 0.442924  | -0.091801 |
| P | 2.235650  | -0.131332 | 0.082354  |
| C | -3.150696 | -0.627243 | -1.326672 |
| C | -2.181906 | -0.837117 | -2.511144 |
| C | -4.435576 | 0.054086  | -1.829655 |
| C | -3.478342 | -1.996578 | -0.707670 |
| C | -2.991140 | 0.578325  | 1.620122  |
| C | -4.508968 | 0.809496  | 1.558347  |
| C | -2.668069 | -0.707755 | 2.405809  |
| C | -2.316604 | 1.765736  | 2.337747  |
| C | 3.034776  | -0.290731 | -1.626825 |
| C | 2.688021  | 0.993384  | -2.408205 |
| C | 2.387358  | -1.486870 | -2.352069 |
| C | 4.560742  | -0.457368 | -1.561302 |
| C | 2.890905  | -1.348137 | 1.377012  |
| C | 4.309603  | -0.995684 | 1.857638  |
| C | 1.905496  | -1.242668 | 2.561670  |
| C | 2.852997  | -2.784601 | 0.828693  |
| H | -2.995416 | 2.770797  | -0.487638 |
| H | -2.225354 | 2.057194  | -1.901566 |
| H | 2.698509  | 1.510010  | 1.809050  |
| H | 3.608295  | 1.930343  | 0.360900  |
| H | -2.686276 | -1.417242 | -3.294745 |
| H | -1.853172 | 0.107627  | -2.960372 |
| H | -1.286825 | -1.395381 | -2.206815 |
| H | -5.162358 | 0.217371  | -1.029555 |
| H | -4.231161 | 1.018176  | -2.308787 |
| H | -4.910704 | -0.589329 | -2.582151 |
| H | -4.236189 | -1.925154 | 0.078677  |
| H | -3.875867 | -2.659427 | -1.487076 |
| H | -2.587948 | -2.481499 | -0.286174 |
| H | -4.887563 | 0.985620  | 2.573826  |
| H | -4.768669 | 1.688124  | 0.955546  |
| H | -5.044330 | -0.056620 | 1.156716  |
| H | -3.119749 | -1.600672 | 1.964275  |
| H | -1.583984 | -0.866480 | 2.474750  |
| H | -3.054183 | -0.613212 | 3.428978  |
| H | -2.536934 | 2.726087  | 1.860300  |
| H | -1.228009 | 1.652932  | 2.379986  |



|   |           |           |           |
|---|-----------|-----------|-----------|
| H | -2.695868 | 1.811430  | 3.366787  |
| H | 3.064962  | 0.889276  | -3.433832 |
| H | 1.607235  | 1.163154  | -2.457283 |
| H | 3.149182  | 1.886889  | -1.974611 |
| H | 2.593102  | -2.443116 | -1.862603 |
| H | 2.782377  | -1.546945 | -3.374449 |
| H | 1.299088  | -1.362465 | -2.424757 |
| H | 4.969155  | -0.437785 | -2.580303 |
| H | 5.040724  | 0.353825  | -1.000595 |
| H | 4.854521  | -1.410516 | -1.110596 |
| H | 4.606631  | -1.701896 | 2.644422  |
| H | 5.050914  | -1.063551 | 1.057137  |
| H | 4.361295  | 0.010762  | 2.288109  |
| H | 0.896155  | -1.568191 | 2.277771  |
| H | 2.247737  | -1.891720 | 3.378126  |
| H | 1.831151  | -0.223526 | 2.959646  |
| H | 3.071154  | -3.487959 | 1.642674  |
| H | 1.865720  | -3.044961 | 0.424855  |
| H | 3.599509  | -2.948893 | 0.045406  |
| C | 1.911200  | 6.682405  | 0.161673  |
| H | 1.732736  | 7.753055  | 0.044017  |
| H | 2.198513  | 6.469941  | 1.200535  |
| H | 2.717090  | 6.368139  | -0.515705 |

78

2,Ni-(H)-formate el energy= -1426.70076022

|    |           |           |           |
|----|-----------|-----------|-----------|
| Ni | -0.228378 | -0.403922 | 0.002110  |
| H  | -0.916788 | -1.860064 | 0.023764  |
| C  | 0.594931  | 1.340015  | -0.025755 |
| C  | 1.968013  | 1.510905  | 0.242275  |
| C  | 2.796545  | 0.296507  | 0.596584  |
| C  | 2.574409  | 2.776147  | 0.218960  |
| H  | 3.636153  | 2.863058  | 0.431022  |
| C  | 1.804765  | 3.909087  | -0.062209 |
| C  | 0.435613  | 3.767646  | -0.325248 |
| H  | -0.139712 | 4.664090  | -0.547164 |
| C  | -0.156352 | 2.506148  | -0.315095 |
| C  | -1.622801 | 2.357393  | -0.652418 |
| P  | 1.827888  | -1.215182 | 0.084123  |
| P  | -2.164364 | 0.662827  | -0.086757 |
| C  | 2.274711  | -2.517668 | 1.394183  |
| C  | 1.381918  | -2.170177 | 2.605707  |
| C  | 3.758764  | -2.453334 | 1.802476  |
| C  | 1.941389  | -3.945235 | 0.930312  |
| C  | 2.437027  | -1.660920 | -1.654970 |

|   |           |           |           |
|---|-----------|-----------|-----------|
| C | 3.894287  | -2.145623 | -1.684819 |
| C | 1.499805  | -2.732848 | -2.245061 |
| C | 2.304408  | -0.381564 | -2.506822 |
| C | -2.876660 | 0.894238  | 1.654798  |
| C | -1.796841 | 1.631590  | 2.473717  |
| C | -3.097364 | -0.494547 | 2.285563  |
| C | -4.178767 | 1.708953  | 1.677751  |
| C | -3.465581 | 0.140278  | -1.369411 |
| C | -4.366705 | 1.313345  | -1.799599 |
| C | -2.641529 | -0.359375 | -2.576373 |
| C | -4.347344 | -1.013336 | -0.863900 |
| H | 3.802610  | 0.320431  | 0.157848  |
| H | 2.931761  | 0.240228  | 1.684103  |
| H | -1.759144 | 2.390905  | -1.740639 |
| H | -2.242751 | 3.160764  | -0.234784 |
| H | 1.655026  | -2.815339 | 3.452581  |
| H | 1.508293  | -1.128289 | 2.929102  |
| H | 0.326837  | -2.344652 | 2.371377  |
| H | 4.433018  | -2.656192 | 0.964608  |
| H | 4.033578  | -1.485396 | 2.235019  |
| H | 3.946025  | -3.216850 | 2.570157  |
| H | 2.593125  | -4.277228 | 0.115237  |
| H | 2.097105  | -4.631389 | 1.774344  |
| H | 0.897692  | -4.046628 | 0.624920  |
| H | 4.207266  | -2.291682 | -2.728209 |
| H | 4.581356  | -1.418224 | -1.234582 |
| H | 4.019862  | -3.102882 | -1.168779 |
| H | 1.588752  | -3.695118 | -1.733742 |
| H | 0.448558  | -2.431431 | -2.192271 |
| H | 1.757945  | -2.892674 | -3.301292 |
| H | 2.948055  | 0.430524  | -2.151199 |
| H | 1.274602  | -0.009503 | -2.511337 |
| H | 2.593241  | -0.615281 | -3.540830 |
| H | -2.147139 | 1.730523  | 3.510393  |
| H | -0.852136 | 1.077871  | 2.479741  |
| H | -1.589499 | 2.636433  | 2.089708  |
| H | -3.900745 | -1.053671 | 1.798330  |
| H | -3.373299 | -0.368722 | 3.341910  |
| H | -2.195056 | -1.113038 | 2.239682  |
| H | -4.478560 | 1.884629  | 2.720433  |
| H | -4.061127 | 2.689830  | 1.200383  |
| H | -5.002579 | 1.182545  | 1.185099  |
| H | -3.801154 | 2.130918  | -2.259065 |
| H | -5.081905 | 0.950765  | -2.550844 |
| H | -4.944457 | 1.724828  | -0.966082 |

|   |           |           |           |
|---|-----------|-----------|-----------|
| H | -2.100730 | -1.276723 | -2.322248 |
| H | -3.321574 | -0.583622 | -3.410186 |
| H | -1.923012 | 0.392808  | -2.928488 |
| H | -4.986466 | -1.352171 | -1.691036 |
| H | -3.756557 | -1.874270 | -0.543434 |
| H | -5.007471 | -0.700726 | -0.048056 |
| C | -1.467383 | -3.039789 | 0.045126  |
| O | -1.438877 | -3.467963 | 1.182338  |
| O | -1.829227 | -3.325558 | -1.079465 |
| O | 2.288491  | 5.184905  | -0.105381 |
| C | 3.668482  | 5.376947  | 0.143362  |
| H | 3.947321  | 5.043495  | 1.153895  |
| H | 4.289257  | 4.845552  | -0.593172 |
| H | 3.843864  | 6.452459  | 0.055942  |

78

2, Ni-H+CO2 el energy= -1426.70549755

|    |           |           |           |
|----|-----------|-----------|-----------|
| Ni | -0.226154 | -0.377594 | -0.005831 |
| H  | -0.892300 | -1.777319 | 0.047892  |
| C  | 0.608415  | 1.394405  | -0.055258 |
| C  | 1.983741  | 1.574053  | 0.205921  |
| C  | 2.806288  | 0.355555  | 0.579142  |
| C  | 2.592954  | 2.838177  | 0.165682  |
| H  | 3.655180  | 2.931257  | 0.374733  |
| C  | 1.820782  | 3.966617  | -0.128329 |
| C  | 0.448686  | 3.825491  | -0.378156 |
| H  | -0.125254 | 4.722660  | -0.602873 |
| C  | -0.142451 | 2.563426  | -0.345514 |
| C  | -1.622854 | 2.405492  | -0.637228 |
| P  | 1.804772  | -1.154082 | 0.093919  |
| P  | -2.116135 | 0.698223  | -0.041012 |
| C  | 2.188143  | -2.423781 | 1.453200  |
| C  | 1.339024  | -1.961444 | 2.656817  |
| C  | 3.670618  | -2.472611 | 1.862702  |
| C  | 1.713521  | -3.824089 | 1.035682  |
| C  | 2.485473  | -1.660029 | -1.606224 |
| C  | 3.918132  | -2.210935 | -1.564877 |
| C  | 1.532765  | -2.694176 | -2.233296 |
| C  | 2.448506  | -0.389209 | -2.480970 |
| C  | -2.798140 | 0.964445  | 1.713954  |
| C  | -1.726182 | 1.768790  | 2.479254  |
| C  | -2.945706 | -0.406146 | 2.401584  |
| C  | -4.130891 | 1.726143  | 1.755646  |
| C  | -3.445785 | 0.134812  | -1.270875 |
| C  | -4.468496 | 1.225645  | -1.632854 |

|   |           |           |           |
|---|-----------|-----------|-----------|
| C | -2.654310 | -0.259222 | -2.536440 |
| C | -4.170059 | -1.109505 | -0.732265 |
| H | 3.810374  | 0.359019  | 0.133738  |
| H | 2.952119  | 0.316912  | 1.666836  |
| H | -1.804372 | 2.438787  | -1.719552 |
| H | -2.233984 | 3.203918  | -0.195889 |
| H | 1.497539  | -2.645734 | 3.502342  |
| H | 1.608095  | -0.951286 | 2.990675  |
| H | 0.274143  | -1.961334 | 2.399986  |
| H | 4.317625  | -2.815735 | 1.050318  |
| H | 4.038878  | -1.497526 | 2.200864  |
| H | 3.790354  | -3.175243 | 2.699732  |
| H | 2.336549  | -4.248638 | 0.240423  |
| H | 1.777673  | -4.501734 | 1.898810  |
| H | 0.671967  | -3.808393 | 0.700112  |
| H | 4.282339  | -2.360749 | -2.591356 |
| H | 4.611653  | -1.522164 | -1.066804 |
| H | 3.970063  | -3.179086 | -1.055543 |
| H | 1.520387  | -3.639351 | -1.681697 |
| H | 0.508471  | -2.311756 | -2.267385 |
| H | 1.856613  | -2.912632 | -3.260884 |
| H | 3.133634  | 0.386833  | -2.123297 |
| H | 1.444055  | 0.045658  | -2.509842 |
| H | 2.744226  | -0.655050 | -3.505591 |
| H | -2.043333 | 1.873960  | 3.526342  |
| H | -0.755940 | 1.262158  | 2.457337  |
| H | -1.582032 | 2.773609  | 2.068142  |
| H | -3.732816 | -1.017788 | 1.950961  |
| H | -3.202819 | -0.256277 | 3.459835  |
| H | -2.010217 | -0.972472 | 2.345195  |
| H | -4.392041 | 1.949001  | 2.800092  |
| H | -4.078183 | 2.681453  | 1.218930  |
| H | -4.952256 | 1.138217  | 1.332611  |
| H | -3.987020 | 2.117470  | -2.049806 |
| H | -5.155271 | 0.837022  | -2.398398 |
| H | -5.072290 | 1.536103  | -0.775543 |
| H | -1.945465 | -1.063664 | -2.321054 |
| H | -3.352358 | -0.609924 | -3.309676 |
| H | -2.096003 | 0.588665  | -2.952737 |
| H | -4.745536 | -1.580004 | -1.541529 |
| H | -3.457694 | -1.845873 | -0.345764 |
| H | -4.873157 | -0.856662 | 0.069418  |
| C | -1.771327 | -4.000177 | -1.027913 |
| O | -1.738666 | -4.469894 | 0.038859  |
| O | -1.826895 | -3.585213 | -2.117045 |

|   |          |          |           |
|---|----------|----------|-----------|
| O | 2.306769 | 5.244880 | -0.192446 |
| C | 3.686348 | 5.436511 | 0.047945  |
| H | 3.969894 | 5.117317 | 1.062225  |
| H | 4.304676 | 4.892292 | -0.681840 |
| H | 3.865667 | 6.510303 | -0.056003 |

78

2,Ni-(O)-formate-isomer el energy= -1426.72672840

|    |           |           |           |
|----|-----------|-----------|-----------|
| Ni | 0.206885  | -0.472679 | 0.028422  |
| P  | -1.968565 | -1.003990 | 0.111821  |
| P  | 2.248876  | 0.409836  | -0.038247 |
| O  | 0.796622  | -2.292866 | 0.373483  |
| O  | 0.706049  | -4.484447 | -0.096663 |
| C  | -2.533478 | -2.225032 | 1.455573  |
| C  | -1.577693 | -1.962786 | 2.639761  |
| C  | -2.375928 | -3.690919 | 1.017220  |
| C  | -3.988135 | -1.975983 | 1.897196  |
| C  | -2.706714 | -1.380549 | -1.594979 |
| C  | -1.885103 | -2.513538 | -2.237399 |
| C  | -4.195964 | -1.754534 | -1.546912 |
| C  | -2.529458 | -0.112669 | -2.454942 |
| C  | -2.713640 | 0.625210  | 0.619264  |
| C  | -1.750777 | 1.710227  | 0.191880  |
| C  | -2.210296 | 3.033562  | 0.116476  |
| C  | -1.322216 | 4.060884  | -0.213418 |
| C  | 0.022025  | 3.754112  | -0.457199 |
| C  | 0.468582  | 2.435319  | -0.392276 |
| C  | -0.407678 | 1.363212  | -0.076331 |
| C  | 1.926545  | 2.133089  | -0.663828 |
| C  | 3.511289  | -0.307074 | -1.256855 |
| C  | 2.698422  | -0.620980 | -2.531298 |
| C  | 4.639115  | 0.677251  | -1.615039 |
| C  | 4.110717  | -1.611312 | -0.703721 |
| C  | 2.931043  | 0.601505  | 1.722217  |
| C  | 1.892274  | 1.449524  | 2.487105  |
| C  | 3.003304  | -0.788380 | 2.386559  |
| C  | 4.300415  | 1.293864  | 1.784442  |
| C  | 0.887778  | -3.317497 | -0.412937 |
| H  | -0.551425 | -2.216580 | 2.358735  |
| H  | -1.877669 | -2.589306 | 3.491395  |
| H  | -1.605215 | -0.916427 | 2.973262  |
| H  | -3.052452 | -3.951040 | 0.195294  |
| H  | -2.642207 | -4.335145 | 1.867477  |
| H  | -1.350329 | -3.940767 | 0.730208  |
| H  | -4.232480 | -2.674201 | 2.709823  |

|   |           |           |           |
|---|-----------|-----------|-----------|
| H | -4.706684 | -2.147494 | 1.090104  |
| H | -4.143491 | -0.962422 | 2.283096  |
| H | -0.843710 | -2.203728 | -2.375927 |
| H | -2.301326 | -2.749567 | -3.226820 |
| H | -1.881919 | -3.432247 | -1.644459 |
| H | -4.797284 | -0.984416 | -1.047973 |
| H | -4.365733 | -2.707987 | -1.037526 |
| H | -4.577310 | -1.856560 | -2.572828 |
| H | -2.847602 | -0.336146 | -3.482808 |
| H | -1.484778 | 0.214532  | -2.479860 |
| H | -3.131433 | 0.727648  | -2.092334 |
| H | -3.729043 | 0.772104  | 0.229083  |
| H | -2.797615 | 0.613001  | 1.713604  |
| H | -3.253878 | 3.246409  | 0.329860  |
| H | 0.699686  | 4.570052  | -0.700194 |
| H | 2.600803  | 2.877605  | -0.221764 |
| H | 2.124541  | 2.136524  | -1.743230 |
| H | 2.231888  | 0.276220  | -2.956736 |
| H | 1.907033  | -1.349657 | -2.331019 |
| H | 3.366764  | -1.041603 | -3.295186 |
| H | 4.256231  | 1.604781  | -2.055747 |
| H | 5.298282  | 0.209180  | -2.359822 |
| H | 5.254200  | 0.940505  | -0.750219 |
| H | 4.638548  | -2.140016 | -1.509339 |
| H | 3.339423  | -2.276106 | -0.305702 |
| H | 4.839055  | -1.413355 | 0.090164  |
| H | 1.777650  | 2.455759  | 2.069428  |
| H | 2.221085  | 1.550713  | 3.530501  |
| H | 0.905720  | 0.974236  | 2.480174  |
| H | 3.163016  | -0.660253 | 3.466207  |
| H | 3.832528  | -1.387489 | 1.999853  |
| H | 2.083533  | -1.361362 | 2.231810  |
| H | 4.567096  | 1.477092  | 2.834881  |
| H | 4.301524  | 2.263601  | 1.271144  |
| H | 5.091446  | 0.672778  | 1.351665  |
| H | 1.165471  | -3.078522 | -1.468524 |
| O | -1.660645 | 5.379920  | -0.313427 |
| C | -3.009341 | 5.734637  | -0.072435 |
| H | -3.689576 | 5.243247  | -0.783826 |
| H | -3.317668 | 5.479145  | 0.952182  |
| H | -3.065200 | 6.818077  | -0.207538 |

78

1,Ni-(O)-formate el energy= -1426.73676049

|    |          |           |          |
|----|----------|-----------|----------|
| Ni | 0.173401 | -0.510271 | 0.118930 |
|----|----------|-----------|----------|

|   |           |           |           |
|---|-----------|-----------|-----------|
| P | -2.005901 | -1.012247 | 0.118618  |
| P | 2.247472  | 0.348833  | -0.017336 |
| O | 0.726844  | -2.300906 | 0.672892  |
| O | 1.154135  | -3.262337 | -1.331954 |
| C | -2.641527 | -2.210323 | 1.449361  |
| C | -1.769126 | -1.920618 | 2.690482  |
| C | -2.427256 | -3.672775 | 1.027426  |
| C | -4.123520 | -1.987205 | 1.801591  |
| C | -2.675483 | -1.393946 | -1.617831 |
| C | -1.938912 | -2.615833 | -2.196489 |
| C | -4.193618 | -1.629580 | -1.643047 |
| C | -2.331508 | -0.168610 | -2.490481 |
| C | -2.761598 | 0.623102  | 0.583675  |
| C | -1.768890 | 1.695583  | 0.196017  |
| C | -2.208973 | 3.026432  | 0.127170  |
| C | -1.302237 | 4.043456  | -0.180351 |
| C | 0.038334  | 3.716589  | -0.416068 |
| C | 0.463774  | 2.390431  | -0.358778 |
| C | -0.427466 | 1.328985  | -0.053170 |
| C | 1.911623  | 2.069892  | -0.644665 |
| C | 3.511992  | -0.325441 | -1.267422 |
| C | 2.683810  | -0.670804 | -2.524195 |
| C | 4.590759  | 0.711145  | -1.635757 |
| C | 4.195441  | -1.600741 | -0.748549 |
| C | 2.965005  | 0.571807  | 1.727649  |
| C | 1.923576  | 1.401221  | 2.508588  |
| C | 3.085066  | -0.809066 | 2.402319  |
| C | 4.319560  | 1.294791  | 1.758375  |
| C | 1.081181  | -3.263129 | -0.104204 |
| H | -0.720908 | -2.155470 | 2.485209  |
| H | -2.116629 | -2.541204 | 3.528693  |
| H | -1.836149 | -0.871713 | 3.007808  |
| H | -3.102654 | -3.969687 | 0.218177  |
| H | -2.634513 | -4.327361 | 1.885743  |
| H | -1.396924 | -3.851429 | 0.709619  |
| H | -4.406155 | -2.682228 | 2.604960  |
| H | -4.789297 | -2.174417 | 0.954292  |
| H | -4.315454 | -0.972554 | 2.167702  |
| H | -0.851198 | -2.513943 | -2.130373 |
| H | -2.214161 | -2.726943 | -3.254995 |
| H | -2.213478 | -3.545116 | -1.688615 |
| H | -4.754674 | -0.803532 | -1.188580 |
| H | -4.471184 | -2.557653 | -1.132414 |
| H | -4.527056 | -1.718923 | -2.686555 |
| H | -2.651848 | -0.372863 | -3.521441 |

|   |           |           |           |
|---|-----------|-----------|-----------|
| H | -1.254433 | 0.027332  | -2.496262 |
| H | -2.833633 | 0.745240  | -2.154816 |
| H | -3.752126 | 0.776565  | 0.136287  |
| H | -2.907219 | 0.619058  | 1.671668  |
| H | -3.252725 | 3.251460  | 0.327138  |
| H | 0.730818  | 4.522673  | -0.650089 |
| H | 2.600308  | 2.813311  | -0.223978 |
| H | 2.086819  | 2.061199  | -1.727440 |
| H | 2.144311  | 0.202441  | -2.914014 |
| H | 1.965439  | -1.468909 | -2.313621 |
| H | 3.364523  | -1.015459 | -3.315633 |
| H | 4.164970  | 1.623187  | -2.067707 |
| H | 5.253210  | 0.271739  | -2.394717 |
| H | 5.212169  | 0.996259  | -0.782124 |
| H | 4.786017  | -2.043158 | -1.562625 |
| H | 3.471170  | -2.351621 | -0.425823 |
| H | 4.882710  | -1.387477 | 0.077586  |
| H | 1.782643  | 2.403659  | 2.089918  |
| H | 2.265980  | 1.511845  | 3.546914  |
| H | 0.945872  | 0.907244  | 2.518083  |
| H | 3.304320  | -0.668140 | 3.470190  |
| H | 3.896238  | -1.406383 | 1.975215  |
| H | 2.160585  | -1.386271 | 2.303551  |
| H | 4.600557  | 1.494955  | 2.802148  |
| H | 4.290682  | 2.258684  | 1.235419  |
| H | 5.116180  | 0.686857  | 1.317289  |
| H | 1.344182  | -4.186619 | 0.460568  |
| O | -1.618860 | 5.369221  | -0.269265 |
| C | -2.964572 | 5.741313  | -0.040393 |
| H | -3.643633 | 5.268841  | -0.765705 |
| H | -3.289518 | 5.478208  | 0.977247  |
| H | -3.002844 | 6.827076  | -0.162951 |

78

2, TS-2-3      el energy= -1426.69933708

|    |           |           |           |
|----|-----------|-----------|-----------|
| Ni | 0.008061  | 0.106217  | 0.007448  |
| H  | -0.001400 | 1.675510  | 0.011763  |
| C  | 0.018544  | -1.840671 | 0.003088  |
| C  | 1.187136  | -2.574046 | -0.288742 |
| C  | 2.446195  | -1.810649 | -0.640996 |
| C  | 1.204432  | -3.977459 | -0.290207 |
| H  | 2.127142  | -4.502254 | -0.521323 |
| C  | 0.030655  | -4.683481 | -0.008497 |
| C  | -1.148736 | -3.982562 | 0.278001  |
| H  | -2.045886 | -4.557604 | 0.498803  |



|   |           |           |           |
|---|-----------|-----------|-----------|
| C | -1.151138 | -2.588852 | 0.289822  |
| C | -2.414367 | -1.834191 | 0.644789  |
| P | 2.196594  | -0.041020 | -0.087111 |
| P | -2.179509 | -0.062443 | 0.091977  |
| C | 3.147842  | 0.982052  | -1.376314 |
| C | 2.189242  | 1.068744  | -2.583615 |
| C | 4.469047  | 0.320209  | -1.810121 |
| C | 3.437928  | 2.405672  | -0.875036 |
| C | 2.962394  | 0.061727  | 1.646481  |
| C | 4.490331  | -0.095657 | 1.656805  |
| C | 2.552970  | 1.403589  | 2.283871  |
| C | 2.327889  | -1.075733 | 2.473694  |
| C | -2.935065 | 0.034414  | -1.646588 |
| C | -2.285683 | -1.097518 | -2.469761 |
| C | -2.533882 | 1.379706  | -2.281805 |
| C | -4.461362 | -0.136506 | -1.665023 |
| C | -3.148831 | 0.951117  | 1.374706  |
| C | -4.464931 | 0.274407  | 1.801347  |
| C | -2.199208 | 1.050058  | 2.588266  |
| C | -3.451721 | 2.370759  | 0.869679  |
| H | 3.355525  | -2.260482 | -0.220659 |
| H | 2.582780  | -1.793206 | -1.730032 |
| H | -2.544912 | -1.816621 | 1.734433  |
| H | -3.321314 | -2.292477 | 0.229604  |
| H | 2.692942  | 1.585189  | -3.412901 |
| H | 1.888145  | 0.076353  | -2.943941 |
| H | 1.287496  | 1.632235  | -2.324966 |
| H | 5.172056  | 0.206205  | -0.979321 |
| H | 4.313061  | -0.665365 | -2.261453 |
| H | 4.951930  | 0.952603  | -2.568302 |
| H | 4.184678  | 2.416682  | -0.074134 |
| H | 3.838908  | 3.000809  | -1.707189 |
| H | 2.534375  | 2.908898  | -0.523851 |
| H | 4.846058  | -0.126938 | 2.696414  |
| H | 4.812447  | -1.025639 | 1.171823  |
| H | 4.995409  | 0.741666  | 1.164422  |
| H | 3.012899  | 2.262437  | 1.787115  |
| H | 1.468051  | 1.546348  | 2.251002  |
| H | 2.872620  | 1.416783  | 3.335405  |
| H | 2.583616  | -2.068837 | 2.088629  |
| H | 1.235883  | -0.998903 | 2.487284  |
| H | 2.695134  | -1.007678 | 3.507193  |
| H | -2.645001 | -1.031073 | -3.506149 |
| H | -1.194161 | -1.012021 | -2.474242 |
| H | -2.537256 | -2.092874 | -2.087924 |

|   |           |           |           |
|---|-----------|-----------|-----------|
| H | -3.001692 | 2.235139  | -1.786463 |
| H | -2.850069 | 1.390689  | -3.334417 |
| H | -1.450174 | 1.530369  | -2.245432 |
| H | -4.811495 | -0.169713 | -2.706459 |
| H | -4.777560 | -1.069791 | -1.182749 |
| H | -4.975807 | 0.695805  | -1.173943 |
| H | -4.300224 | -0.709263 | 2.253798  |
| H | -4.958960 | 0.901554  | 2.556699  |
| H | -5.162175 | 0.152126  | 0.966880  |
| H | -1.301264 | 1.622211  | 2.335301  |
| H | -2.714072 | 1.562888  | 3.412930  |
| H | -1.891022 | 0.061474  | 2.952886  |
| H | -3.863755 | 2.962861  | 1.698565  |
| H | -2.551887 | 2.883312  | 0.522237  |
| H | -4.193947 | 2.372335  | 0.064469  |
| C | -0.008383 | 3.299181  | 0.012772  |
| O | 0.119339  | 3.570264  | -1.139128 |
| O | -0.138347 | 3.567246  | 1.165080  |
| O | -0.069291 | -6.046655 | 0.012746  |
| C | 1.097316  | -6.797312 | -0.263070 |
| H | 1.479802  | -6.594335 | -1.274532 |
| H | 1.893598  | -6.590847 | 0.467664  |
| H | 0.804407  | -7.848322 | -0.191477 |

78

2,TS-3-4i el energy= -1426.69567297

|    |           |           |           |
|----|-----------|-----------|-----------|
| Ni | 0.008185  | -0.020929 | -0.028426 |
| P  | -2.236955 | 0.195535  | 0.123997  |
| P  | 2.237985  | 0.115465  | -0.090336 |
| O  | -0.086624 | -2.167669 | -1.321813 |
| O  | -0.757738 | -3.414868 | 0.469100  |
| C  | -3.227359 | -0.814458 | 1.404013  |
| C  | -2.234300 | -1.116837 | 2.547178  |
| C  | -3.744204 | -2.144308 | 0.829708  |
| C  | -4.419747 | -0.010853 | 1.960803  |
| C  | -3.085833 | 0.262702  | -1.575922 |
| C  | -2.957691 | -1.099959 | -2.284382 |
| C  | -4.564569 | 0.672867  | -1.484676 |
| C  | -2.314620 | 1.309983  | -2.405844 |
| C  | -2.319972 | 1.935156  | 0.782644  |
| C  | -1.079866 | 2.661885  | 0.327794  |
| C  | -1.062861 | 4.054900  | 0.307426  |
| C  | 0.102141  | 4.746529  | -0.048089 |
| C  | 1.255141  | 4.025277  | -0.367623 |
| C  | 1.229325  | 2.622164  | -0.355148 |

|   |           |           |           |
|---|-----------|-----------|-----------|
| C | 0.061358  | 1.902400  | -0.030462 |
| C | 2.492043  | 1.861407  | -0.681755 |
| C | 3.232556  | -0.926368 | -1.332090 |
| C | 2.433925  | -0.873517 | -2.653254 |
| C | 4.644302  | -0.361832 | -1.580118 |
| C | 3.326034  | -2.388368 | -0.866346 |
| C | 2.943304  | 0.066315  | 1.678088  |
| C | 2.334220  | 1.261756  | 2.439451  |
| C | 2.475172  | -1.227540 | 2.371207  |
| C | 4.475817  | 0.162015  | 1.732036  |
| C | -0.244769 | -2.470130 | -0.118658 |
| H | -1.487744 | -1.849833 | 2.228272  |
| H | -2.784994 | -1.541533 | 3.398181  |
| H | -1.719962 | -0.213638 | 2.902515  |
| H | -4.545516 | -1.987519 | 0.099861  |
| H | -4.164821 | -2.736207 | 1.654799  |
| H | -2.946210 | -2.739385 | 0.377922  |
| H | -4.968638 | -0.647265 | 2.668436  |
| H | -5.122434 | 0.295429  | 1.179790  |
| H | -4.105123 | 0.884263  | 2.507573  |
| H | -1.925261 | -1.461387 | -2.289296 |
| H | -3.297965 | -0.985762 | -3.323450 |
| H | -3.578061 | -1.870003 | -1.818372 |
| H | -4.705328 | 1.630178  | -0.967975 |
| H | -5.170315 | -0.085818 | -0.978848 |
| H | -4.966280 | 0.787622  | -2.501180 |
| H | -2.750436 | 1.345696  | -3.413788 |
| H | -1.256542 | 1.043237  | -2.498400 |
| H | -2.369906 | 2.316086  | -1.976915 |
| H | -3.245502 | 2.453985  | 0.507028  |
| H | -2.315893 | 1.855872  | 1.877315  |
| H | -1.943592 | 4.633589  | 0.577422  |
| O | 0.013530  | 6.107942  | -0.038033 |
| H | 2.178234  | 4.535283  | -0.627200 |
| H | 3.387240  | 2.323170  | -0.245721 |
| H | 2.654909  | 1.821634  | -1.765777 |
| H | 2.342711  | 0.148818  | -3.041546 |
| H | 1.435892  | -1.297392 | -2.521153 |
| H | 2.971942  | -1.461776 | -3.409747 |
| H | 4.623857  | 0.687916  | -1.894904 |
| H | 5.108826  | -0.935610 | -2.393995 |
| H | 5.296289  | -0.444782 | -0.707453 |
| H | 3.811823  | -2.982047 | -1.652957 |
| H | 2.334888  | -2.816694 | -0.695857 |
| H | 3.928691  | -2.495214 | 0.042526  |

|   |          |           |           |
|---|----------|-----------|-----------|
| H | 2.665238 | 2.227109  | 2.041376  |
| H | 2.649191 | 1.204808  | 3.490540  |
| H | 1.240426 | 1.245825  | 2.404532  |
| H | 2.876352 | -1.252071 | 3.393868  |
| H | 2.814728 | -2.131749 | 1.857338  |
| H | 1.382925 | -1.270349 | 2.434576  |
| H | 4.792102 | 0.277414  | 2.778124  |
| H | 4.859462 | 1.025502  | 1.175132  |
| H | 4.956410 | -0.741715 | 1.344169  |
| H | 0.213145 | -1.668198 | 0.642132  |
| C | 1.170155 | 6.847135  | -0.384223 |
| H | 0.884912 | 7.900506  | -0.320905 |
| H | 1.998083 | 6.651610  | 0.313320  |
| H | 1.502601 | 6.620182  | -1.407874 |

78

2, TS-4i-4      el energy= -1426.72337444

|    |           |           |           |
|----|-----------|-----------|-----------|
| Ni | -1.063388 | 1.172688  | -0.014633 |
| P  | -3.291173 | 1.299197  | 0.093614  |
| P  | 1.171502  | 1.435865  | -0.131903 |
| O  | -0.999931 | -0.742743 | 0.367448  |
| O  | -0.037551 | -2.451638 | -0.752349 |
| C  | -4.166732 | 0.302653  | 1.453402  |
| C  | -3.176286 | 0.313931  | 2.638457  |
| C  | -4.394891 | -1.154832 | 1.025288  |
| C  | -5.503434 | 0.929792  | 1.889152  |
| C  | -4.118109 | 1.134238  | -1.607977 |
| C  | -3.662844 | -0.189099 | -2.250088 |
| C  | -5.651846 | 1.202397  | -1.552508 |
| C  | -3.588662 | 2.292898  | -2.478017 |
| C  | -3.544685 | 3.072969  | 0.590095  |
| C  | -2.314796 | 3.828040  | 0.138878  |
| C  | -2.371266 | 5.228143  | 0.063625  |
| C  | -1.232692 | 5.950728  | -0.300806 |
| C  | -0.046083 | 5.262833  | -0.582785 |
| C  | -0.001498 | 3.871441  | -0.517213 |
| C  | -1.139880 | 3.103042  | -0.159726 |
| C  | 1.288855  | 3.156221  | -0.836598 |
| C  | 2.279332  | 0.411284  | -1.290838 |
| C  | 1.396597  | 0.101228  | -2.518724 |
| C  | 3.522750  | 1.202594  | -1.743398 |
| C  | 2.726028  | -0.911592 | -0.648038 |
| C  | 1.866807  | 1.538450  | 1.632328  |
| C  | 1.066867  | 2.636921  | 2.362767  |
| C  | 1.600748  | 0.195740  | 2.342909  |

|   |           |           |           |
|---|-----------|-----------|-----------|
| C | 3.361875  | 1.888136  | 1.683946  |
| C | -1.003543 | -1.800096 | -0.376782 |
| H | -2.248964 | -0.197882 | 2.364437  |
| H | -3.629806 | -0.205259 | 3.494495  |
| H | -2.929805 | 1.333078  | 2.963854  |
| H | -5.136770 | -1.242023 | 0.223978  |
| H | -4.772777 | -1.725309 | 1.885266  |
| H | -3.462223 | -1.620172 | 0.698967  |
| H | -5.922588 | 0.334038  | 2.712202  |
| H | -6.242886 | 0.943617  | 1.083150  |
| H | -5.382792 | 1.953939  | 2.258945  |
| H | -2.570915 | -0.233423 | -2.324914 |
| H | -4.077200 | -0.261429 | -3.265279 |
| H | -3.997152 | -1.067090 | -1.690080 |
| H | -6.005923 | 2.113768  | -1.055039 |
| H | -6.085282 | 0.338754  | -1.037992 |
| H | -6.052129 | 1.209669  | -2.576158 |
| H | -3.975196 | 2.170302  | -3.499269 |
| H | -2.494821 | 2.298152  | -2.519906 |
| H | -3.910697 | 3.273822  | -2.112516 |
| H | -4.478473 | 3.498520  | 0.200155  |
| H | -3.622182 | 3.097826  | 1.684798  |
| H | -3.301347 | 5.735630  | 0.302998  |
| H | 0.832385  | 5.843466  | -0.856620 |
| H | 2.173748  | 3.703555  | -0.488571 |
| H | 1.396137  | 3.045918  | -1.923328 |
| H | 0.963511  | 1.009303  | -2.959642 |
| H | 0.589781  | -0.586902 | -2.253202 |
| H | 2.010820  | -0.381768 | -3.291567 |
| H | 3.267643  | 2.099322  | -2.318136 |
| H | 4.125317  | 0.557621  | -2.397850 |
| H | 4.157462  | 1.504138  | -0.904561 |
| H | 3.239076  | -1.511420 | -1.413466 |
| H | 1.872449  | -1.497117 | -0.295517 |
| H | 3.439838  | -0.747570 | 0.166765  |
| H | 1.198421  | 3.626198  | 1.911318  |
| H | 1.412898  | 2.689477  | 3.404480  |
| H | -0.005669 | 2.415643  | 2.365931  |
| H | 1.810667  | 0.311114  | 3.415720  |
| H | 2.235888  | -0.607864 | 1.961905  |
| H | 0.561660  | -0.124313 | 2.216644  |
| H | 3.668747  | 2.012496  | 2.732195  |
| H | 3.584857  | 2.828128  | 1.163636  |
| H | 3.984718  | 1.098666  | 1.252359  |
| H | -2.022153 | -2.155614 | -0.668787 |

|   |           |          |           |
|---|-----------|----------|-----------|
| O | -1.173153 | 7.310896 | -0.403309 |
| C | -2.351306 | 8.044796 | -0.128031 |
| H | -3.166512 | 7.772635 | -0.814863 |
| H | -2.690066 | 7.892190 | 0.907460  |
| H | -2.092311 | 9.097049 | -0.272583 |

71

3,Ni-H    el energy= -1134.38098892

|    |           |           |           |
|----|-----------|-----------|-----------|
| Ni | 0.000000  | 0.000000  | 0.230705  |
| H  | 0.000000  | 0.000000  | 1.783739  |
| C  | 0.000000  | 0.000000  | -1.724964 |
| C  | 1.197442  | 0.166693  | -2.461319 |
| C  | 2.488970  | 0.378796  | -1.691089 |
| C  | 1.206441  | 0.162215  | -3.862215 |
| H  | 2.134541  | 0.291146  | -4.413580 |
| C  | 0.000000  | 0.000000  | -4.544967 |
| I  | 0.000000  | 0.000000  | -6.670697 |
| C  | -1.206441 | -0.162215 | -3.862215 |
| H  | -2.134541 | -0.291146 | -4.413580 |
| C  | -1.197442 | -0.166693 | -2.461319 |
| C  | -2.488970 | -0.378796 | -1.691089 |
| P  | 2.162044  | -0.145834 | 0.081623  |
| P  | -2.162044 | 0.145834  | 0.081623  |
| C  | 3.186009  | 1.054656  | 1.134139  |
| C  | 2.379314  | 2.370921  | 1.108047  |
| C  | 4.602136  | 1.312975  | 0.592166  |
| C  | 3.253913  | 0.555360  | 2.586252  |
| C  | 2.775023  | -1.940944 | 0.185585  |
| C  | 4.301301  | -2.083142 | 0.095825  |
| C  | 2.255039  | -2.563946 | 1.495019  |
| C  | 2.120142  | -2.692754 | -0.992348 |
| C  | -2.775023 | 1.940944  | 0.185585  |
| C  | -2.120142 | 2.692754  | -0.992348 |
| C  | -2.255039 | 2.563946  | 1.495019  |
| C  | -4.301301 | 2.083142  | 0.095825  |
| C  | -3.186009 | -1.054656 | 1.134139  |
| C  | -4.602136 | -1.312975 | 0.592166  |
| C  | -2.379314 | -2.370921 | 1.108047  |
| C  | -3.253913 | -0.555360 | 2.586252  |
| H  | 3.346451  | -0.139960 | -2.139518 |
| H  | 2.747578  | 1.445744  | -1.673038 |
| H  | -2.747578 | -1.445744 | -1.673038 |
| H  | -3.346451 | 0.139960  | -2.139518 |
| H  | 2.895864  | 3.128969  | 1.713557  |
| H  | 2.273841  | 2.772883  | 0.092527  |

|   |           |           |           |
|---|-----------|-----------|-----------|
| H | 1.375305  | 2.217123  | 1.518729  |
| H | 5.226522  | 0.415312  | 0.609548  |
| H | 4.586698  | 1.695808  | -0.434707 |
| H | 5.095747  | 2.071536  | 1.216199  |
| H | 3.909424  | -0.316629 | 2.689092  |
| H | 3.661300  | 1.350262  | 3.226658  |
| H | 2.257403  | 0.292249  | 2.959345  |
| H | 4.566790  | -3.148356 | 0.038253  |
| H | 4.710054  | -1.593655 | -0.796819 |
| H | 4.803818  | -1.668665 | 0.976132  |
| H | 2.707145  | -2.111601 | 2.382484  |
| H | 1.169484  | -2.444803 | 1.576801  |
| H | 2.493141  | -3.637005 | 1.506520  |
| H | 2.467640  | -2.332646 | -1.966539 |
| H | 1.029791  | -2.594521 | -0.972773 |
| H | 2.375278  | -3.759004 | -0.917466 |
| H | -2.375278 | 3.759004  | -0.917466 |
| H | -1.029791 | 2.594521  | -0.972773 |
| H | -2.467640 | 2.332646  | -1.966539 |
| H | -2.707145 | 2.111601  | 2.382484  |
| H | -2.493141 | 3.637005  | 1.506520  |
| H | -1.169484 | 2.444803  | 1.576801  |
| H | -4.566790 | 3.148356  | 0.038253  |
| H | -4.710054 | 1.593655  | -0.796819 |
| H | -4.803818 | 1.668665  | 0.976132  |
| H | -5.095747 | -2.071536 | 1.216199  |
| H | -5.226522 | -0.415312 | 0.609548  |
| H | -4.586698 | -1.695808 | -0.434707 |
| H | -1.375305 | -2.217123 | 1.518729  |
| H | -2.895864 | -3.128969 | 1.713557  |
| H | -2.273841 | -2.772883 | 0.092527  |
| H | -3.661300 | -1.350262 | 3.226658  |
| H | -2.257403 | -0.292249 | 2.959345  |
| H | -3.909424 | 0.316629  | 2.689092  |

70

3,Ni+ el energy= -1133.59099658

|    |          |          |          |
|----|----------|----------|----------|
| Ni | 0.000000 | 0.000000 | 0.036100 |
| C  | 0.000000 | 0.000000 | 1.917768 |
| C  | 0.085145 | 1.217241 | 2.623812 |
| C  | 0.184046 | 2.522185 | 1.863803 |
| C  | 0.079742 | 1.211369 | 4.023667 |
| H  | 0.137498 | 2.150305 | 4.567691 |
| C  | 0.000000 | 0.000000 | 4.714779 |
| I  | 0.000000 | 0.000000 | 6.822823 |

|   |           |           |           |
|---|-----------|-----------|-----------|
| C | -0.079742 | -1.211369 | 4.023667  |
| H | -0.137498 | -2.150305 | 4.567691  |
| C | -0.085145 | -1.217241 | 2.623812  |
| C | -0.184046 | -2.522185 | 1.863803  |
| P | -0.437702 | 2.195022  | 0.141403  |
| P | 0.437702  | -2.195022 | 0.141403  |
| C | 0.608281  | 3.268117  | -1.015485 |
| C | 1.987805  | 2.575486  | -1.068451 |
| C | 0.775052  | 4.706999  | -0.496140 |
| C | 0.003741  | 3.276071  | -2.429872 |
| C | -2.289603 | 2.585545  | 0.132532  |
| C | -2.581748 | 4.093759  | 0.162853  |
| C | -2.912871 | 1.934241  | -1.117728 |
| C | -2.897553 | 1.915350  | 1.381974  |
| C | 2.289603  | -2.585545 | 0.132532  |
| C | 2.897553  | -1.915350 | 1.381974  |
| C | 2.912871  | -1.934241 | -1.117728 |
| C | 2.581748  | -4.093759 | 0.162853  |
| C | -0.608281 | -3.268117 | -1.015485 |
| C | -0.775052 | -4.706999 | -0.496140 |
| C | -1.987805 | -2.575486 | -1.068451 |
| C | -0.003741 | -3.276071 | -2.429872 |
| H | -0.357264 | 3.337960  | 2.356574  |
| H | 1.230895  | 2.839520  | 1.781915  |
| H | -1.230895 | -2.839520 | 1.781915  |
| H | 0.357264  | -3.337960 | 2.356574  |
| H | 2.668193  | 3.168642  | -1.692992 |
| H | 2.450518  | 2.477912  | -0.079069 |
| H | 1.919939  | 1.572579  | -1.510387 |
| H | -0.174755 | 5.245995  | -0.447844 |
| H | 1.237277  | 4.737014  | 0.496971  |
| H | 1.434579  | 5.259077  | -1.178824 |
| H | -0.934464 | 3.837628  | -2.476489 |
| H | 0.708395  | 3.757237  | -3.120265 |
| H | -0.182078 | 2.260892  | -2.804666 |
| H | -3.664054 | 4.248283  | 0.263246  |
| H | -2.100140 | 4.590708  | 1.013645  |
| H | -2.264550 | 4.595914  | -0.756488 |
| H | -2.537396 | 2.361584  | -2.051809 |
| H | -2.728430 | 0.852122  | -1.133384 |
| H | -4.000068 | 2.083785  | -1.099095 |
| H | -2.532663 | 2.355562  | 2.315779  |
| H | -2.690560 | 0.840156  | 1.412224  |
| H | -3.986255 | 2.051553  | 1.354957  |
| H | 3.986255  | -2.051553 | 1.354957  |



|   |           |           |           |
|---|-----------|-----------|-----------|
| H | 2.690560  | -0.840156 | 1.412224  |
| H | 2.532663  | -2.355562 | 2.315779  |
| H | 2.537396  | -2.361584 | -2.051809 |
| H | 4.000068  | -2.083785 | -1.099095 |
| H | 2.728430  | -0.852122 | -1.133384 |
| H | 3.664054  | -4.248283 | 0.263246  |
| H | 2.100140  | -4.590708 | 1.013645  |
| H | 2.264550  | -4.595914 | -0.756488 |
| H | -1.434579 | -5.259077 | -1.178824 |
| H | 0.174755  | -5.245995 | -0.447844 |
| H | -1.237277 | -4.737014 | 0.496971  |
| H | -1.919939 | -1.572579 | -1.510387 |
| H | -2.668193 | -3.168642 | -1.692992 |
| H | -2.450518 | -2.477912 | -0.079069 |
| H | -0.708395 | -3.757237 | -3.120265 |
| H | 0.182078  | -2.260892 | -2.804666 |
| H | 0.934464  | -3.837628 | -2.476489 |

74

3,Ni-H+CO2 el energy= -1322.97281298

|    |           |           |           |
|----|-----------|-----------|-----------|
| Ni | 1.169186  | -0.010570 | 0.001137  |
| P  | 1.019102  | 2.161353  | -0.089041 |
| P  | 1.009502  | -2.181556 | 0.033212  |
| O  | 4.752605  | -0.110904 | 2.151245  |
| O  | 5.525872  | 0.371832  | 0.004779  |
| C  | 2.015631  | 3.052693  | -1.436764 |
| C  | 1.967376  | 2.093977  | -2.645898 |
| C  | 3.481386  | 3.216171  | -1.005803 |
| C  | 1.431854  | 4.417456  | -1.841728 |
| C  | 1.175104  | 2.978138  | 1.618458  |
| C  | 2.512807  | 2.551268  | 2.249956  |
| C  | 1.063738  | 4.509202  | 1.588061  |
| C  | 0.035042  | 2.396067  | 2.480535  |
| C  | -0.770094 | 2.428449  | -0.588191 |
| C  | -1.530905 | 1.166887  | -0.226037 |
| C  | -2.931363 | 1.179782  | -0.190405 |
| C  | -3.611215 | -0.005040 | 0.094379  |
| C  | -2.924639 | -1.194116 | 0.343055  |
| C  | -1.523949 | -1.187727 | 0.315240  |
| C  | -0.789746 | -0.010538 | 0.033915  |
| C  | -0.753829 | -2.462374 | 0.607692  |
| C  | 2.069815  | -3.135560 | 1.282175  |
| C  | 2.069109  | -2.245666 | 2.543688  |
| C  | 1.517090  | -4.525562 | 1.641326  |
| C  | 3.511364  | -3.259238 | 0.762720  |

|   |           |           |           |
|---|-----------|-----------|-----------|
| C | 1.082317  | -2.913267 | -1.719171 |
| C | -0.092323 | -2.286858 | -2.499963 |
| C | 2.394137  | -2.462619 | -2.389697 |
| C | 0.962527  | -4.443807 | -1.760560 |
| C | 5.112575  | 0.129512  | 1.067748  |
| H | 2.417979  | 1.128379  | -2.391661 |
| H | 2.526387  | 2.532972  | -3.484198 |
| H | 0.941571  | 1.910980  | -2.990053 |
| H | 3.594504  | 3.958733  | -0.207954 |
| H | 4.074467  | 3.564150  | -1.863209 |
| H | 3.907201  | 2.265908  | -0.669170 |
| H | 2.026351  | 4.832258  | -2.668066 |
| H | 1.456351  | 5.141888  | -1.022741 |
| H | 0.397222  | 4.337750  | -2.193517 |
| H | 2.603266  | 1.461450  | 2.275341  |
| H | 2.565667  | 2.928248  | 3.281084  |
| H | 3.376383  | 2.947952  | 1.707273  |
| H | 0.147190  | 4.848074  | 1.089660  |
| H | 1.919802  | 4.971911  | 1.085763  |
| H | 1.040336  | 4.894187  | 2.617460  |
| H | 0.142651  | 2.767748  | 3.509021  |
| H | 0.069456  | 1.301669  | 2.502110  |
| H | -0.956640 | 2.689365  | 2.119886  |
| H | -1.204365 | 3.335009  | -0.146848 |
| H | -0.786751 | 2.575913  | -1.675869 |
| H | -3.484311 | 2.094085  | -0.391030 |
| I | -5.735925 | 0.000400  | 0.144954  |
| H | -3.472278 | -2.107474 | 0.561724  |
| H | -1.211606 | -3.352128 | 0.155855  |
| H | -0.720299 | -2.646599 | 1.689411  |
| H | 1.058165  | -2.101287 | 2.945153  |
| H | 2.497200  | -1.262275 | 2.329946  |
| H | 2.673080  | -2.723165 | 3.327918  |
| H | 0.501479  | -4.471533 | 2.049576  |
| H | 2.155119  | -4.978769 | 2.413298  |
| H | 1.502630  | -5.205356 | 0.784909  |
| H | 4.172010  | -3.573091 | 1.582558  |
| H | 3.876958  | -2.302285 | 0.376106  |
| H | 3.594591  | -4.007256 | -0.033709 |
| H | -1.068202 | -2.584510 | -2.101743 |
| H | -0.039583 | -2.619448 | -3.545973 |
| H | -0.047088 | -1.193081 | -2.480296 |
| H | 2.382710  | -2.761973 | -3.447232 |
| H | 3.276990  | -2.912171 | -1.925923 |
| H | 2.506119  | -1.374641 | -2.335381 |

|   |          |           |           |
|---|----------|-----------|-----------|
| H | 0.887264 | -4.775834 | -2.805784 |
| H | 0.068369 | -4.803482 | -1.236598 |
| H | 1.838486 | -4.935696 | -1.324572 |
| H | 2.718164 | -0.016360 | -0.034780 |

74

3,Ni-(H)-formate el energy= -1322.96636770

|    |           |           |           |
|----|-----------|-----------|-----------|
| Ni | 1.198485  | -0.000331 | -0.000279 |
| P  | 1.064189  | 2.207666  | -0.085440 |
| P  | 1.063287  | -2.207994 | 0.085201  |
| O  | 4.508451  | -0.200864 | 1.133815  |
| O  | 4.510006  | 0.202252  | -1.131945 |
| C  | 2.068139  | 3.163178  | -1.385029 |
| C  | 2.150140  | 2.205112  | -2.593639 |
| C  | 3.494763  | 3.471493  | -0.901403 |
| C  | 1.381765  | 4.477478  | -1.802923 |
| C  | 1.185065  | 2.947301  | 1.655196  |
| C  | 2.546405  | 2.555846  | 2.262533  |
| C  | 1.001899  | 4.472301  | 1.683557  |
| C  | 0.072898  | 2.281367  | 2.491735  |
| C  | -0.710243 | 2.441146  | -0.621745 |
| C  | -1.464990 | 1.176457  | -0.277601 |
| C  | -2.865817 | 1.184135  | -0.271141 |
| C  | -3.552339 | 0.000609  | -0.000827 |
| C  | -2.866373 | -1.183197 | 0.269667  |
| C  | -1.465543 | -1.176076 | 0.276556  |
| C  | -0.732559 | 0.000061  | -0.000368 |
| C  | -0.711408 | -2.441120 | 0.620780  |
| C  | 2.066727  | -3.163115 | 1.385437  |
| C  | 2.148025  | -2.204851 | 2.593937  |
| C  | 1.380344  | -4.477454 | 1.803209  |
| C  | 3.493624  | -3.471249 | 0.902518  |
| C  | 1.184987  | -2.947826 | -1.655256 |
| C  | 0.072938  | -2.282229 | -2.492223 |
| C  | 2.546453  | -2.556109 | -2.262144 |
| C  | 1.002210  | -4.472877 | -1.683489 |
| C  | 4.125444  | 0.000129  | 0.000568  |
| H  | 2.754368  | 1.325277  | -2.350265 |
| H  | 2.628063  | 2.725436  | -3.435403 |
| H  | 1.158210  | 1.874606  | -2.929656 |
| H  | 3.505174  | 4.204257  | -0.087665 |
| H  | 4.060727  | 3.903222  | -1.738353 |
| H  | 4.027587  | 2.571800  | -0.585941 |
| H  | 2.003243  | 4.973013  | -2.561410 |
| H  | 1.265106  | 5.173434  | -0.966369 |

|   |           |           |           |
|---|-----------|-----------|-----------|
| H | 0.395747  | 4.312976  | -2.250127 |
| H | 2.719336  | 1.475764  | 2.217108  |
| H | 2.569203  | 2.862460  | 3.317520  |
| H | 3.385928  | 3.042181  | 1.758601  |
| H | 0.056387  | 4.784587  | 1.222895  |
| H | 1.820515  | 4.994797  | 1.178240  |
| H | 0.987904  | 4.816224  | 2.727211  |
| H | 0.150823  | 2.636678  | 3.528310  |
| H | 0.172140  | 1.190685  | 2.493590  |
| H | -0.931597 | 2.523436  | 2.127598  |
| H | -1.165860 | 3.342371  | -0.192520 |
| H | -0.701675 | 2.583341  | -1.709586 |
| H | -3.411866 | 2.099458  | -0.484109 |
| I | -5.673820 | 0.001035  | -0.001138 |
| H | -3.412855 | -2.098314 | 0.482414  |
| H | -1.167134 | -3.342089 | 0.191131  |
| H | -0.703359 | -2.583587 | 1.708585  |
| H | 1.155910  | -1.874300 | 2.929350  |
| H | 2.752400  | -1.325064 | 2.350762  |
| H | 2.625478  | -2.725035 | 3.436056  |
| H | 0.394067  | -4.313023 | 2.249868  |
| H | 2.001498  | -4.972755 | 2.562117  |
| H | 1.264230  | -5.173575 | 0.966725  |
| H | 4.059201  | -3.903023 | 1.739705  |
| H | 4.026512  | -2.571452 | 0.587445  |
| H | 3.504519  | -4.203892 | 0.088675  |
| H | -0.931619 | -2.524542 | -2.128415 |
| H | 0.151306  | -2.637566 | -3.528754 |
| H | 0.171904  | -1.191519 | -2.494084 |
| H | 2.569788  | -2.863009 | -3.317034 |
| H | 3.385922  | -3.042035 | -1.757720 |
| H | 2.718987  | -1.475950 | -2.216952 |
| H | 0.988598  | -4.816936 | -2.727103 |
| H | 0.056648  | -4.785344 | -1.223050 |
| H | 1.820823  | -4.995094 | -1.177877 |
| H | 2.803710  | -0.002173 | -0.000866 |

74

3, TS-2-3 el energy= -1322.96569093

|    |          |           |           |
|----|----------|-----------|-----------|
| Ni | 1.201059 | 0.000055  | -0.000012 |
| P  | 1.053363 | 2.193623  | -0.089956 |
| P  | 1.053977 | -2.193547 | 0.089861  |
| O  | 4.634254 | -0.139555 | 1.150872  |
| O  | 4.635020 | 0.141018  | -1.148712 |
| C  | 2.064666 | 3.150275  | -1.383224 |

|   |           |           |           |
|---|-----------|-----------|-----------|
| C | 2.151171  | 2.193530  | -2.592106 |
| C | 3.488520  | 3.449922  | -0.887758 |
| C | 1.390891  | 4.467903  | -1.809927 |
| C | 1.161375  | 2.949197  | 1.646488  |
| C | 2.510598  | 2.547246  | 2.273071  |
| C | 0.992935  | 4.475943  | 1.664428  |
| C | 0.033816  | 2.301059  | 2.476653  |
| C | -0.720506 | 2.435034  | -0.635880 |
| C | -1.480104 | 1.173114  | -0.285948 |
| C | -2.880968 | 1.181841  | -0.280721 |
| C | -3.566112 | -0.000684 | -0.001281 |
| C | -2.880747 | -1.182989 | 0.278549  |
| C | -1.479890 | -1.173815 | 0.284549  |
| C | -0.744585 | -0.000236 | -0.000509 |
| C | -0.720074 | -2.435470 | 0.634957  |
| C | 2.064952  | -3.149896 | 1.383607  |
| C | 2.150618  | -2.193122 | 2.592527  |
| C | 1.391350  | -4.467712 | 1.810004  |
| C | 3.489123  | -3.449134 | 0.888808  |
| C | 1.163008  | -2.949098 | -1.646530 |
| C | 0.035637  | -2.301308 | -2.477221 |
| C | 2.512396  | -2.546740 | -2.272491 |
| C | 0.995037  | -4.475895 | -1.664537 |
| C | 4.350690  | 0.000656  | 0.000975  |
| H | 2.725588  | 1.297017  | -2.339179 |
| H | 2.656991  | 2.703085  | -3.424161 |
| H | 1.159093  | 1.884388  | -2.946587 |
| H | 3.497433  | 4.193150  | -0.083591 |
| H | 4.074246  | 3.860597  | -1.721695 |
| H | 4.003132  | 2.549518  | -0.545190 |
| H | 2.018069  | 4.957851  | -2.567648 |
| H | 1.274052  | 5.167054  | -0.976261 |
| H | 0.405655  | 4.306980  | -2.260091 |
| H | 2.661999  | 1.463658  | 2.238018  |
| H | 2.528233  | 2.864882  | 3.324977  |
| H | 3.362534  | 3.014785  | 1.771737  |
| H | 0.057187  | 4.794149  | 1.188299  |
| H | 1.823317  | 4.988576  | 1.168134  |
| H | 0.966971  | 4.826302  | 2.705829  |
| H | 0.106717  | 2.660435  | 3.512346  |
| H | 0.118695  | 1.209314  | 2.483027  |
| H | -0.963998 | 2.554003  | 2.102089  |
| H | -1.174193 | 3.340972  | -0.213943 |
| H | -0.707171 | 2.571440  | -1.724687 |
| H | -3.428824 | 2.094508  | -0.500889 |

|   |           |           |           |
|---|-----------|-----------|-----------|
| I | -5.689117 | -0.001024 | -0.001876 |
| H | -3.428433 | -2.095828 | 0.498425  |
| H | -1.173284 | -3.341596 | 0.212911  |
| H | -0.707199 | -2.571748 | 1.723787  |
| H | 1.158284  | -1.884274 | 2.946547  |
| H | 2.724891  | -1.296442 | 2.339869  |
| H | 2.656198  | -2.702532 | 3.424817  |
| H | 0.405869  | -4.307057 | 2.259726  |
| H | 2.018324  | -4.957490 | 2.568004  |
| H | 1.275075  | -5.166893 | 0.976284  |
| H | 4.074573  | -3.859655 | 1.723014  |
| H | 4.003641  | -2.548575 | 0.546503  |
| H | 3.498630  | -4.192341 | 0.084629  |
| H | -0.962274 | -2.554555 | -2.103119 |
| H | 0.109130  | -2.660668 | -3.512878 |
| H | 0.120183  | -1.209538 | -2.483561 |
| H | 2.530619  | -2.864377 | -3.324387 |
| H | 3.364246  | -3.014008 | -1.770757 |
| H | 2.663439  | -1.463105 | -2.237373 |
| H | 0.969678  | -4.826270 | -2.705948 |
| H | 0.059158  | -4.794378 | -1.188854 |
| H | 1.825336  | -4.988274 | -1.167841 |
| H | 2.772478  | 0.000282  | 0.000412  |

74

3,Ni-(O)-formate-isomer      el energy= -1322.99246259

|    |           |           |           |
|----|-----------|-----------|-----------|
| Ni | 1.237074  | 0.087191  | 0.027927  |
| P  | 1.120097  | -2.149538 | 0.159075  |
| P  | 0.995605  | 2.301146  | -0.060092 |
| O  | 3.161932  | 0.121849  | 0.271978  |
| O  | 5.207985  | -0.608403 | -0.284305 |
| C  | 2.183082  | -3.013332 | 1.476758  |
| C  | 2.261445  | -1.997258 | 2.636934  |
| C  | 3.610571  | -3.297952 | 0.979176  |
| C  | 1.542889  | -4.323015 | 1.974862  |
| C  | 1.187074  | -2.998662 | -1.535780 |
| C  | 2.479779  | -2.558167 | -2.247359 |
| C  | 1.112573  | -4.530726 | -1.451510 |
| C  | -0.012325 | -2.475015 | -2.351727 |
| C  | -0.631917 | -2.375235 | 0.750375  |
| C  | -1.409750 | -1.147065 | 0.333102  |
| C  | -2.808967 | -1.199383 | 0.311251  |
| C  | -3.531190 | -0.050699 | -0.008503 |
| C  | -2.877782 | 1.145805  | -0.297379 |
| C  | -1.477248 | 1.184296  | -0.285774 |

|   |           |           |           |
|---|-----------|-----------|-----------|
| C | -0.701419 | 0.038165  | 0.015380  |
| C | -0.776206 | 2.487963  | -0.603515 |
| C | 1.987956  | 3.277021  | -1.345850 |
| C | 1.983906  | 2.388141  | -2.608100 |
| C | 1.359983  | 4.639131  | -1.691068 |
| C | 3.436762  | 3.473949  | -0.867912 |
| C | 1.096329  | 3.032667  | 1.687155  |
| C | 0.022575  | 2.295501  | 2.515809  |
| C | 2.479007  | 2.706195  | 2.287599  |
| C | 0.834801  | 4.545125  | 1.741562  |
| C | 4.130259  | -0.102659 | -0.559526 |
| H | 2.789097  | -1.095311 | 2.313536  |
| H | 2.811454  | -2.448224 | 3.474544  |
| H | 1.268058  | -1.712735 | 3.009832  |
| H | 3.626503  | -4.038815 | 0.171868  |
| H | 4.187343  | -3.721277 | 1.813875  |
| H | 4.133455  | -2.395792 | 0.648554  |
| H | 2.176525  | -4.742699 | 2.768363  |
| H | 1.462261  | -5.076937 | 1.186143  |
| H | 0.546522  | -4.169255 | 2.403806  |
| H | 2.480135  | -1.475263 | -2.411633 |
| H | 2.539166  | -3.047904 | -3.229302 |
| H | 3.385731  | -2.809929 | -1.689287 |
| H | 0.225000  | -4.870459 | -0.903624 |
| H | 1.998229  | -4.960570 | -0.973882 |
| H | 1.051222  | -4.946370 | -2.467130 |
| H | 0.062357  | -2.862550 | -3.377146 |
| H | -0.022187 | -1.380777 | -2.397804 |
| H | -0.974375 | -2.799879 | -1.940853 |
| H | -1.086170 | -3.310689 | 0.400840  |
| H | -0.596206 | -2.434216 | 1.845620  |
| H | -3.325967 | -2.124592 | 0.552141  |
| I | -5.651050 | -0.121663 | -0.042584 |
| H | -3.448043 | 2.040699  | -0.532774 |
| H | -1.270357 | 3.353676  | -0.144682 |
| H | -0.774979 | 2.668472  | -1.685910 |
| H | 0.968958  | 2.197683  | -2.978561 |
| H | 2.460316  | 1.421727  | -2.417245 |
| H | 2.540400  | 2.892185  | -3.410013 |
| H | 0.339379  | 4.540187  | -2.077850 |
| H | 1.961238  | 5.120360  | -2.475237 |
| H | 1.334431  | 5.316828  | -0.833407 |
| H | 4.055220  | 3.810591  | -1.711154 |
| H | 3.865416  | 2.547200  | -0.477435 |
| H | 3.501542  | 4.240091  | -0.087803 |

|   |           |          |           |
|---|-----------|----------|-----------|
| H | -0.993692 | 2.475528 | 2.148330  |
| H | 0.074235  | 2.651058 | 3.553836  |
| H | 0.189569  | 1.213104 | 2.514095  |
| H | 2.455919  | 2.909302 | 3.367151  |
| H | 3.272102  | 3.321579 | 1.853719  |
| H | 2.753487  | 1.657937 | 2.132185  |
| H | 0.787253  | 4.867110 | 2.791275  |
| H | -0.116204 | 4.822394 | 1.269804  |
| H | 1.637321  | 5.115462 | 1.262615  |
| H | 3.930528  | 0.212714 | -1.612212 |

74

3,Ni-(O)-formate el energy= -1323.00272269

|    |           |           |           |
|----|-----------|-----------|-----------|
| Ni | 1.298387  | 0.097651  | 0.155003  |
| P  | 1.195141  | -2.158690 | 0.177598  |
| P  | 1.003458  | 2.302873  | -0.037932 |
| O  | 3.181702  | 0.294826  | 0.631522  |
| O  | 4.156676  | -0.225581 | -1.342559 |
| C  | 2.314800  | -3.103145 | 1.387860  |
| C  | 2.485150  | -2.158966 | 2.598164  |
| C  | 3.693007  | -3.374159 | 0.760385  |
| C  | 1.698208  | -4.429443 | 1.869214  |
| C  | 1.109236  | -2.969133 | -1.543854 |
| C  | 2.421649  | -2.715364 | -2.307597 |
| C  | 0.821329  | -4.477748 | -1.483139 |
| C  | -0.032284 | -2.264977 | -2.306827 |
| C  | -0.516232 | -2.372811 | 0.889802  |
| C  | -1.324155 | -1.166437 | 0.468710  |
| C  | -2.723335 | -1.232900 | 0.480267  |
| C  | -3.462727 | -0.112196 | 0.104929  |
| C  | -2.827783 | 1.068059  | -0.279130 |
| C  | -1.428083 | 1.120122  | -0.292964 |
| C  | -0.636922 | 0.006571  | 0.076603  |
| C  | -0.732820 | 2.396796  | -0.708957 |
| C  | 2.052689  | 3.223442  | -1.320962 |
| C  | 2.198459  | 2.238695  | -2.502285 |
| C  | 1.382020  | 4.517048  | -1.819459 |
| C  | 3.445800  | 3.548965  | -0.756304 |
| C  | 0.951969  | 3.160196  | 1.654614  |
| C  | -0.163034 | 2.458767  | 2.458742  |
| C  | 2.291393  | 2.922031  | 2.379993  |
| C  | 0.651616  | 4.664373  | 1.572826  |
| C  | 4.180388  | 0.075628  | -0.150700 |
| H  | 2.981515  | -1.229703 | 2.305571  |
| H  | 3.089989  | -2.663660 | 3.364725  |



|   |           |           |           |
|---|-----------|-----------|-----------|
| H | 1.521387  | -1.902830 | 3.057948  |
| H | 3.647401  | -4.180691 | 0.020698  |
| H | 4.390842  | -3.689952 | 1.548314  |
| H | 4.111750  | -2.489841 | 0.271715  |
| H | 2.385157  | -4.899741 | 2.586954  |
| H | 1.536072  | -5.140146 | 1.054130  |
| H | 0.743352  | -4.278548 | 2.385045  |
| H | 2.729172  | -1.666871 | -2.264198 |
| H | 2.278303  | -3.001968 | -3.359018 |
| H | 3.249657  | -3.312815 | -1.915771 |
| H | -0.080416 | -4.713961 | -0.905098 |
| H | 1.661384  | -5.036982 | -1.058809 |
| H | 0.663487  | -4.852530 | -2.504132 |
| H | -0.069940 | -2.671667 | -3.326667 |
| H | 0.137194  | -1.185420 | -2.373682 |
| H | -1.012735 | -2.420836 | -1.845143 |
| H | -0.987723 | -3.320080 | 0.601177  |
| H | -0.407177 | -2.393794 | 1.982002  |
| H | -3.225958 | -2.147849 | 0.782854  |
| I | -5.582517 | -0.202033 | 0.124402  |
| H | -3.411675 | 1.938841  | -0.565688 |
| H | -1.268910 | 3.297970  | -0.386341 |
| H | -0.655620 | 2.450115  | -1.802364 |
| H | 1.223418  | 1.936935  | -2.907052 |
| H | 2.750245  | 1.337026  | -2.217795 |
| H | 2.748314  | 2.736404  | -3.313541 |
| H | 0.411049  | 4.325991  | -2.289967 |
| H | 2.026796  | 4.978265  | -2.580617 |
| H | 1.235758  | 5.251384  | -1.022073 |
| H | 4.104050  | 3.859372  | -1.578986 |
| H | 3.900074  | 2.683261  | -0.268026 |
| H | 3.407460  | 4.373507  | -0.035509 |
| H | -1.154376 | 2.592213  | 2.012556  |
| H | -0.188135 | 2.885239  | 3.470894  |
| H | 0.020124  | 1.382247  | 2.543383  |
| H | 2.187712  | 3.228717  | 3.430183  |
| H | 3.105549  | 3.507824  | 1.943642  |
| H | 2.586646  | 1.869006  | 2.345124  |
| H | 0.522258  | 5.063729  | 2.588630  |
| H | -0.270233 | 4.876322  | 1.017091  |
| H | 1.471384  | 5.219795  | 1.105854  |
| H | 5.158231  | 0.190283  | 0.369165  |

74

3,TS-3-4i el energy= -1322.96098092

|    |           |           |           |
|----|-----------|-----------|-----------|
| Ni | 0.004014  | -0.004659 | -0.041856 |
| P  | -2.243759 | 0.201021  | 0.118092  |
| P  | 2.237461  | 0.127932  | -0.097484 |
| O  | -0.094278 | -2.135362 | -1.341011 |
| O  | -0.739124 | -3.405444 | 0.444464  |
| C  | -3.220280 | -0.809413 | 1.407506  |
| C  | -2.219220 | -1.105314 | 2.545488  |
| C  | -3.734640 | -2.142791 | 0.838893  |
| C  | -4.412453 | -0.008932 | 1.969255  |
| C  | -3.102017 | 0.267228  | -1.576646 |
| C  | -2.973506 | -1.095209 | -2.285302 |
| C  | -4.581495 | 0.672706  | -1.476911 |
| C  | -2.338350 | 1.317078  | -2.410251 |
| C  | -2.325026 | 1.941825  | 0.776713  |
| C  | -1.087398 | 2.669877  | 0.316341  |
| C  | -1.076614 | 4.070197  | 0.298768  |
| C  | 0.091163  | 4.742098  | -0.059549 |
| C  | 1.247893  | 4.035813  | -0.383960 |
| C  | 1.225777  | 2.635115  | -0.374302 |
| C  | 0.052389  | 1.917484  | -0.047140 |
| C  | 2.487049  | 1.871554  | -0.700555 |
| C  | 3.237303  | -0.918218 | -1.330186 |
| C  | 2.446214  | -0.873428 | -2.656110 |
| C  | 4.649381  | -0.352094 | -1.573207 |
| C  | 3.330485  | -2.377252 | -0.854857 |
| C  | 2.932260  | 0.091514  | 1.674964  |
| C  | 2.315264  | 1.289412  | 2.425866  |
| C  | 2.463845  | -1.200110 | 2.372303  |
| C  | 4.464188  | 0.192062  | 1.736155  |
| C  | -0.243714 | -2.451334 | -0.140795 |
| H  | -1.469532 | -1.834334 | 2.224562  |
| H  | -2.763444 | -1.532666 | 3.399153  |
| H  | -1.708826 | -0.199077 | 2.898819  |
| H  | -4.541655 | -1.991753 | 0.114278  |
| H  | -4.146746 | -2.734840 | 1.667997  |
| H  | -2.937122 | -2.735253 | 0.382890  |
| H  | -4.955196 | -0.646153 | 2.680695  |
| H  | -5.120201 | 0.293154  | 1.191356  |
| H  | -4.098554 | 0.888182  | 2.513319  |
| H  | -1.938963 | -1.449597 | -2.301427 |
| H  | -3.326162 | -0.983885 | -3.320387 |
| H  | -3.583717 | -1.868585 | -1.811543 |
| H  | -4.723289 | 1.628803  | -0.958345 |
| H  | -5.182784 | -0.088744 | -0.969999 |
| H  | -4.987887 | 0.787980  | -2.491350 |

|   |           |           |           |
|---|-----------|-----------|-----------|
| H | -2.774804 | 1.346987  | -3.417869 |
| H | -1.278472 | 1.057531  | -2.503841 |
| H | -2.401349 | 2.324592  | -1.985487 |
| H | -3.252244 | 2.459898  | 0.505637  |
| H | -2.315020 | 1.863227  | 1.871295  |
| H | -1.969623 | 4.625541  | 0.572903  |
| I | 0.113683  | 6.861712  | -0.088910 |
| H | 2.161637  | 4.564607  | -0.642006 |
| H | 3.383581  | 2.338510  | -0.274198 |
| H | 2.641599  | 1.823431  | -1.785239 |
| H | 2.360757  | 0.145754  | -3.053739 |
| H | 1.446220  | -1.293596 | -2.527698 |
| H | 2.987520  | -1.468886 | -3.404370 |
| H | 4.629004  | 0.695433  | -1.895230 |
| H | 5.119063  | -0.930160 | -2.380903 |
| H | 5.296808  | -0.428485 | -0.696626 |
| H | 3.819036  | -2.975011 | -1.636435 |
| H | 2.339875  | -2.806683 | -0.683843 |
| H | 3.930736  | -2.477934 | 0.056194  |
| H | 2.644409  | 2.253766  | 2.024064  |
| H | 2.625838  | 1.240550  | 3.478476  |
| H | 1.221462  | 1.268041  | 2.388404  |
| H | 2.858133  | -1.216594 | 3.397662  |
| H | 2.810687  | -2.106135 | 1.866649  |
| H | 1.371321  | -1.246845 | 2.428902  |
| H | 4.774183  | 0.311514  | 2.783529  |
| H | 4.848773  | 1.055041  | 1.179270  |
| H | 4.949184  | -0.711489 | 1.353683  |
| H | 0.206097  | -1.646314 | 0.627241  |

74

3,TS-4i-4      el energy= -1322.99023550

|    |           |           |           |
|----|-----------|-----------|-----------|
| Ni | 1.276012  | 0.101156  | -0.026011 |
| P  | 1.181790  | -2.149665 | 0.153654  |
| P  | 0.988433  | 2.313036  | -0.088316 |
| O  | 3.218125  | 0.288915  | 0.049542  |
| O  | 4.881777  | -1.045641 | -0.704885 |
| C  | 2.250858  | -3.010794 | 1.473341  |
| C  | 2.451166  | -1.933076 | 2.560387  |
| C  | 3.627574  | -3.426521 | 0.932914  |
| C  | 1.549389  | -4.241922 | 2.078730  |
| C  | 1.177153  | -3.048659 | -1.516394 |
| C  | 2.465203  | -2.675454 | -2.272395 |
| C  | 1.049344  | -4.573765 | -1.378797 |
| C  | -0.025452 | -2.511612 | -2.318728 |

|   |           |           |           |
|---|-----------|-----------|-----------|
| C | -0.553951 | -2.340857 | 0.806756  |
| C | -1.351254 | -1.146391 | 0.343789  |
| C | -2.749472 | -1.219525 | 0.319611  |
| C | -3.486894 | -0.093797 | -0.043723 |
| C | -2.848803 | 1.101226  | -0.370086 |
| C | -1.449102 | 1.160158  | -0.353693 |
| C | -0.658651 | 0.034747  | -0.014128 |
| C | -0.763597 | 2.465110  | -0.695376 |
| C | 2.006115  | 3.332785  | -1.319470 |
| C | 2.099315  | 2.453487  | -2.584857 |
| C | 1.338586  | 4.670042  | -1.688605 |
| C | 3.420213  | 3.585892  | -0.769876 |
| C | 1.010244  | 3.026942  | 1.670261  |
| C | -0.118773 | 2.318587  | 2.447669  |
| C | 2.352848  | 2.660688  | 2.333728  |
| C | 0.784029  | 4.545340  | 1.720845  |
| C | 4.210319  | -0.023127 | -0.720644 |
| H | 3.014501  | -1.086331 | 2.155806  |
| H | 3.012063  | -2.364817 | 3.401029  |
| H | 1.496511  | -1.559697 | 2.956494  |
| H | 3.553527  | -4.255286 | 0.219502  |
| H | 4.236760  | -3.781434 | 1.776815  |
| H | 4.153058  | -2.593086 | 0.456484  |
| H | 2.215456  | -4.686677 | 2.830901  |
| H | 1.339707  | -5.012253 | 1.329830  |
| H | 0.610902  | -3.992376 | 2.585238  |
| H | 2.509155  | -1.595537 | -2.452310 |
| H | 2.469315  | -3.181930 | -3.247910 |
| H | 3.376444  | -2.949749 | -1.737130 |
| H | 0.155799  | -4.862837 | -0.811537 |
| H | 1.923657  | -5.020125 | -0.896171 |
| H | 0.960938  | -5.020172 | -2.379265 |
| H | 0.008380  | -2.939025 | -3.330401 |
| H | 0.002684  | -1.420221 | -2.406755 |
| H | -0.987269 | -2.784908 | -1.871519 |
| H | -1.013830 | -3.298252 | 0.532722  |
| H | -0.482677 | -2.327891 | 1.901557  |
| H | -3.253130 | -2.143339 | 0.591787  |
| I | -5.605183 | -0.196229 | -0.084139 |
| H | -3.429701 | 1.980445  | -0.636285 |
| H | -1.287188 | 3.337554  | -0.284295 |
| H | -0.723734 | 2.606705  | -1.782987 |
| H | 1.111293  | 2.230462  | -3.006994 |
| H | 2.599587  | 1.504745  | -2.373981 |
| H | 2.675041  | 2.984880  | -3.355011 |

|   |           |          |           |
|---|-----------|----------|-----------|
| H | 0.345208  | 4.530798 | -2.129877 |
| H | 1.959354  | 5.181774 | -2.437455 |
| H | 1.239061  | 5.339966 | -0.830272 |
| H | 4.061443  | 3.963952 | -1.578034 |
| H | 3.862791  | 2.667516 | -0.376213 |
| H | 3.415387  | 4.340930 | 0.024043  |
| H | -1.112546 | 2.535835 | 2.041330  |
| H | -0.097532 | 2.665414 | 3.489789  |
| H | 0.011637  | 1.231655 | 2.443592  |
| H | 2.304230  | 2.913532 | 3.401975  |
| H | 3.194108  | 3.207929 | 1.900112  |
| H | 2.569446  | 1.592082 | 2.236931  |
| H | 0.700358  | 4.864337 | 2.769221  |
| H | -0.140971 | 4.844214 | 1.212058  |
| H | 1.617183  | 5.099490 | 1.277003  |
| H | 4.486265  | 0.774881 | -1.452912 |

59

4,Ni-H el energy= -966.312418964

|    |           |           |           |
|----|-----------|-----------|-----------|
| Ni | 0.000000  | 0.000000  | 0.338288  |
| H  | 0.000000  | 0.000000  | 1.886182  |
| C  | 0.000000  | 0.000000  | -1.624243 |
| C  | 1.131939  | 0.433381  | -2.358590 |
| C  | 2.341014  | 0.910709  | -1.572730 |
| C  | 1.131629  | 0.428428  | -3.758522 |
| H  | 2.010413  | 0.764098  | -4.309107 |
| C  | 0.000000  | 0.000000  | -4.457178 |
| H  | 0.000000  | 0.000000  | -5.545624 |
| C  | -1.131629 | -0.428428 | -3.758522 |
| H  | -2.010413 | -0.764098 | -4.309107 |
| C  | -1.131939 | -0.433381 | -2.358590 |
| C  | -2.341014 | -0.910709 | -1.572730 |
| P  | 2.141400  | 0.219083  | 0.157076  |
| P  | -2.141400 | -0.219083 | 0.157076  |
| C  | 3.107647  | 1.403502  | 1.238967  |
| C  | 3.399416  | 0.820977  | 2.627186  |
| C  | 2.302395  | 2.706915  | 1.362280  |
| C  | 3.076014  | -1.412839 | 0.161250  |
| C  | 2.580382  | -2.289156 | 1.323875  |
| C  | 2.893978  | -2.162108 | -1.167891 |
| C  | -3.076014 | 1.412839  | 0.161250  |
| C  | -2.893978 | 2.162108  | -1.167891 |
| C  | -2.580382 | 2.289156  | 1.323875  |
| C  | -3.107647 | -1.403502 | 1.238967  |
| C  | -2.302395 | -2.706915 | 1.362280  |

|   |           |           |           |
|---|-----------|-----------|-----------|
| C | -3.399416 | -0.820977 | 2.627186  |
| H | 3.298080  | 0.634201  | -2.035834 |
| H | 2.341898  | 2.006074  | -1.481586 |
| H | -2.341898 | -2.006074 | -1.481586 |
| H | -3.298080 | -0.634201 | -2.035834 |
| H | 2.468104  | 0.510470  | 3.117235  |
| H | 4.071772  | -0.043044 | 2.580528  |
| H | 3.878427  | 1.581093  | 3.258777  |
| H | 1.337833  | 2.506122  | 1.844584  |
| H | 2.851287  | 3.437063  | 1.972029  |
| H | 2.101604  | 3.168813  | 0.388250  |
| H | 2.689586  | -1.804258 | 2.297840  |
| H | 1.515383  | -2.514311 | 1.192165  |
| H | 3.137832  | -3.235627 | 1.345598  |
| H | 3.311204  | -1.617800 | -2.021091 |
| H | 1.832053  | -2.336625 | -1.374259 |
| H | 3.397754  | -3.136368 | -1.111113 |
| H | -3.397754 | 3.136368  | -1.111113 |
| H | -1.832053 | 2.336625  | -1.374259 |
| H | -3.311204 | 1.617800  | -2.021091 |
| H | -2.689586 | 1.804258  | 2.297840  |
| H | -3.137832 | 3.235627  | 1.345598  |
| H | -1.515383 | 2.514311  | 1.192165  |
| H | -1.337833 | -2.506122 | 1.844584  |
| H | -2.851287 | -3.437063 | 1.972029  |
| H | -2.101604 | -3.168813 | 0.388250  |
| H | -3.878427 | -1.581093 | 3.258777  |
| H | -2.468104 | -0.510470 | 3.117235  |
| H | -4.071772 | 0.043044  | 2.580528  |
| H | 4.059911  | 1.606438  | 0.724266  |
| H | 4.143223  | -1.179983 | 0.300105  |
| H | -4.143223 | 1.179983  | 0.300105  |
| H | -4.059911 | -1.606438 | 0.724266  |

58

4, Ni+      el energy= -965.525459103

|    |           |           |           |
|----|-----------|-----------|-----------|
| Ni | 0.000000  | 0.000000  | -0.033348 |
| C  | 0.000000  | 0.000000  | -1.921144 |
| C  | -0.383876 | 1.162402  | -2.622370 |
| C  | -0.785739 | 2.400525  | -1.851665 |
| C  | -0.374707 | 1.149760  | -4.022369 |
| H  | -0.660677 | 2.047383  | -4.567224 |
| C  | 0.000000  | 0.000000  | -4.718272 |
| H  | 0.000000  | 0.000000  | -5.805211 |
| C  | 0.374707  | -1.149760 | -4.022369 |

|   |           |           |           |
|---|-----------|-----------|-----------|
| H | 0.660677  | -2.047383 | -4.567224 |
| C | 0.383876  | -1.162402 | -2.622370 |
| C | 0.785739  | -2.400525 | -1.851665 |
| P | -0.020933 | 2.234225  | -0.167317 |
| P | 0.020933  | -2.234225 | -0.167317 |
| C | -1.096261 | 3.238027  | 0.987981  |
| C | -0.421779 | 3.518815  | 2.337485  |
| C | -2.439504 | 2.514547  | 1.178807  |
| C | 1.685369  | 3.005218  | -0.226720 |
| C | 2.553767  | 2.403998  | 0.892429  |
| C | 2.355077  | 2.796000  | -1.593259 |
| C | -1.685369 | -3.005218 | -0.226720 |
| C | -2.355077 | -2.796000 | -1.593259 |
| C | -2.553767 | -2.403998 | 0.892429  |
| C | 1.096261  | -3.238027 | 0.987981  |
| C | 2.439504  | -2.514547 | 1.178807  |
| C | 0.421779  | -3.518815 | 2.337485  |
| H | -0.490979 | 3.327920  | -2.356396 |
| H | -1.873883 | 2.442026  | -1.712698 |
| H | 1.873883  | -2.442026 | -1.712698 |
| H | 0.490979  | -3.327920 | -2.356396 |
| H | -0.170448 | 2.588123  | 2.863328  |
| H | 0.491753  | 4.113022  | 2.232278  |
| H | -1.109788 | 4.081962  | 2.979468  |
| H | -2.298497 | 1.562036  | 1.706844  |
| H | -3.114132 | 3.133151  | 1.782821  |
| H | -2.946655 | 2.302401  | 0.230578  |
| H | 2.110036  | 2.516637  | 1.886797  |
| H | 2.717560  | 1.333322  | 0.711398  |
| H | 3.534812  | 2.894088  | 0.907389  |
| H | 1.806828  | 3.274618  | -2.410801 |
| H | 2.452569  | 1.730127  | -1.829356 |
| H | 3.362007  | 3.230157  | -1.569892 |
| H | -3.362007 | -3.230157 | -1.569892 |
| H | -2.452569 | -1.730127 | -1.829356 |
| H | -1.806828 | -3.274618 | -2.410801 |
| H | -2.110036 | -2.516637 | 1.886797  |
| H | -3.534812 | -2.894088 | 0.907389  |
| H | -2.717560 | -1.333322 | 0.711398  |
| H | 2.298497  | -1.562036 | 1.706844  |
| H | 3.114132  | -3.133151 | 1.782821  |
| H | 2.946655  | -2.302401 | 0.230578  |
| H | 1.109788  | -4.081962 | 2.979468  |
| H | 0.170448  | -2.588123 | 2.863328  |
| H | -0.491753 | -4.113022 | 2.232278  |

|   |           |           |           |
|---|-----------|-----------|-----------|
| H | -1.269555 | 4.194513  | 0.472029  |
| H | 1.549593  | 4.082340  | -0.051644 |
| H | -1.549593 | -4.082340 | -0.051644 |
| H | 1.269555  | -4.194513 | 0.472029  |

62

4,Ni-H+CO2 el energy= -1154.90458105

|    |           |           |           |
|----|-----------|-----------|-----------|
| Ni | -0.001519 | -0.110716 | -0.014124 |
| P  | -2.146026 | 0.077791  | -0.241310 |
| P  | 2.142723  | 0.067535  | 0.227284  |
| C  | -2.600198 | -1.114814 | 2.246723  |
| C  | -0.000195 | 1.853248  | -0.000238 |
| C  | 1.129288  | 2.583868  | 0.444802  |
| C  | 2.332976  | 1.794506  | 0.926240  |
| C  | -2.273877 | -1.180522 | -2.702712 |
| C  | -3.561410 | -2.322984 | -0.853236 |
| C  | -2.333246 | 1.809568  | -0.928222 |
| C  | 3.112677  | -0.991041 | 1.433418  |
| C  | 3.574092  | -2.328269 | 0.843374  |
| C  | 2.237474  | -1.214954 | 2.677008  |
| C  | 3.087172  | 0.066609  | -1.396118 |
| C  | 2.871675  | 1.380699  | -2.162674 |
| C  | -3.078578 | 0.069255  | 1.389591  |
| C  | -2.875712 | 1.385812  | 2.155318  |
| C  | -3.127904 | -0.975450 | -1.441428 |
| C  | 0.005215  | 4.686266  | 0.009200  |
| C  | 2.628226  | -1.123320 | -2.255881 |
| C  | 1.131548  | 3.983754  | 0.444867  |
| C  | -1.126868 | 2.591207  | -0.440469 |
| C  | -1.123789 | 3.991059  | -0.431169 |
| H  | -4.251954 | -2.203859 | -0.010691 |
| H  | 4.000432  | -0.402817 | 1.714040  |
| H  | 4.156301  | -0.037795 | -1.155106 |
| H  | -4.147780 | -0.048454 | 1.155170  |
| H  | 3.292961  | 2.257083  | 0.658215  |
| H  | 2.327359  | 1.695911  | 2.021509  |
| H  | -2.327359 | 1.718971  | -2.024091 |
| H  | -3.291718 | 2.273219  | -0.656947 |
| H  | 2.724456  | -2.914466 | 0.477174  |
| H  | 4.083310  | -2.919104 | 1.616733  |
| H  | 1.336304  | -1.778773 | 2.406618  |
| H  | 2.790704  | -1.782664 | 3.437223  |
| H  | 1.913622  | -0.271247 | 3.133000  |
| H  | 1.565918  | -1.014128 | -2.504731 |
| H  | 3.203696  | -1.154764 | -3.191204 |



|   |           |           |           |
|---|-----------|-----------|-----------|
| H | 3.256781  | 2.252675  | -1.624191 |
| H | 1.805479  | 1.552260  | -2.348956 |
| H | 3.385943  | 1.327987  | -3.131644 |
| H | -3.382909 | 1.325357  | 3.127571  |
| H | -1.810926 | 1.572257  | 2.334966  |
| H | -2.701940 | -2.078773 | 1.741498  |
| H | -3.170738 | -1.153979 | 3.184802  |
| H | -1.538321 | -0.991607 | 2.490983  |
| H | -1.361092 | -1.734766 | -2.452099 |
| H | -1.971009 | -0.230297 | -3.159433 |
| H | -4.074795 | -2.916123 | -1.621987 |
| H | -2.696968 | -2.898583 | -0.504887 |
| H | -0.002560 | -1.650795 | -0.035961 |
| H | -2.834336 | -1.751000 | -3.455510 |
| H | 4.277151  | -2.193193 | 0.013630  |
| H | -3.276921 | 2.252605  | 1.620217  |
| H | 2.741266  | -2.086026 | -1.750190 |
| H | -4.027312 | -0.394744 | -1.699850 |
| H | 2.008892  | 4.530997  | 0.789555  |
| H | 0.007351  | 5.774665  | 0.012772  |
| H | -1.998873 | 4.543930  | -0.772591 |
| C | -0.004505 | -4.100129 | 0.076141  |
| O | -0.866512 | -4.107821 | 0.862783  |
| O | 0.857496  | -4.176086 | -0.706825 |

62

4,Ni-(H)-formate el energy= -1154.89952994

|    |           |           |           |
|----|-----------|-----------|-----------|
| Ni | -0.000078 | -0.177776 | -0.000295 |
| P  | -2.167233 | 0.007665  | -0.245441 |
| P  | 2.167234  | 0.005289  | 0.245196  |
| C  | -2.513298 | -0.965766 | 2.335447  |
| C  | 0.000874  | 1.754116  | 0.000275  |
| C  | 1.105897  | 2.477845  | 0.507851  |
| C  | 2.286434  | 1.689137  | 1.040750  |
| C  | -2.256254 | -1.452615 | -2.603699 |
| C  | -3.592149 | -2.422379 | -0.679178 |
| C  | -2.284821 | 1.692057  | -1.040076 |
| C  | 3.124109  | -1.139823 | 1.374695  |
| C  | 3.589399  | -2.426498 | 0.678254  |
| C  | 2.253797  | -1.456274 | 2.602756  |
| C  | 3.095187  | 0.091472  | -1.382938 |
| C  | 3.024934  | 1.485113  | -2.023026 |
| C  | -3.094535 | 0.093999  | 1.383074  |
| C  | -3.022942 | 1.487295  | 2.023750  |
| C  | -3.125760 | -1.135847 | -1.375148 |

|   |           |           |           |
|---|-----------|-----------|-----------|
| C | 0.002285  | 4.575953  | 0.001141  |
| C | 2.513412  | -0.967384 | -2.335987 |
| C | 1.102923  | 3.877626  | 0.502777  |
| C | -1.103437 | 2.479262  | -0.506827 |
| C | -1.099059 | 3.879034  | -0.500903 |
| H | -4.285235 | -2.217223 | 0.144829  |
| H | 4.009849  | -0.568309 | 1.695022  |
| H | 4.145817  | -0.145502 | -1.159779 |
| H | -4.145440 | -0.142012 | 1.160194  |
| H | 3.251238  | 2.181603  | 0.863305  |
| H | 2.201607  | 1.533082  | 2.125549  |
| H | -2.200254 | 1.536509  | -2.124968 |
| H | -3.249107 | 2.185404  | -0.862261 |
| H | 2.745446  | -2.997313 | 0.277518  |
| H | 4.114459  | -3.062104 | 1.403276  |
| H | 1.376077  | -2.047258 | 2.316711  |
| H | 2.832394  | -2.038025 | 3.332158  |
| H | 1.899115  | -0.548357 | 3.107062  |
| H | 1.502400  | -0.671351 | -2.643441 |
| H | 3.136005  | -1.043055 | -3.237556 |
| H | 3.505896  | 2.256491  | -1.411848 |
| H | 1.985947  | 1.789646  | -2.190650 |
| H | 3.533791  | 1.462464  | -2.995733 |
| H | -3.531586 | 1.464645  | 2.996569  |
| H | -1.983661 | 1.790880  | 2.191255  |
| H | -2.424485 | -1.957621 | 1.884159  |
| H | -3.135693 | -1.041416 | 3.237154  |
| H | -1.501981 | -0.670629 | 2.642768  |
| H | -1.379025 | -2.044630 | -2.318271 |
| H | -1.900843 | -0.544826 | -3.107720 |
| H | -4.118192 | -3.057039 | -1.404315 |
| H | -2.748644 | -2.994306 | -0.279086 |
| H | -0.000842 | -1.782367 | -0.000698 |
| H | -2.835730 | -2.033436 | -3.333143 |
| H | 4.283043  | -2.221657 | -0.145363 |
| H | -3.503406 | 2.259345  | 1.413026  |
| H | 2.423738  | -1.959392 | -1.885215 |
| H | -4.011005 | -0.563218 | -1.694851 |
| H | 1.960051  | 4.425502  | 0.892437  |
| H | 0.002832  | 5.663993  | 0.001468  |
| H | -1.955649 | 4.428007  | -0.890205 |
| C | -0.001603 | -3.106677 | -0.001203 |
| O | -0.677669 | -3.493117 | 0.929048  |
| O | 0.674064  | -3.493207 | -0.931696 |

62

4,Ni-(O)-formate-isomer el energy= -1154.92624289

|    |           |           |           |
|----|-----------|-----------|-----------|
| Ni | 0.009868  | -0.236002 | -0.053286 |
| P  | 2.089542  | 0.502173  | 0.229537  |
| P  | -2.167433 | -0.551729 | -0.208093 |
| C  | 3.049683  | -0.476993 | -2.209437 |
| C  | -0.471478 | 1.645079  | -0.080032 |
| C  | -1.735189 | 2.078181  | -0.556054 |
| C  | -2.729792 | 1.028209  | -1.012416 |
| C  | 2.287928  | -0.807326 | 2.654769  |
| C  | 4.047998  | -1.466608 | 0.962697  |
| C  | 1.763824  | 2.191559  | 0.941157  |
| C  | -2.928098 | -1.944193 | -1.195427 |
| C  | -2.737671 | -3.296183 | -0.490523 |
| C  | -2.324213 | -1.969205 | -2.607701 |
| C  | -2.964123 | -0.639512 | 1.492616  |
| C  | -3.223567 | 0.748409  | 2.094916  |
| C  | 3.103967  | 0.777472  | -1.322053 |
| C  | 2.601106  | 2.000160  | -2.104305 |
| C  | 3.187120  | -0.318843 | 1.506152  |
| C  | -1.158555 | 4.396083  | -0.139772 |
| C  | -2.054923 | -1.462683 | 2.422636  |
| C  | -2.070011 | 3.436857  | -0.583163 |
| C  | 0.427665  | 2.637634  | 0.385689  |
| C  | 0.086397  | 3.994625  | 0.346794  |
| H  | 4.725791  | -1.133086 | 0.167786  |
| H  | -4.004616 | -1.720915 | -1.267140 |
| H  | -3.926202 | -1.157673 | 1.363151  |
| H  | 4.140109  | 0.956465  | -0.996757 |
| H  | -3.769444 | 1.291608  | -0.779100 |
| H  | -2.674301 | 0.875607  | -2.098707 |
| H  | 1.711209  | 2.066658  | 2.032076  |
| H  | 2.575162  | 2.903983  | 0.742473  |
| H  | -1.677687 | -3.481790 | -0.288649 |
| H  | -3.115773 | -4.104319 | -1.130104 |
| H  | -1.244064 | -2.149467 | -2.562847 |
| H  | -2.777289 | -2.778855 | -3.194302 |
| H  | -2.490055 | -1.032140 | -3.151883 |
| H  | -1.120382 | -0.920162 | 2.608944  |
| H  | -2.555526 | -1.628703 | 3.385886  |
| H  | -3.932473 | 1.338480  | 1.504109  |
| H  | -2.294367 | 1.322975  | 2.175438  |
| H  | -3.642223 | 0.634010  | 3.103531  |
| H  | 3.174808  | 2.099728  | -3.035195 |
| H  | 1.542821  | 1.887648  | -2.367771 |

|   |           |           |           |
|---|-----------|-----------|-----------|
| H | 3.331881  | -1.393782 | -1.684768 |
| H | 3.719765  | -0.354082 | -3.070658 |
| H | 2.031429  | -0.619047 | -2.592477 |
| H | 1.626159  | -1.598870 | 2.287536  |
| H | 1.668026  | -0.002432 | 3.071973  |
| H | 4.669765  | -1.861082 | 1.777814  |
| H | 3.432208  | -2.289782 | 0.582913  |
| H | 2.905184  | -1.208525 | 3.469377  |
| H | -3.281501 | -3.344000 | 0.459502  |
| H | 2.705714  | 2.934729  | -1.543561 |
| H | -1.777983 | -2.433155 | 2.001284  |
| H | 3.849889  | 0.483279  | 1.869528  |
| H | -3.047469 | 3.746568  | -0.951199 |
| H | -1.420197 | 5.451812  | -0.166499 |
| H | 0.795225  | 4.740990  | 0.703624  |
| O | 0.504098  | -2.107792 | 0.138767  |
| O | 1.979617  | -3.642820 | -0.576652 |
| C | 1.086117  | -2.829317 | -0.766019 |
| H | 0.706891  | -2.673199 | -1.806838 |

62

4, Ni-(O)-formate el energy= -1154.93588671

|    |           |           |           |
|----|-----------|-----------|-----------|
| Ni | -0.014431 | -0.288663 | 0.159327  |
| P  | 2.097558  | 0.431257  | 0.234171  |
| P  | -2.176785 | -0.554201 | -0.169373 |
| C  | 2.896153  | -0.325361 | -2.374158 |
| C  | -0.422625 | 1.600813  | -0.004078 |
| C  | -1.650388 | 2.056851  | -0.544404 |
| C  | -2.623480 | 1.017719  | -1.063224 |
| C  | 2.701625  | -0.873890 | 2.608186  |
| C  | 4.167418  | -1.498532 | 0.629873  |
| C  | 1.803515  | 2.085723  | 1.047367  |
| C  | -2.762454 | -1.933934 | -1.288755 |
| C  | -2.849396 | -3.286308 | -0.568402 |
| C  | -1.822300 | -2.013812 | -2.504501 |
| C  | -3.218227 | -0.601039 | 1.390511  |
| C  | -3.378263 | 0.801229  | 1.997880  |
| C  | 2.952717  | 0.851645  | -1.388903 |
| C  | 2.361739  | 2.107088  | -2.049105 |
| C  | 3.390642  | -0.373428 | 1.327477  |
| C  | -1.057657 | 4.359495  | -0.070831 |
| C  | -2.568873 | -1.545633 | 2.416485  |
| C  | -1.960251 | 3.421215  | -0.575464 |
| C  | 0.476574  | 2.570850  | 0.501391  |
| C  | 0.158299  | 3.933596  | 0.466435  |

|   |           |           |           |
|---|-----------|-----------|-----------|
| H | 4.783325  | -1.117008 | -0.192243 |
| H | -3.770468 | -1.643787 | -1.626063 |
| H | -4.209765 | -0.985413 | 1.105594  |
| H | 4.000893  | 1.057064  | -1.118836 |
| H | -3.674904 | 1.305234  | -0.933655 |
| H | -2.471549 | 0.831157  | -2.135172 |
| H | 1.748895  | 1.907061  | 2.130066  |
| H | 2.623435  | 2.797167  | 0.879552  |
| H | -1.887369 | -3.548942 | -0.117106 |
| H | -3.115711 | -4.070795 | -1.288793 |
| H | -0.802532 | -2.276767 | -2.200688 |
| H | -2.183725 | -2.781274 | -3.201905 |
| H | -1.775105 | -1.065683 | -3.054234 |
| H | -1.583383 | -1.165623 | 2.708445  |
| H | -3.199160 | -1.607068 | 3.313843  |
| H | -3.908481 | 1.492765  | 1.335123  |
| H | -2.401455 | 1.242564  | 2.226351  |
| H | -3.947369 | 0.729275  | 2.934135  |
| H | 2.894937  | 2.299221  | -2.989705 |
| H | 1.300998  | 1.965485  | -2.282978 |
| H | 3.302757  | -1.251746 | -1.966570 |
| H | 3.455315  | -0.062750 | -3.282843 |
| H | 1.859297  | -0.541520 | -2.650259 |
| H | 1.953907  | -1.637279 | 2.368851  |
| H | 2.190397  | -0.064493 | 3.144506  |
| H | 4.839994  | -1.981209 | 1.351555  |
| H | 3.496680  | -2.260642 | 0.220994  |
| H | 3.445540  | -1.306072 | 3.290715  |
| H | -3.611906 | -3.285422 | 0.218787  |
| H | 2.446845  | 3.002352  | -1.425698 |
| H | -2.416967 | -2.556415 | 2.030320  |
| H | 4.098021  | 0.430136  | 1.588169  |
| H | -2.910765 | 3.752546  | -0.992181 |
| H | -1.301671 | 5.419535  | -0.096217 |
| H | 0.864437  | 4.665296  | 0.857508  |
| O | 0.219427  | -2.161060 | 0.692042  |
| O | 1.413947  | -2.747466 | -1.132506 |
| C | 0.892061  | -2.975843 | -0.041555 |
| H | 0.980424  | -3.988549 | 0.414032  |

62

4, TS-2-3 el energy= -1154.89890440

|    |           |           |           |
|----|-----------|-----------|-----------|
| Ni | -0.000164 | -0.177918 | -0.000294 |
| P  | 2.166377  | 0.008123  | 0.137315  |
| P  | -2.166354 | 0.011913  | -0.137439 |

|   |           |           |           |
|---|-----------|-----------|-----------|
| C | 2.471572  | -1.049330 | -2.424401 |
| C | 0.001406  | 1.769341  | 0.001176  |
| C | -1.131826 | 2.499239  | -0.431833 |
| C | -2.344053 | 1.712158  | -0.892678 |
| C | 2.372460  | -1.398942 | 2.516566  |
| C | 3.634011  | -2.403621 | 0.563603  |
| C | 2.346908  | 1.707183  | 0.894593  |
| C | -3.189011 | -1.097595 | -1.247295 |
| C | -3.637386 | -2.397229 | -0.566161 |
| C | -2.375303 | -1.391879 | -2.518379 |
| C | -3.024735 | 0.076561  | 1.530347  |
| C | -2.839335 | 1.437996  | 2.216523  |
| C | 3.025016  | 0.073267  | -1.530313 |
| C | 2.841252  | 1.435619  | -2.215119 |
| C | 3.187060  | -1.104244 | 1.246148  |
| C | 0.003709  | 4.595884  | 0.003014  |
| C | -2.472610 | -1.047616 | 2.423272  |
| C | -1.128293 | 3.899006  | -0.426254 |
| C | 1.135856  | 2.496816  | 0.435045  |
| C | 1.134591  | 3.896596  | 0.431318  |
| H | 4.292825  | -2.214844 | -0.291684 |
| H | -4.082936 | -0.512663 | -1.515732 |
| H | -4.097098 | -0.087370 | 1.345340  |
| H | 4.097171  | -0.092130 | -1.345394 |
| H | -3.297383 | 2.194880  | -0.639345 |
| H | -2.336785 | 1.576372  | -1.983695 |
| H | 2.339757  | 1.570069  | 1.985447  |
| H | 3.300940  | 2.188682  | 0.641570  |
| H | -2.782165 | -2.982980 | -0.213435 |
| H | -4.194594 | -3.013691 | -1.283884 |
| H | -1.481904 | -1.979290 | -2.276395 |
| H | -2.981848 | -1.965958 | -3.231218 |
| H | -2.045976 | -0.474668 | -3.022668 |
| H | -1.416430 | -0.858176 | 2.650556  |
| H | -3.028144 | -1.080426 | 3.370270  |
| H | -3.289602 | 2.261587  | 1.652483  |
| H | -1.776528 | 1.668237  | 2.350066  |
| H | -3.310657 | 1.411923  | 3.207979  |
| H | 3.312428  | 1.409952  | -3.206654 |
| H | 1.778717  | 1.667318  | -2.348307 |
| H | 2.519964  | -2.036949 | -1.959387 |
| H | 3.026681  | -1.081389 | -3.371675 |
| H | 1.415446  | -0.858767 | -2.650986 |
| H | 1.478506  | -1.985090 | 2.273600  |
| H | 2.043947  | -0.481875 | 3.021652  |

|   |           |           |           |
|---|-----------|-----------|-----------|
| H | 4.190120  | -3.021694 | 1.280793  |
| H | 2.778173  | -2.987830 | 0.209810  |
| H | -0.001592 | -1.746933 | -0.002011 |
| H | 2.978050  | -1.974433 | 3.229079  |
| H | -4.295600 | -2.208658 | 0.289633  |
| H | 3.292602  | 2.258084  | -1.650300 |
| H | -2.521597 | -2.034611 | 1.956981  |
| H | 4.081657  | -0.520847 | 1.515682  |
| H | -2.007638 | 4.449139  | -0.759911 |
| H | 0.004594  | 5.684071  | 0.003738  |
| H | 2.014852  | 4.444858  | 0.765638  |
| C | -0.002468 | -3.324287 | -0.002514 |
| O | 0.622119  | -3.610889 | -0.977506 |
| O | -0.627367 | -3.610982 | 0.972256  |

62

4, TS-3-4i      el energy= -1154.89652029

|    |           |           |           |
|----|-----------|-----------|-----------|
| Ni | 0.080721  | -0.002373 | 0.077286  |
| P  | 0.042985  | -2.199589 | -0.111344 |
| P  | -0.067342 | 2.204683  | -0.135268 |
| C  | -2.629937 | -2.342781 | 0.775212  |
| C  | -0.043493 | -0.033288 | -1.844319 |
| C  | -0.465568 | 1.101578  | -2.575042 |
| C  | -0.889207 | 2.329415  | -1.802182 |
| C  | 2.398175  | -2.784584 | 1.284142  |
| C  | 0.240466  | -3.557644 | 2.365315  |
| C  | 0.841305  | -2.387694 | -1.780819 |
| C  | -1.152381 | 3.277528  | 0.955641  |
| C  | -0.463579 | 3.801835  | 2.222261  |
| C  | -2.440957 | 2.508245  | 1.292550  |
| C  | 1.599010  | 3.047906  | -0.268684 |
| C  | 2.244139  | 2.833836  | -1.645327 |
| C  | -1.677511 | -2.944443 | -0.270646 |
| C  | -2.271434 | -2.775336 | -1.676867 |
| C  | 0.984612  | -3.334152 | 1.039808  |
| C  | -0.042851 | -0.047450 | -4.669308 |
| C  | 2.513803  | 2.508920  | 0.845640  |
| C  | -0.463135 | 1.088124  | -3.974638 |
| C  | 0.389786  | -1.172336 | -2.565025 |
| C  | 0.383720  | -1.173994 | -3.964791 |
| H  | -0.700043 | -4.100202 | 2.219135  |
| H  | -1.401437 | 4.136674  | 0.310775  |
| H  | 1.421878  | 4.123020  | -0.117562 |
| H  | -1.544790 | -4.019433 | -0.072599 |
| H  | -0.652298 | 3.267444  | -2.320513 |

|   |           |           |           |
|---|-----------|-----------|-----------|
| H | -1.972597 | 2.329117  | -1.618948 |
| H | 1.928393  | -2.374567 | -1.624485 |
| H | 0.597298  | -3.336035 | -2.276510 |
| H | -0.164333 | 2.983117  | 2.883835  |
| H | -1.165585 | 4.446876  | 2.767240  |
| H | -2.220633 | 1.632318  | 1.912378  |
| H | -3.127695 | 3.163447  | 1.844396  |
| H | -2.965644 | 2.162878  | 0.392326  |
| H | 2.792683  | 1.471010  | 0.622845  |
| H | 3.433681  | 3.106285  | 0.896466  |
| H | 1.662331  | 3.279258  | -2.459621 |
| H | 2.360118  | 1.765855  | -1.862713 |
| H | 3.241727  | 3.292420  | -1.654946 |
| H | -3.269444 | -3.232489 | -1.698244 |
| H | -2.378789 | -1.716621 | -1.935255 |
| H | -2.239510 | -2.387991 | 1.792951  |
| H | -3.591851 | -2.871698 | 0.736251  |
| H | -2.806441 | -1.283471 | 0.559663  |
| H | 2.358424  | -1.837975 | 1.834757  |
| H | 2.949128  | -2.610287 | 0.352000  |
| H | 0.866815  | -4.153821 | 3.041569  |
| H | 0.008467  | -2.605877 | 2.854739  |
| H | 2.975638  | -3.500690 | 1.882941  |
| H | 0.423397  | 4.402975  | 1.989501  |
| H | -1.669365 | -3.251892 | -2.457298 |
| H | 2.042225  | 2.499557  | 1.832644  |
| H | 1.061589  | -4.293860 | 0.503717  |
| H | -0.787526 | 1.971066  | -4.523689 |
| H | -0.044164 | -0.052722 | -5.757164 |
| H | 0.714870  | -2.059670 | -4.505364 |
| O | -0.987081 | -0.305488 | 2.503142  |
| O | 0.722338  | 0.978159  | 3.315976  |
| C | 0.136064  | 0.222738  | 2.550492  |
| H | 0.865832  | -0.104829 | 1.622579  |

62

4,TS-4i-4 el energy= -1154.92511976

|    |           |           |           |
|----|-----------|-----------|-----------|
| Ni | -0.045763 | 0.100843  | 0.062921  |
| P  | 0.011060  | -2.136249 | -0.079792 |
| P  | -0.021124 | 2.284246  | -0.223483 |
| C  | -2.502287 | -2.564674 | 1.052394  |
| C  | -0.023189 | 0.055133  | -1.875951 |
| C  | -0.388077 | 1.189028  | -2.646275 |
| C  | -0.766156 | 2.462885  | -1.916616 |
| C  | 2.304263  | -2.315458 | 1.463139  |



|   |           |           |           |
|---|-----------|-----------|-----------|
| C | 0.476287  | -3.930412 | 2.148059  |
| C | 0.766752  | -2.326845 | -1.771393 |
| C | -1.027525 | 3.391314  | 0.896091  |
| C | -0.335865 | 3.641806  | 2.243648  |
| C | -2.410658 | 2.754713  | 1.105044  |
| C | 1.713090  | 2.997957  | -0.291937 |
| C | 2.371935  | 2.777281  | -1.661404 |
| C | -1.662446 | -2.973015 | -0.169028 |
| C | -2.398849 | -2.613083 | -1.467712 |
| C | 1.145059  | -3.201149 | 0.976855  |
| C | -0.022775 | -0.027915 | -4.711703 |
| C | 2.563366  | 2.352466  | 0.816572  |
| C | -0.384851 | 1.143211  | -4.045230 |
| C | 0.354689  | -1.116335 | -2.576896 |
| C | 0.347375  | -1.154593 | -3.976045 |
| H | -0.349853 | -4.573204 | 1.820788  |
| H | -1.141113 | 4.347840  | 0.361270  |
| H | 1.621609  | 4.079107  | -0.107688 |
| H | -1.480621 | -4.057834 | -0.147105 |
| H | -0.445775 | 3.371763  | -2.442052 |
| H | -1.854353 | 2.537089  | -1.783852 |
| H | 1.855841  | -2.345855 | -1.619093 |
| H | 0.495580  | -3.278102 | -2.249215 |
| H | -0.131908 | 2.690925  | 2.746124  |
| H | -0.991281 | 4.242997  | 2.887603  |
| H | -2.304341 | 1.792053  | 1.616778  |
| H | -3.036504 | 3.409357  | 1.725470  |
| H | -2.942099 | 2.582952  | 0.161154  |
| H | 2.692062  | 1.282276  | 0.615941  |
| H | 3.555956  | 2.821335  | 0.846529  |
| H | 1.842129  | 3.288121  | -2.472455 |
| H | 2.414845  | 1.710889  | -1.909438 |
| H | 3.399597  | 3.163073  | -1.636545 |
| H | -3.391512 | -3.082784 | -1.467285 |
| H | -2.534757 | -1.528661 | -1.552918 |
| H | -1.995855 | -2.753592 | 2.003002  |
| H | -3.454246 | -3.112027 | 1.053789  |
| H | -2.728732 | -1.491888 | 1.007768  |
| H | 1.926608  | -1.574995 | 2.175571  |
| H | 2.791275  | -1.781913 | 0.635258  |
| H | 1.220638  | -4.575173 | 2.634827  |
| H | 0.112389  | -3.216755 | 2.892184  |
| H | 3.065305  | -2.932252 | 1.959563  |
| H | 0.607074  | 4.188268  | 2.129095  |
| H | -1.866310 | -2.949371 | -2.363403 |

|   |           |           |           |
|---|-----------|-----------|-----------|
| H | 2.108919  | 2.436613  | 1.807214  |
| H | 1.529183  | -3.954514 | 0.270580  |
| H | -0.666930 | 2.027340  | -4.615811 |
| H | -0.024657 | -0.061112 | -5.799181 |
| H | 0.636090  | -2.069099 | -4.492911 |
| O | -0.006835 | 0.296503  | 1.993233  |
| O | -0.251476 | -1.196768 | 3.662407  |
| C | -0.668209 | -0.318051 | 2.919143  |
| H | -1.721040 | 0.040300  | 3.046404  |

77

5, Ni-H el energy= -1127.20989380

|    |           |          |           |
|----|-----------|----------|-----------|
| Ni | 7.585196  | 5.743055 | 0.795373  |
| P  | 5.682730  | 6.489004 | 0.062163  |
| H  | 6.964971  | 5.170026 | 2.100308  |
| C  | 8.414801  | 6.652031 | -0.774069 |
| H  | 8.640212  | 7.629708 | -0.293309 |
| P  | 9.573529  | 5.004652 | 1.258927  |
| C  | 7.484462  | 6.934977 | -1.968154 |
| H  | 7.305002  | 5.978448 | -2.481497 |
| C  | 8.145753  | 7.878762 | -2.989044 |
| H  | 7.486584  | 8.047351 | -3.854671 |
| H  | 8.299241  | 8.860305 | -2.511874 |
| C  | 9.497988  | 7.324177 | -3.462587 |
| H  | 9.980038  | 8.032589 | -4.150783 |
| H  | 9.323153  | 6.401974 | -4.039000 |
| C  | 10.432888 | 7.005657 | -2.285801 |
| H  | 10.706350 | 7.941362 | -1.771640 |
| H  | 11.369724 | 6.565178 | -2.660696 |
| C  | 9.750900  | 6.069750 | -1.271295 |
| H  | 9.526540  | 5.130322 | -1.798392 |
| C  | 6.134977  | 7.472586 | -1.468689 |
| H  | 5.351874  | 7.468665 | -2.238196 |
| H  | 6.262693  | 8.515353 | -1.149718 |
| C  | 10.660908 | 5.744990 | -0.077136 |
| H  | 11.066899 | 6.681707 | 0.326762  |
| H  | 11.519421 | 5.113834 | -0.341698 |
| C  | 4.493789  | 5.124431 | -0.528206 |
| C  | 5.199584  | 4.419376 | -1.704365 |
| H  | 5.276085  | 5.063141 | -2.587255 |
| H  | 4.622695  | 3.528639 | -1.989816 |
| H  | 6.209929  | 4.096393 | -1.425699 |
| C  | 3.127911  | 5.644276 | -0.999656 |
| H  | 3.224745  | 6.430767 | -1.758373 |
| H  | 2.532652  | 6.038893 | -0.169668 |

|   |            |           |            |
|---|------------|-----------|------------|
| H | 2. 555932  | 4. 819677 | -1. 449337 |
| C | 4. 312071  | 4. 090182 | 0. 598334  |
| H | 5. 282492  | 3. 731930 | 0. 956536  |
| H | 3. 734478  | 3. 236021 | 0. 216346  |
| H | 3. 774359  | 4. 499094 | 1. 458160  |
| C | 4. 816318  | 7. 748354 | 1. 194883  |
| C | 5. 968802  | 8. 587408 | 1. 786425  |
| H | 6. 548258  | 9. 104162 | 1. 011533  |
| H | 6. 656962  | 7. 950696 | 2. 352878  |
| H | 5. 558267  | 9. 351057 | 2. 462470  |
| C | 3. 834339  | 8. 678750 | 0. 463351  |
| H | 4. 318096  | 9. 228707 | -0. 351779 |
| H | 3. 441675  | 9. 421908 | 1. 172320  |
| H | 2. 979858  | 8. 138550 | 0. 046027  |
| C | 4. 104402  | 7. 028063 | 2. 351111  |
| H | 3. 197631  | 6. 511927 | 2. 016496  |
| H | 3. 801285  | 7. 764751 | 3. 108812  |
| H | 4. 768630  | 6. 298072 | 2. 827710  |
| C | 10. 317763 | 5. 650517 | 2. 886418  |
| C | 11. 854726 | 5. 619268 | 2. 929600  |
| H | 12. 301277 | 6. 182607 | 2. 102459  |
| H | 12. 252418 | 4. 600950 | 2. 898424  |
| H | 12. 201150 | 6. 081180 | 3. 865405  |
| C | 9. 737001  | 4. 881216 | 4. 083667  |
| H | 8. 644446  | 4. 821961 | 4. 020103  |
| H | 10. 000533 | 5. 402356 | 5. 015157  |
| H | 10. 140483 | 3. 864841 | 4. 152846  |
| C | 9. 835095  | 7. 113911 | 2. 973808  |
| H | 10. 182557 | 7. 718514 | 2. 127059  |
| H | 10. 221395 | 7. 574133 | 3. 894515  |
| H | 8. 740757  | 7. 157772 | 2. 992028  |
| C | 9. 754890  | 3. 117041 | 1. 090994  |
| C | 8. 671205  | 2. 427505 | 1. 940649  |
| H | 8. 825646  | 2. 573254 | 3. 013289  |
| H | 8. 689230  | 1. 346013 | 1. 742733  |
| H | 7. 678481  | 2. 817837 | 1. 694692  |
| C | 9. 471439  | 2. 788701 | -0. 389037 |
| H | 10. 258399 | 3. 160943 | -1. 053789 |
| H | 8. 515410  | 3. 216028 | -0. 714895 |
| H | 9. 418145  | 1. 698060 | -0. 512973 |
| C | 11. 145405 | 2. 585066 | 1. 467167  |
| H | 11. 341414 | 2. 677976 | 2. 540427  |
| H | 11. 946347 | 3. 102706 | 0. 924824  |
| H | 11. 211309 | 1. 516956 | 1. 213908  |

76

5,Ni+ el energy= -1126.43952841

|    |           |           |           |
|----|-----------|-----------|-----------|
| Ni | 0.000053  | 0.110206  | 0.042509  |
| P  | 2.242244  | 0.163659  | 0.021942  |
| C  | 0.000037  | 1.981373  | -0.455549 |
| H  | -0.000001 | 1.828958  | -1.550366 |
| P  | -2.242138 | 0.163661  | 0.022019  |
| C  | 1.265394  | 2.729665  | -0.016127 |
| H  | 1.226750  | 2.833759  | 1.076331  |
| C  | 1.265136  | 4.152813  | -0.615495 |
| H  | 2.163121  | 4.690176  | -0.281341 |
| H  | 1.331781  | 4.074698  | -1.711576 |
| C  | 0.000053  | 4.925743  | -0.226724 |
| H  | 0.000037  | 5.913778  | -0.703248 |
| H  | 0.000094  | 5.102239  | 0.859127  |
| C  | -1.265064 | 4.152821  | -0.615401 |
| H  | -1.331790 | 4.074709  | -1.711479 |
| H  | -2.163021 | 4.690188  | -0.281181 |
| C  | -1.265289 | 2.729668  | -0.016041 |
| H  | -1.226577 | 2.833753  | 1.076415  |
| C  | 2.535217  | 1.951997  | -0.389412 |
| H  | 3.431174  | 2.353384  | 0.097528  |
| H  | 2.701560  | 2.016941  | -1.471281 |
| C  | -2.535140 | 1.952012  | -0.389255 |
| H  | -2.701566 | 2.016991  | -1.471109 |
| H  | -3.431061 | 2.353383  | 0.097765  |
| C  | 2.970299  | -0.178132 | 1.738515  |
| C  | 2.477827  | 0.957552  | 2.658208  |
| H  | 2.920588  | 1.925247  | 2.398915  |
| H  | 2.766670  | 0.729652  | 3.692278  |
| H  | 1.385015  | 1.055969  | 2.631320  |
| C  | 4.504974  | -0.228082 | 1.761867  |
| H  | 4.953541  | 0.677168  | 1.335340  |
| H  | 4.897326  | -1.095477 | 1.221951  |
| H  | 4.849348  | -0.307380 | 2.801669  |
| C  | 2.376071  | -1.503288 | 2.256164  |
| H  | 1.278164  | -1.467409 | 2.271974  |
| H  | 2.714593  | -1.675886 | 3.286096  |
| H  | 2.680490  | -2.367333 | 1.659562  |
| C  | 3.065373  | -0.827929 | -1.370307 |
| C  | 2.164738  | -0.623556 | -2.607174 |
| H  | 2.073049  | 0.430892  | -2.893106 |
| H  | 1.155108  | -1.016533 | -2.439019 |
| H  | 2.597794  | -1.158365 | -3.462359 |
| C  | 4.487711  | -0.334725 | -1.689031 |

|   |           |           |           |
|---|-----------|-----------|-----------|
| H | 4.505511  | 0.726236  | -1.962603 |
| H | 4.878251  | -0.898678 | -2.546594 |
| H | 5.178597  | -0.483452 | -0.855371 |
| C | 3.085009  | -2.325324 | -1.019919 |
| H | 3.787116  | -2.552424 | -0.211627 |
| H | 3.403390  | -2.898707 | -1.900159 |
| H | 2.091741  | -2.692275 | -0.729619 |
| C | -3.065346 | -0.827882 | -1.370211 |
| C | -4.487759 | -0.334765 | -1.688729 |
| H | -4.505672 | 0.726212  | -1.962231 |
| H | -5.178528 | -0.483597 | -0.854989 |
| H | -4.878364 | -0.898693 | -2.546278 |
| C | -3.084829 | -2.325302 | -1.019916 |
| H | -2.091492 | -2.692209 | -0.729798 |
| H | -3.403315 | -2.898650 | -1.900142 |
| H | -3.786792 | -2.552497 | -0.211525 |
| C | -2.164865 | -0.623354 | -2.607164 |
| H | -2.073291 | 0.431121  | -2.893034 |
| H | -2.597976 | -1.158139 | -3.462337 |
| H | -1.155185 | -1.016263 | -2.439151 |
| C | -2.970101 | -0.178198 | 1.738614  |
| C | -2.375920 | -1.503425 | 2.256133  |
| H | -2.680428 | -2.367409 | 1.659486  |
| H | -2.714388 | -1.676077 | 3.286073  |
| H | -1.278009 | -1.467614 | 2.271877  |
| C | -2.477504 | 0.957400  | 2.658348  |
| H | -2.920229 | 1.925137  | 2.399147  |
| H | -1.384688 | 1.055758  | 2.631391  |
| H | -2.766290 | 0.729449  | 3.692422  |
| C | -4.504777 | -0.228063 | 1.762051  |
| H | -4.897207 | -1.095385 | 1.222073  |
| H | -4.953317 | 0.677251  | 1.335632  |
| H | -4.849099 | -0.307439 | 2.801864  |

80

5, Ni-H+CO2 el energy= -1315.80179121

|    |           |           |           |
|----|-----------|-----------|-----------|
| Ni | -0.000130 | -0.108038 | -0.052948 |
| P  | 2.171131  | 0.041382  | 0.014348  |
| C  | -0.000092 | 1.845948  | -0.466923 |
| H  | 0.000145  | 1.766271  | -1.576451 |
| P  | -2.171395 | 0.041648  | 0.014941  |
| C  | 1.259045  | 2.634610  | -0.061989 |
| H  | 1.226260  | 2.770320  | 1.029256  |
| C  | 1.272772  | 4.040284  | -0.690585 |
| H  | 2.161800  | 4.605446  | -0.370659 |

|   |           |           |           |
|---|-----------|-----------|-----------|
| H | 1.341398  | 3.934615  | -1.785442 |
| C | -0.000088 | 4.820965  | -0.330880 |
| H | 0.000077  | 5.800625  | -0.828848 |
| H | -0.000407 | 5.023237  | 0.751890  |
| C | -1.272770 | 4.040305  | -0.691284 |
| H | -1.340812 | 3.934540  | -1.786167 |
| H | -2.161962 | 4.605497  | -0.371869 |
| C | -1.259304 | 2.634740  | -0.062484 |
| H | -1.226717 | 2.770718  | 1.028726  |
| C | 2.520631  | 1.832482  | -0.408660 |
| H | 3.430824  | 2.223611  | 0.064708  |
| H | 2.682332  | 1.874385  | -1.493679 |
| C | -2.520810 | 1.832514  | -0.409110 |
| H | -2.682281 | 1.873819  | -1.494189 |
| H | -3.431114 | 2.223874  | 0.063873  |
| C | 2.895529  | -0.236378 | 1.753501  |
| C | 2.306909  | 0.873150  | 2.648386  |
| H | 2.698219  | 1.863057  | 2.390196  |
| H | 2.573335  | 0.671645  | 3.695273  |
| H | 1.213341  | 0.905953  | 2.575114  |
| C | 4.428650  | -0.164825 | 1.810983  |
| H | 4.814934  | 0.765616  | 1.376617  |
| H | 4.897852  | -1.007060 | 1.292059  |
| H | 4.758733  | -0.201855 | 2.859293  |
| C | 2.403014  | -1.590808 | 2.297218  |
| H | 1.313389  | -1.667493 | 2.224678  |
| H | 2.697533  | -1.686113 | 3.352227  |
| H | 2.829882  | -2.439213 | 1.755503  |
| C | 3.119738  | -0.942946 | -1.308737 |
| C | 2.227246  | -0.855584 | -2.564888 |
| H | 2.065562  | 0.181494  | -2.884246 |
| H | 1.249522  | -1.310899 | -2.382562 |
| H | 2.709690  | -1.389817 | -3.395873 |
| C | 4.510798  | -0.373208 | -1.635931 |
| H | 4.458952  | 0.664018  | -1.985101 |
| H | 4.964312  | -0.967252 | -2.442465 |
| H | 5.189571  | -0.408243 | -0.778932 |
| C | 3.245127  | -2.417941 | -0.894454 |
| H | 4.011176  | -2.561663 | -0.124316 |
| H | 3.535447  | -3.021957 | -1.765512 |
| H | 2.298000  | -2.805641 | -0.507641 |
| C | -3.120342 | -0.943446 | -1.307362 |
| C | -4.511524 | -0.374052 | -1.634521 |
| H | -4.459910 | 0.663172  | -1.983736 |
| H | -5.190244 | -0.409196 | -0.777487 |

|   |           |           |           |
|---|-----------|-----------|-----------|
| H | -4.964953 | -0.968239 | -2.440995 |
| C | -3.245232 | -2.418273 | -0.892270 |
| H | -2.297746 | -2.805475 | -0.505812 |
| H | -3.535852 | -3.022810 | -1.762870 |
| H | -4.010820 | -2.561804 | -0.121653 |
| C | -2.228174 | -0.856648 | -2.563800 |
| H | -2.066858 | 0.180252  | -2.883905 |
| H | -2.710688 | -1.391570 | -3.394302 |
| H | -1.250294 | -1.311612 | -2.381434 |
| C | -2.895410 | -0.235040 | 1.754410  |
| C | -2.402055 | -1.588889 | 2.298874  |
| H | -2.828057 | -2.437879 | 1.757401  |
| H | -2.696761 | -1.683944 | 3.353853  |
| H | -1.312353 | -1.664749 | 2.226625  |
| C | -2.307269 | 0.875275  | 2.648617  |
| H | -2.699248 | 1.864819  | 2.390040  |
| H | -1.213738 | 0.908721  | 2.575156  |
| H | -2.573374 | 0.674086  | 3.695647  |
| C | -4.428548 | -0.164205 | 1.812122  |
| H | -4.897458 | -1.007078 | 1.293976  |
| H | -4.815350 | 0.765697  | 1.377057  |
| H | -4.758408 | -0.200535 | 2.860522  |
| H | 0.000043  | -1.647842 | 0.131926  |
| C | -0.000484 | -3.974826 | -1.112428 |
| O | 0.000246  | -3.556661 | -2.202461 |
| O | -0.001158 | -4.451808 | -0.048988 |

80

5,Ni-(H)-formate el energy= -1315.80091636

|    |           |           |           |
|----|-----------|-----------|-----------|
| Ni | -0.000211 | -0.126816 | -0.024059 |
| P  | 2.219368  | -0.012424 | -0.020569 |
| C  | -0.000221 | 1.790882  | -0.471105 |
| H  | -0.000766 | 1.712428  | -1.577140 |
| P  | -2.219492 | -0.011925 | -0.018349 |
| C  | 1.258718  | 2.562064  | -0.038888 |
| H  | 1.228373  | 2.657514  | 1.055710  |
| C  | 1.266721  | 3.988606  | -0.620523 |
| H  | 2.161995  | 4.532874  | -0.285040 |
| H  | 1.330421  | 3.920635  | -1.718401 |
| C  | 0.000191  | 4.759778  | -0.228149 |
| H  | 0.000065  | 5.755427  | -0.692154 |
| H  | 0.000731  | 4.922900  | 0.860837  |
| C  | -1.266882 | 3.988863  | -0.619292 |
| H  | -1.331667 | 3.920896  | -1.717107 |
| H  | -2.161713 | 4.533326  | -0.282944 |

|   |           |           |           |
|---|-----------|-----------|-----------|
| C | -1.258587 | 2.562332  | -0.037640 |
| H | -1.227110 | 2.657808  | 1.056922  |
| C | 2.517445  | 1.783249  | -0.428270 |
| H | 3.432170  | 2.180448  | 0.029032  |
| H | 2.648764  | 1.844757  | -1.515573 |
| C | -2.517905 | 1.783771  | -0.425666 |
| H | -2.650426 | 1.845305  | -1.512827 |
| H | -3.432052 | 2.181094  | 0.032677  |
| C | 2.979594  | -0.307849 | 1.694862  |
| C | 2.380052  | 0.761780  | 2.629726  |
| H | 2.736033  | 1.769928  | 2.390279  |
| H | 2.677353  | 0.540459  | 3.663823  |
| H | 1.283844  | 0.761814  | 2.586957  |
| C | 4.511307  | -0.190713 | 1.712036  |
| H | 4.858904  | 0.765478  | 1.301254  |
| H | 4.990243  | -1.000126 | 1.152231  |
| H | 4.869028  | -0.253741 | 2.749546  |
| C | 2.540239  | -1.690502 | 2.210717  |
| H | 1.452286  | -1.801827 | 2.216396  |
| H | 2.904667  | -1.819239 | 3.239786  |
| H | 2.941415  | -2.512077 | 1.612608  |
| C | 3.134737  | -0.958642 | -1.398361 |
| C | 2.173134  | -0.913624 | -2.605704 |
| H | 1.885585  | 0.111775  | -2.872183 |
| H | 1.267920  | -1.492449 | -2.396193 |
| H | 2.670359  | -1.356519 | -3.480204 |
| C | 4.475178  | -0.299117 | -1.772556 |
| H | 4.353211  | 0.730733  | -2.124543 |
| H | 4.932390  | -0.870890 | -2.592057 |
| H | 5.185133  | -0.292190 | -0.939810 |
| C | 3.380637  | -2.431234 | -1.030293 |
| H | 4.105074  | -2.540261 | -0.216553 |
| H | 3.796223  | -2.944945 | -1.908489 |
| H | 2.456059  | -2.948222 | -0.763815 |
| C | -3.136223 | -0.958207 | -1.395164 |
| C | -4.477003 | -0.298596 | -1.767951 |
| H | -4.355334 | 0.731287  | -2.119946 |
| H | -5.186090 | -0.291735 | -0.934459 |
| H | -4.935066 | -0.870271 | -2.587044 |
| C | -3.381782 | -2.430793 | -1.026859 |
| H | -2.456869 | -2.947801 | -0.761581 |
| H | -3.798435 | -2.944434 | -1.904586 |
| H | -4.105242 | -2.539878 | -0.212260 |
| C | -2.175814 | -0.913246 | -2.603458 |
| H | -1.888368 | 0.112129  | -2.870160 |



|   |           |           |           |
|---|-----------|-----------|-----------|
| H | -2.673959 | -1.356018 | -3.477498 |
| H | -1.270471 | -1.492231 | -2.394893 |
| C | -2.977799 | -0.307463 | 1.697897  |
| C | -2.538066 | -1.690204 | 2.213209  |
| H | -2.939847 | -2.511708 | 1.615408  |
| H | -2.901546 | -1.819005 | 3.242603  |
| H | -1.450101 | -1.801549 | 2.217872  |
| C | -2.377138 | 0.762037  | 2.632198  |
| H | -2.733177 | 1.770251  | 2.393123  |
| H | -1.280974 | 0.761872  | 2.588352  |
| H | -2.673463 | 0.540745  | 3.666581  |
| C | -4.509496 | -0.190134 | 1.716692  |
| H | -4.989110 | -0.999427 | 1.157286  |
| H | -4.857401 | 0.766139  | 1.306364  |
| H | -4.866137 | -0.253227 | 2.754568  |
| H | -0.002216 | -1.725087 | 0.310078  |
| C | 0.000140  | -2.972536 | 0.046457  |
| O | -0.000565 | -3.171236 | -1.162114 |
| O | 0.001996  | -3.585986 | 1.096514  |

80

5, Ni-(O)-formate-isomer el energy= -1315.82514537

|    |           |           |           |
|----|-----------|-----------|-----------|
| Ni | -0.026785 | -0.182035 | -0.067278 |
| P  | 2.202496  | 0.083187  | -0.033269 |
| C  | -0.116713 | 1.765150  | -0.388084 |
| H  | -0.096593 | 1.705907  | -1.497566 |
| P  | -2.254755 | -0.119448 | -0.049361 |
| C  | 1.101903  | 2.595963  | 0.057170  |
| H  | 1.082420  | 2.655334  | 1.154643  |
| C  | 1.040923  | 4.038780  | -0.479617 |
| H  | 1.906582  | 4.614031  | -0.118808 |
| H  | 1.118390  | 4.008005  | -1.578410 |
| C  | -0.264192 | 4.737117  | -0.083214 |
| H  | -0.303123 | 5.748086  | -0.511216 |
| H  | -0.293033 | 4.859319  | 1.010824  |
| C  | -1.480280 | 3.918933  | -0.530787 |
| H  | -1.509444 | 3.877654  | -1.631576 |
| H  | -2.410614 | 4.409905  | -0.208257 |
| C  | -1.420864 | 2.480843  | 0.015835  |
| H  | -1.434451 | 2.552433  | 1.112327  |
| C  | 2.396425  | 1.902294  | -0.378033 |
| H  | 3.295239  | 2.336157  | 0.077781  |
| H  | 2.504160  | 2.011444  | -1.464380 |
| C  | -2.633337 | 1.659866  | -0.436930 |
| H  | -2.730605 | 1.739167  | -1.527214 |

|   |           |           |           |
|---|-----------|-----------|-----------|
| H | -3.579607 | 2.007493  | -0.003784 |
| C | 3.021521  | -0.210094 | 1.656625  |
| C | 2.440199  | 0.836733  | 2.627583  |
| H | 2.779498  | 1.852491  | 2.396603  |
| H | 2.769751  | 0.599881  | 3.648696  |
| H | 1.343266  | 0.826814  | 2.615962  |
| C | 4.551137  | -0.069181 | 1.626357  |
| H | 4.868261  | 0.895816  | 1.211985  |
| H | 5.025427  | -0.866002 | 1.045913  |
| H | 4.941733  | -0.132291 | 2.652160  |
| C | 2.618494  | -1.602914 | 2.172589  |
| H | 1.536660  | -1.655690 | 2.331900  |
| H | 3.110665  | -1.787687 | 3.137991  |
| H | 2.890852  | -2.413853 | 1.493243  |
| C | 3.146318  | -0.777204 | -1.447942 |
| C | 2.165852  | -0.746003 | -2.639765 |
| H | 1.842950  | 0.273118  | -2.890593 |
| H | 1.281689  | -1.349299 | -2.414821 |
| H | 2.660424  | -1.165522 | -3.527084 |
| C | 4.443379  | -0.038416 | -1.827193 |
| H | 4.264898  | 0.998530  | -2.132534 |
| H | 4.905328  | -0.554131 | -2.680659 |
| H | 5.174468  | -0.032195 | -1.013241 |
| C | 3.467194  | -2.246894 | -1.127860 |
| H | 4.201078  | -2.342459 | -0.319795 |
| H | 3.915338  | -2.704226 | -2.021950 |
| H | 2.578002  | -2.831237 | -0.871751 |
| C | -3.064493 | -1.114197 | -1.453820 |
| C | -4.452724 | -0.583973 | -1.852075 |
| H | -4.422698 | 0.466842  | -2.161963 |
| H | -5.185753 | -0.679297 | -1.045976 |
| H | -4.824520 | -1.165861 | -2.707265 |
| C | -3.149095 | -2.606620 | -1.093324 |
| H | -2.173955 | -2.986981 | -0.777035 |
| H | -3.461650 | -3.172234 | -1.982314 |
| H | -3.886306 | -2.802849 | -0.307083 |
| C | -2.094653 | -0.963738 | -2.646156 |
| H | -1.922944 | 0.086222  | -2.915889 |
| H | -2.522175 | -1.465805 | -3.525425 |
| H | -1.130228 | -1.426270 | -2.416553 |
| C | -3.065298 | -0.464652 | 1.636473  |
| C | -2.508997 | -1.784350 | 2.198058  |
| H | -2.730109 | -2.645245 | 1.562446  |
| H | -2.949135 | -1.972477 | 3.187506  |
| H | -1.422183 | -1.727023 | 2.313346  |

|   |           |           |           |
|---|-----------|-----------|-----------|
| C | -2.627811 | 0.666492  | 2.588271  |
| H | -3.073595 | 1.630853  | 2.321710  |
| H | -1.536972 | 0.779730  | 2.600452  |
| H | -2.953504 | 0.420650  | 3.608396  |
| C | -4.599869 | -0.509296 | 1.582873  |
| H | -4.965955 | -1.375539 | 1.023173  |
| H | -5.023824 | 0.396628  | 1.132436  |
| H | -4.997461 | -0.586996 | 2.604932  |
| O | 0.094437  | -2.115109 | -0.297718 |
| O | 0.975356  | -4.142064 | 0.077078  |
| C | 0.338901  | -3.156120 | 0.427209  |
| H | -0.089075 | -3.126727 | 1.457403  |

80

5,Ni-(O)-formate el energy= -1315.83780414

|    |           |           |           |
|----|-----------|-----------|-----------|
| Ni | -0.006184 | -0.191682 | 0.105423  |
| P  | 2.234087  | 0.064936  | 0.026215  |
| C  | -0.100435 | 1.716410  | -0.419412 |
| H  | -0.086307 | 1.643953  | -1.525394 |
| P  | -2.259188 | -0.168571 | -0.015989 |
| C  | 1.109545  | 2.564203  | 0.021134  |
| H  | 1.076554  | 2.640567  | 1.117855  |
| C  | 1.045702  | 3.998095  | -0.537183 |
| H  | 1.912455  | 4.580006  | -0.189361 |
| H  | 1.117145  | 3.950861  | -1.635808 |
| C  | -0.258019 | 4.698986  | -0.141356 |
| H  | -0.305977 | 5.701925  | -0.587269 |
| H  | -0.275596 | 4.840971  | 0.950550  |
| C  | -1.474473 | 3.867135  | -0.560731 |
| H  | -1.520146 | 3.813831  | -1.660453 |
| H  | -2.403199 | 4.355740  | -0.229682 |
| C  | -1.399775 | 2.433793  | -0.002355 |
| H  | -1.395384 | 2.512049  | 1.094722  |
| C  | 2.411904  | 1.872853  | -0.383005 |
| H  | 3.302551  | 2.330695  | 0.064972  |
| H  | 2.526059  | 1.948326  | -1.471110 |
| C  | -2.615690 | 1.611607  | -0.430144 |
| H  | -2.716664 | 1.675959  | -1.520260 |
| H  | -3.557209 | 1.974240  | 0.000665  |
| C  | 3.110354  | -0.167284 | 1.700781  |
| C  | 2.447958  | 0.835875  | 2.667353  |
| H  | 2.683245  | 1.875201  | 2.412889  |
| H  | 2.816858  | 0.651167  | 3.685651  |
| H  | 1.356928  | 0.720368  | 2.676521  |
| C  | 4.621234  | 0.105245  | 1.645719  |

|   |           |           |           |
|---|-----------|-----------|-----------|
| H | 4.854592  | 1.085290  | 1.211941  |
| H | 5.151669  | -0.660379 | 1.070452  |
| H | 5.030390  | 0.089879  | 2.666168  |
| C | 2.850093  | -1.586192 | 2.241495  |
| H | 1.780804  | -1.812156 | 2.266508  |
| H | 3.257632  | -1.657367 | 3.260276  |
| H | 3.338189  | -2.355671 | 1.636674  |
| C | 3.158972  | -0.806930 | -1.397276 |
| C | 2.162229  | -0.797287 | -2.575747 |
| H | 1.824018  | 0.216822  | -2.825156 |
| H | 1.289587  | -1.414970 | -2.343059 |
| H | 2.654244  | -1.211186 | -3.467516 |
| C | 4.449549  | -0.072021 | -1.805451 |
| H | 4.262450  | 0.955735  | -2.133860 |
| H | 4.904377  | -0.605326 | -2.652065 |
| H | 5.189045  | -0.041958 | -0.999850 |
| C | 3.498650  | -2.267279 | -1.057865 |
| H | 4.262890  | -2.341676 | -0.276891 |
| H | 3.902660  | -2.751728 | -1.957992 |
| H | 2.613437  | -2.832198 | -0.757128 |
| C | -3.061847 | -1.130070 | -1.455874 |
| C | -4.413767 | -0.532415 | -1.888854 |
| H | -4.328168 | 0.509647  | -2.214292 |
| H | -5.167449 | -0.580342 | -1.097388 |
| H | -4.794744 | -1.108896 | -2.743582 |
| C | -3.254702 | -2.618120 | -1.121663 |
| H | -2.321517 | -3.088566 | -0.803798 |
| H | -3.589316 | -3.140838 | -2.028827 |
| H | -4.021698 | -2.772170 | -0.355175 |
| C | -2.049516 | -1.015870 | -2.615399 |
| H | -1.813758 | 0.028105  | -2.859400 |
| H | -2.479062 | -1.477724 | -3.515858 |
| H | -1.121997 | -1.539872 | -2.365779 |
| C | -3.138015 | -0.492128 | 1.641973  |
| C | -2.742168 | -1.876935 | 2.188820  |
| H | -3.136423 | -2.692290 | 1.575705  |
| H | -3.159109 | -1.991011 | 3.199866  |
| H | -1.655868 | -1.990824 | 2.234047  |
| C | -2.601578 | 0.573352  | 2.619909  |
| H | -2.938516 | 1.582934  | 2.360042  |
| H | -1.504821 | 0.571584  | 2.649783  |
| H | -2.968494 | 0.350374  | 3.631239  |
| C | -4.667695 | -0.377749 | 1.558201  |
| H | -5.104907 | -1.193686 | 0.973764  |
| H | -4.993239 | 0.573238  | 1.119164  |

|   |           |           |           |
|---|-----------|-----------|-----------|
| H | -5.092206 | -0.436506 | 2.570771  |
| O | 0.082073  | -2.016764 | 0.815748  |
| O | 0.157445  | -3.113428 | -1.159560 |
| C | 0.143109  | -3.060958 | 0.072848  |
| H | 0.186374  | -4.005273 | 0.661354  |

80

5, TS-2-3      el energy= -1315.79764107

|    |           |           |           |
|----|-----------|-----------|-----------|
| Ni | 0.001259  | -0.400184 | -0.017875 |
| P  | 2.196238  | -0.264009 | -0.002049 |
| C  | -0.000106 | 1.538702  | -0.464716 |
| H  | -0.000013 | 1.466921  | -1.573234 |
| P  | -2.194077 | -0.267194 | -0.002694 |
| C  | 1.257806  | 2.319727  | -0.045340 |
| H  | 1.229453  | 2.430183  | 1.048435  |
| C  | 1.268120  | 3.738505  | -0.644156 |
| H  | 2.159800  | 4.292948  | -0.314207 |
| H  | 1.334121  | 3.656505  | -1.741142 |
| C  | -0.002209 | 4.512208  | -0.265079 |
| H  | -0.002862 | 5.502104  | -0.741887 |
| H  | -0.002465 | 4.690345  | 0.821767  |
| C  | -1.271321 | 3.736668  | -0.644454 |
| H  | -1.336836 | 3.654432  | -1.741451 |
| H  | -2.163904 | 4.289874  | -0.314869 |
| C  | -1.259137 | 2.317971  | -0.045475 |
| H  | -1.231037 | 2.428592  | 1.048291  |
| C  | 2.514699  | 1.530063  | -0.422988 |
| H  | 3.432773  | 1.925135  | 0.030445  |
| H  | 2.647340  | 1.580625  | -1.511088 |
| C  | -2.514873 | 1.526556  | -0.423284 |
| H  | -2.647456 | 1.577171  | -1.511391 |
| H  | -3.433571 | 1.920239  | 0.030084  |
| C  | 2.959559  | -0.545545 | 1.716460  |
| C  | 2.363403  | 0.536512  | 2.639462  |
| H  | 2.725409  | 1.539693  | 2.389354  |
| H  | 2.656539  | 0.325194  | 3.677084  |
| H  | 1.267631  | 0.542753  | 2.591321  |
| C  | 4.491537  | -0.434792 | 1.738801  |
| H  | 4.843130  | 0.515773  | 1.318715  |
| H  | 4.970988  | -1.251132 | 1.189303  |
| H  | 4.846380  | -0.487366 | 2.778094  |
| C  | 2.510103  | -1.918782 | 2.248171  |
| H  | 1.420530  | -2.012889 | 2.238202  |
| H  | 2.862496  | -2.037229 | 3.282775  |
| H  | 2.913397  | -2.750014 | 1.664140  |

|   |           |           |           |
|---|-----------|-----------|-----------|
| C | 3.130137  | -1.221011 | -1.361585 |
| C | 2.176624  | -1.195106 | -2.575305 |
| H | 1.904675  | -0.172820 | -2.867212 |
| H | 1.256642  | -1.746563 | -2.356909 |
| H | 2.667761  | -1.669265 | -3.436954 |
| C | 4.471142  | -0.567671 | -1.743371 |
| H | 4.347564  | 0.456007  | -2.111770 |
| H | 4.934686  | -1.151087 | -2.551455 |
| H | 5.176714  | -0.544252 | -0.907245 |
| C | 3.378869  | -2.686475 | -0.971445 |
| H | 4.113910  | -2.781976 | -0.165665 |
| H | 3.776744  | -3.223720 | -1.843829 |
| H | 2.458037  | -3.191557 | -0.672402 |
| C | -3.126397 | -1.225114 | -1.362657 |
| C | -4.468163 | -0.573498 | -1.744710 |
| H | -4.345934 | 0.450585  | -2.112422 |
| H | -5.174171 | -0.551643 | -0.908908 |
| H | -4.930453 | -1.157107 | -2.553373 |
| C | -3.373304 | -2.690951 | -0.972759 |
| H | -2.451827 | -3.194921 | -0.673781 |
| H | -3.770518 | -3.228560 | -1.845221 |
| H | -4.108224 | -2.787487 | -0.166996 |
| C | -2.172602 | -1.197777 | -2.576121 |
| H | -1.902044 | -0.175077 | -2.867882 |
| H | -2.662835 | -1.672567 | -3.437937 |
| H | -1.251881 | -1.747923 | -2.357533 |
| C | -2.957628 | -0.549837 | 1.715563  |
| C | -2.506877 | -1.922637 | 2.247244  |
| H | -2.909990 | -2.754263 | 1.663634  |
| H | -2.858513 | -2.041151 | 3.282098  |
| H | -1.417250 | -2.015948 | 2.236661  |
| C | -2.362786 | 0.532726  | 2.638831  |
| H | -2.725864 | 1.535548  | 2.388837  |
| H | -1.267014 | 0.540193  | 2.590812  |
| H | -2.655813 | 0.320919  | 3.676382  |
| C | -4.489720 | -0.440701 | 1.737510  |
| H | -4.968144 | -1.257438 | 1.187704  |
| H | -4.842225 | 0.509571  | 1.317528  |
| H | -4.844800 | -0.493883 | 2.776693  |
| H | 0.003223  | -1.943975 | 0.259370  |
| C | 0.003721  | -3.630484 | 0.042202  |
| O | 0.003740  | -3.752834 | -1.140622 |
| O | 0.003866  | -4.007721 | 1.166001  |

|            |                           |           |           |
|------------|---------------------------|-----------|-----------|
| 5, TS-3-4i | el energy= -1315.79794206 |           |           |
| Ni         | 0.007674                  | -0.458776 | -0.038954 |
| P          | 2.251484                  | -0.318093 | -0.010065 |
| C          | 0.013948                  | 1.457330  | -0.487588 |
| H          | 0.057473                  | 1.374923  | -1.590985 |
| P          | -2.240362                 | -0.324804 | -0.020858 |
| C          | 1.247411                  | 2.237706  | 0.003737  |
| H          | 1.171522                  | 2.317581  | 1.097808  |
| C          | 1.268212                  | 3.670441  | -0.565718 |
| H          | 2.144801                  | 4.214104  | -0.183490 |
| H          | 1.387374                  | 3.608905  | -1.659277 |
| C          | -0.017781                 | 4.435768  | -0.236618 |
| H          | -0.000417                 | 5.430335  | -0.702509 |
| H          | -0.073816                 | 4.600359  | 0.850598  |
| C          | -1.254284                 | 3.651813  | -0.689324 |
| H          | -1.265466                 | 3.578513  | -1.788480 |
| H          | -2.171538                 | 4.184655  | -0.398281 |
| C          | -1.258530                 | 2.230051  | -0.096642 |
| H          | -1.250967                 | 2.338984  | 0.996012  |
| C          | 2.534343                  | 1.490699  | -0.345300 |
| H          | 3.415662                  | 1.889400  | 0.171469  |
| H          | 2.722471                  | 1.591400  | -1.420694 |
| C          | -2.509949                 | 1.452286  | -0.500413 |
| H          | -2.610548                 | 1.477205  | -1.592494 |
| H          | -3.431872                 | 1.874107  | -0.081369 |
| C          | 3.031812                  | -0.648991 | 1.695990  |
| C          | 2.402385                  | 0.375806  | 2.661396  |
| H          | 2.728490                  | 1.400365  | 2.450402  |
| H          | 2.705887                  | 0.135182  | 3.689449  |
| H          | 1.306607                  | 0.345018  | 2.615868  |
| C          | 4.559889                  | -0.483596 | 1.704821  |
| H          | 4.880254                  | 0.475644  | 1.280709  |
| H          | 5.058024                  | -1.287830 | 1.154254  |
| H          | 4.922023                  | -0.523645 | 2.741880  |
| C          | 2.663164                  | -2.058904 | 2.194617  |
| H          | 1.583544                  | -2.175717 | 2.322835  |
| H          | 3.137467                  | -2.223707 | 3.172228  |
| H          | 3.003438                  | -2.850420 | 1.522032  |
| C          | 3.192247                  | -1.182128 | -1.425534 |
| C          | 2.286145                  | -1.011367 | -2.664134 |
| H          | 2.098188                  | 0.044450  | -2.898778 |
| H          | 1.330157                  | -1.517232 | -2.509685 |
| H          | 2.786300                  | -1.456922 | -3.535457 |
| C          | 4.565632                  | -0.545012 | -1.708575 |
| H          | 4.495772                  | 0.522318  | -1.945581 |

|   |           |           |           |
|---|-----------|-----------|-----------|
| H | 5.006526  | -1.043256 | -2.583249 |
| H | 5.265347  | -0.664034 | -0.876999 |
| C | 3.370449  | -2.684013 | -1.148011 |
| H | 4.071401  | -2.869243 | -0.326346 |
| H | 3.789293  | -3.160573 | -2.045604 |
| H | 2.412019  | -3.162804 | -0.932481 |
| C | -3.184968 | -1.308117 | -1.354679 |
| C | -4.531275 | -0.653883 | -1.720596 |
| H | -4.412367 | 0.370391  | -2.090516 |
| H | -5.234391 | -0.634710 | -0.883450 |
| H | -4.994858 | -1.238706 | -2.527242 |
| C | -3.428328 | -2.767544 | -0.931314 |
| H | -2.516677 | -3.277558 | -0.610377 |
| H | -3.829403 | -3.317543 | -1.794208 |
| H | -4.170082 | -2.840181 | -0.128143 |
| C | -2.261678 | -1.293433 | -2.591791 |
| H | -2.008710 | -0.272775 | -2.908153 |
| H | -2.782073 | -1.777576 | -3.430184 |
| H | -1.337341 | -1.840885 | -2.388015 |
| C | -3.021900 | -0.524441 | 1.705399  |
| C | -2.614022 | -1.881312 | 2.306963  |
| H | -2.933975 | -2.734472 | 1.706362  |
| H | -3.069950 | -1.976006 | 3.302785  |
| H | -1.529989 | -1.963924 | 2.421654  |
| C | -2.431700 | 0.584206  | 2.599318  |
| H | -2.791408 | 1.580553  | 2.319501  |
| H | -1.335328 | 0.586882  | 2.564022  |
| H | -2.735399 | 0.401853  | 3.639233  |
| C | -4.553279 | -0.394121 | 1.694538  |
| H | -5.031963 | -1.240030 | 1.191983  |
| H | -4.890240 | 0.531606  | 1.212143  |
| H | -4.920564 | -0.378701 | 2.730493  |
| O | 0.134432  | -2.723556 | -1.015715 |
| O | -0.550830 | -3.915899 | 0.803258  |
| C | -0.124796 | -2.946036 | 0.192240  |
| H | 0.080055  | -2.012035 | 0.902572  |

80

5, TS-4i-4 el energy= -1315.82375589

|    |           |          |           |
|----|-----------|----------|-----------|
| Ni | -0.889012 | 1.740216 | -0.028135 |
| P  | 1.362100  | 1.860145 | -0.032584 |
| C  | -0.863813 | 3.676134 | -0.411199 |
| H  | -0.844418 | 3.621688 | -1.519750 |
| P  | -3.111851 | 1.930904 | -0.051505 |
| C  | 0.397127  | 4.432905 | 0.046334  |



|   |           |           |           |
|---|-----------|-----------|-----------|
| H | 0.372538  | 4.488662  | 1.143931  |
| C | 0.425302  | 5.878739  | -0.485325 |
| H | 1.322870  | 6.398741  | -0.118752 |
| H | 0.505924  | 5.846993  | -1.583874 |
| C | -0.836508 | 6.653478  | -0.091835 |
| H | -0.814323 | 7.665265  | -0.519167 |
| H | -0.861098 | 6.776344  | 1.002187  |
| C | -2.097152 | 5.908551  | -0.543106 |
| H | -2.127869 | 5.872056  | -1.644034 |
| H | -2.998002 | 6.451273  | -0.219916 |
| C | -2.122939 | 4.467945  | -0.000488 |
| H | -2.125941 | 4.536719  | 1.096435  |
| C | 1.648461  | 3.666520  | -0.384522 |
| H | 2.571043  | 4.052009  | 0.067197  |
| H | 1.759024  | 3.766226  | -1.471123 |
| C | -3.387226 | 3.725869  | -0.446332 |
| H | -3.483101 | 3.808193  | -1.536447 |
| H | -4.307023 | 4.135609  | -0.010619 |
| C | 2.179352  | 1.533246  | 1.651308  |
| C | 1.635208  | 2.596030  | 2.626672  |
| H | 2.006031  | 3.601098  | 2.397109  |
| H | 1.960044  | 2.346193  | 3.646192  |
| H | 0.538355  | 2.621230  | 2.618514  |
| C | 3.712412  | 1.626799  | 1.613713  |
| H | 4.056939  | 2.587269  | 1.210688  |
| H | 4.158895  | 0.824220  | 1.019512  |
| H | 4.106792  | 1.538048  | 2.636167  |
| C | 1.732544  | 0.152185  | 2.163168  |
| H | 0.647565  | 0.130179  | 2.307643  |
| H | 2.209460  | -0.044369 | 3.133970  |
| H | 1.988396  | -0.664649 | 1.485246  |
| C | 2.266327  | 0.968569  | -1.457016 |
| C | 1.259366  | 1.000326  | -2.626084 |
| H | 0.937966  | 2.020361  | -2.875225 |
| H | 0.371641  | 0.409019  | -2.379911 |
| H | 1.726942  | 0.569053  | -3.522345 |
| C | 3.566055  | 1.683930  | -1.871846 |
| H | 3.396926  | 2.709162  | -2.218096 |
| H | 4.019668  | 1.130061  | -2.705567 |
| H | 4.300524  | 1.715194  | -1.060994 |
| C | 2.577129  | -0.499414 | -1.127638 |
| H | 3.344154  | -0.592699 | -0.350415 |
| H | 2.978005  | -0.979067 | -2.032630 |
| H | 1.687113  | -1.058501 | -0.819194 |
| C | -3.958019 | 0.977375  | -1.464004 |

|   |           |           |           |
|---|-----------|-----------|-----------|
| C | -5.302193 | 1.595440  | -1.887461 |
| H | -5.197929 | 2.636089  | -2.214587 |
| H | -6.047464 | 1.564291  | -1.087269 |
| H | -5.704732 | 1.025185  | -2.736597 |
| C | -4.152195 | -0.503316 | -1.098073 |
| H | -3.218475 | -0.940299 | -0.734715 |
| H | -4.466956 | -1.055163 | -1.994996 |
| H | -4.931599 | -0.640982 | -0.340577 |
| C | -2.961502 | 1.058633  | -2.640201 |
| H | -2.720887 | 2.094138  | -2.912949 |
| H | -3.401615 | 0.575758  | -3.523987 |
| H | -2.028443 | 0.543913  | -2.391279 |
| C | -3.948565 | 1.624319  | 1.627969  |
| C | -3.508165 | 0.257170  | 2.181755  |
| H | -3.852491 | -0.577199 | 1.566308  |
| H | -3.926553 | 0.128902  | 3.190158  |
| H | -2.418707 | 0.192650  | 2.241381  |
| C | -3.421201 | 2.709839  | 2.587954  |
| H | -3.782036 | 3.710150  | 2.324794  |
| H | -2.324630 | 2.729592  | 2.604540  |
| H | -3.771045 | 2.487833  | 3.605426  |
| C | -5.481642 | 1.707353  | 1.568285  |
| H | -5.914013 | 0.880497  | 0.996135  |
| H | -5.828829 | 2.650230  | 1.127756  |
| H | -5.889343 | 1.649264  | 2.587662  |
| O | -1.076514 | -0.198639 | 0.079529  |
| O | 0.116204  | -2.114145 | 0.059066  |
| C | -0.712839 | -1.345843 | 0.534249  |
| H | -1.262903 | -1.659910 | 1.456589  |

71

|         |            |                |           |
|---------|------------|----------------|-----------|
| 6, Pd-H | el energy= | -1081.04288702 |           |
| H       | 0.000000   | 0.000000       | 2.239116  |
| C       | 0.000000   | 0.000000       | -1.513399 |
| C       | -0.254203  | 1.184821       | -2.241447 |
| C       | -0.574791  | 2.461118       | -1.484617 |
| C       | -0.246402  | 1.182974       | -3.642431 |
| H       | -0.443492  | 2.103520       | -4.192033 |
| C       | 0.000000   | 0.000000       | -4.342382 |
| H       | 0.000000   | 0.000000       | -5.430691 |
| C       | 0.246402   | -1.182974      | -3.642431 |
| H       | 0.443492   | -2.103520      | -4.192033 |
| C       | 0.254203   | -1.184821      | -2.241447 |
| C       | 0.574791   | -2.461118      | -1.484617 |
| P       | -0.003725  | 2.287135       | 0.295043  |

|   |           |           |           |
|---|-----------|-----------|-----------|
| P | 0.003725  | -2.287135 | 0.295043  |
| C | -1.259055 | 3.298946  | 1.296255  |
| C | -2.526075 | 2.418346  | 1.345821  |
| C | -1.610141 | 4.657575  | 0.665558  |
| C | -0.746160 | 3.491683  | 2.732495  |
| C | 1.746376  | 3.026914  | 0.327801  |
| C | 1.780627  | 4.551475  | 0.145094  |
| C | 2.425623  | 2.631505  | 1.652622  |
| C | 2.522366  | 2.357226  | -0.825665 |
| C | -1.746376 | -3.026914 | 0.327801  |
| C | -2.522366 | -2.357226 | -0.825665 |
| C | -2.425623 | -2.631505 | 1.652622  |
| C | -1.780627 | -4.551475 | 0.145094  |
| C | 1.259055  | -3.298946 | 1.296255  |
| C | 1.610141  | -4.657575 | 0.665558  |
| C | 2.526075  | -2.418346 | 1.345821  |
| C | 0.746160  | -3.491683 | 2.732495  |
| H | -0.156669 | 3.355708  | -1.965503 |
| H | -1.662207 | 2.611712  | -1.448121 |
| H | 1.662207  | -2.611712 | -1.448121 |
| H | 0.156669  | -3.355708 | -1.965503 |
| H | -3.303009 | 2.932409  | 1.929184  |
| H | -2.935012 | 2.224032  | 0.346475  |
| H | -2.311192 | 1.452741  | 1.816482  |
| H | -0.754799 | 5.337897  | 0.631803  |
| H | -1.998545 | 4.548891  | -0.353584 |
| H | -2.394445 | 5.142146  | 1.264346  |
| H | 0.086290  | 4.202665  | 2.778994  |
| H | -1.555952 | 3.891997  | 3.358479  |
| H | -0.419354 | 2.539092  | 3.165761  |
| H | 2.824193  | 4.883765  | 0.050130  |
| H | 1.250529  | 4.871669  | -0.760439 |
| H | 1.347625  | 5.077731  | 1.002335  |
| H | 1.956982  | 3.104340  | 2.520844  |
| H | 2.385649  | 1.546890  | 1.800651  |
| H | 3.478894  | 2.945211  | 1.627825  |
| H | 2.125342  | 2.626105  | -1.810231 |
| H | 2.494645  | 1.265602  | -0.745049 |
| H | 3.570614  | 2.684519  | -0.782550 |
| H | -3.570614 | -2.684519 | -0.782550 |
| H | -2.494645 | -1.265602 | -0.745049 |
| H | -2.125342 | -2.626105 | -1.810231 |
| H | -1.956982 | -3.104340 | 2.520844  |
| H | -3.478894 | -2.945211 | 1.627825  |
| H | -2.385649 | -1.546890 | 1.800651  |

|    |           |           |           |
|----|-----------|-----------|-----------|
| H  | -2.824193 | -4.883765 | 0.050130  |
| H  | -1.250529 | -4.871669 | -0.760439 |
| H  | -1.347625 | -5.077731 | 1.002335  |
| H  | 2.394445  | -5.142146 | 1.264346  |
| H  | 0.754799  | -5.337897 | 0.631803  |
| H  | 1.998545  | -4.548891 | -0.353584 |
| H  | 2.311192  | -1.452741 | 1.816482  |
| H  | 3.303009  | -2.932409 | 1.929184  |
| H  | 2.935012  | -2.224032 | 0.346475  |
| H  | 1.555952  | -3.891997 | 3.358479  |
| H  | 0.419354  | -2.539092 | 3.165761  |
| H  | -0.086290 | -4.202665 | 2.778994  |
| Pd | 0.000000  | 0.000000  | 0.587703  |

70

6, Pd+ el energy= -1080.26595234

|   |           |           |           |
|---|-----------|-----------|-----------|
| C | 0.000000  | 0.000000  | -1.479709 |
| C | 0.129596  | 1.219946  | -2.171539 |
| C | 0.251346  | 2.530272  | -1.428791 |
| C | 0.133409  | 1.199607  | -3.572732 |
| H | 0.240296  | 2.136248  | -4.116335 |
| C | 0.000000  | 0.000000  | -4.270017 |
| H | 0.000000  | 0.000000  | -5.356826 |
| C | -0.133409 | -1.199607 | -3.572732 |
| H | -0.240296 | -2.136248 | -4.116335 |
| C | -0.129596 | -1.219946 | -2.171539 |
| C | -0.251346 | -2.530272 | -1.428791 |
| P | 0.862319  | 2.185279  | 0.295795  |
| P | -0.862319 | -2.185279 | 0.295795  |
| C | 0.066889  | 3.502513  | 1.400169  |
| C | -1.414237 | 3.087375  | 1.534980  |
| C | 0.148289  | 4.911973  | 0.786870  |
| C | 0.714181  | 3.487365  | 2.795482  |
| C | 2.754306  | 2.241300  | 0.237212  |
| C | 3.305645  | 3.670029  | 0.106476  |
| C | 3.299155  | 1.562292  | 1.509002  |
| C | 3.193623  | 1.406948  | -0.983446 |
| C | -2.754306 | -2.241300 | 0.237212  |
| C | -3.193623 | -1.406948 | -0.983446 |
| C | -3.299155 | -1.562292 | 1.509002  |
| C | -3.305645 | -3.670029 | 0.106476  |
| C | -0.066889 | -3.502513 | 1.400169  |
| C | -0.148289 | -4.911973 | 0.786870  |
| C | 1.414237  | -3.087375 | 1.534980  |
| C | -0.714181 | -3.487365 | 2.795482  |

|    |           |           |           |
|----|-----------|-----------|-----------|
| H  | 0.888676  | 3.247828  | -1.958589 |
| H  | -0.735551 | 2.999071  | -1.326957 |
| H  | 0.735551  | -2.999071 | -1.326957 |
| H  | -0.888676 | -3.247828 | -1.958589 |
| H  | -1.944943 | 3.834927  | 2.138632  |
| H  | -1.924600 | 3.023342  | 0.566629  |
| H  | -1.518519 | 2.116001  | 2.035066  |
| H  | 1.177674  | 5.263019  | 0.678818  |
| H  | -0.337301 | 4.964409  | -0.194146 |
| H  | -0.374176 | 5.617996  | 1.445896  |
| H  | 1.740770  | 3.866406  | 2.780509  |
| H  | 0.135675  | 4.133837  | 3.467819  |
| H  | 0.723380  | 2.480982  | 3.233862  |
| H  | 4.393825  | 3.623007  | -0.031518 |
| H  | 2.888995  | 4.196551  | -0.760658 |
| H  | 3.116553  | 4.271593  | 1.001042  |
| H  | 3.035625  | 2.100404  | 2.423991  |
| H  | 2.930526  | 0.532052  | 1.595219  |
| H  | 4.394621  | 1.520438  | 1.453688  |
| H  | 2.882420  | 1.854136  | -1.933223 |
| H  | 2.799133  | 0.385858  | -0.944584 |
| H  | 4.289620  | 1.347913  | -0.987478 |
| H  | -4.289620 | -1.347913 | -0.987478 |
| H  | -2.799133 | -0.385858 | -0.944584 |
| H  | -2.882420 | -1.854136 | -1.933223 |
| H  | -3.035625 | -2.100404 | 2.423991  |
| H  | -4.394621 | -1.520438 | 1.453688  |
| H  | -2.930526 | -0.532052 | 1.595219  |
| H  | -4.393825 | -3.623007 | -0.031518 |
| H  | -2.888995 | -4.196551 | -0.760658 |
| H  | -3.116553 | -4.271593 | 1.001042  |
| H  | 0.374176  | -5.617996 | 1.445896  |
| H  | -1.177674 | -5.263019 | 0.678818  |
| H  | 0.337301  | -4.964409 | -0.194146 |
| H  | 1.518519  | -2.116001 | 2.035066  |
| H  | 1.944943  | -3.834927 | 2.138632  |
| H  | 1.924600  | -3.023342 | 0.566629  |
| H  | -0.135675 | -4.133837 | 3.467819  |
| H  | -0.723380 | -2.480982 | 3.233862  |
| H  | -1.740770 | -3.866406 | 2.780509  |
| Pd | 0.000000  | 0.000000  | 0.537232  |

74

6, Pd-H+CO2 e1 energy= -1269.63551232

|   |          |          |          |
|---|----------|----------|----------|
| H | 0.047899 | 1.839523 | 0.167934 |
|---|----------|----------|----------|

|   |           |           |           |
|---|-----------|-----------|-----------|
| C | 0.012374  | -1.906706 | -0.022123 |
| C | 1.188776  | -2.634496 | -0.314472 |
| C | 2.471144  | -1.881869 | -0.616022 |
| C | 1.175550  | -4.034812 | -0.360508 |
| H | 2.090406  | -4.582404 | -0.587235 |
| C | -0.009687 | -4.735507 | -0.129915 |
| H | -0.018471 | -5.822892 | -0.173099 |
| C | -1.183059 | -4.036365 | 0.159269  |
| H | -2.105551 | -4.585450 | 0.348318  |
| C | -1.173348 | -2.636909 | 0.222668  |
| C | -2.436089 | -1.889487 | 0.606823  |
| P | 2.312416  | -0.111549 | -0.016075 |
| P | -2.266709 | -0.082722 | 0.131176  |
| C | 3.297698  | 0.897733  | -1.284818 |
| C | 2.405686  | 0.925427  | -2.544506 |
| C | 4.662280  | 0.285542  | -1.645954 |
| C | 3.476223  | 2.338224  | -0.779089 |
| C | 3.087253  | -0.103549 | 1.719052  |
| C | 4.610784  | -0.296356 | 1.722082  |
| C | 2.715584  | 1.216094  | 2.421214  |
| C | 2.422602  | -1.261817 | 2.492438  |
| C | -3.059222 | 0.049634  | -1.590789 |
| C | -2.430729 | -1.068471 | -2.448346 |
| C | -2.666425 | 1.402999  | -2.212710 |
| C | -4.586530 | -0.111889 | -1.585187 |
| C | -3.246241 | 0.840070  | 1.471152  |
| C | -4.579990 | 0.165573  | 1.838123  |
| C | -2.319280 | 0.841938  | 2.705510  |
| C | -3.489926 | 2.296172  | 1.045336  |
| H | 3.358951  | -2.376069 | -0.199020 |
| H | 2.630192  | -1.832243 | -1.701298 |
| H | -2.561887 | -1.911315 | 1.697595  |
| H | -3.343489 | -2.342085 | 0.184795  |
| H | 2.902834  | 1.517207  | -3.325831 |
| H | 2.230882  | -0.078914 | -2.949716 |
| H | 1.436014  | 1.382993  | -2.330038 |
| H | 5.355969  | 0.276077  | -0.801040 |
| H | 4.566940  | -0.740455 | -2.019669 |
| H | 5.123475  | 0.882587  | -2.445442 |
| H | 4.196443  | 2.396159  | 0.044843  |
| H | 3.856244  | 2.967499  | -1.595697 |
| H | 2.522325  | 2.759125  | -0.443285 |
| H | 4.961040  | -0.415955 | 2.757170  |
| H | 4.916713  | -1.191229 | 1.166141  |
| H | 5.133423  | 0.567931  | 1.298807  |

|    |           |           |           |
|----|-----------|-----------|-----------|
| H  | 3.180672  | 2.086299  | 1.948108  |
| H  | 1.631206  | 1.370143  | 2.411467  |
| H  | 3.057056  | 1.179805  | 3.465461  |
| H  | 2.679458  | -2.243394 | 2.080053  |
| H  | 1.331025  | -1.174071 | 2.482305  |
| H  | 2.765836  | -1.233181 | 3.536025  |
| H  | -2.779805 | -0.958140 | -3.484582 |
| H  | -1.337261 | -1.010447 | -2.441516 |
| H  | -2.711661 | -2.069103 | -2.103057 |
| H  | -3.059651 | 2.254409  | -1.648816 |
| H  | -3.066661 | 1.463208  | -3.234719 |
| H  | -1.577124 | 1.501980  | -2.263042 |
| H  | -4.952875 | -0.145457 | -2.621082 |
| H  | -4.901476 | -1.041659 | -1.095625 |
| H  | -5.087340 | 0.725741  | -1.088600 |
| H  | -4.441128 | -0.865285 | 2.182807  |
| H  | -5.050479 | 0.723975  | 2.659776  |
| H  | -5.286165 | 0.152253  | 1.003357  |
| H  | -1.376024 | 1.352738  | 2.483475  |
| H  | -2.818390 | 1.364507  | 3.533697  |
| H  | -2.081562 | -0.173188 | 3.047628  |
| H  | -3.892637 | 2.860479  | 1.898267  |
| H  | -2.562830 | 2.783352  | 0.728214  |
| H  | -4.220758 | 2.369976  | 0.232050  |
| C  | -0.383264 | 3.960043  | -1.273733 |
| O  | 0.311676  | 3.603548  | -2.140392 |
| O  | -1.088744 | 4.377875  | -0.444406 |
| Pd | 0.025901  | 0.192624  | 0.066073  |

74

6, Pd-(H)-formate el energy= -1269.62867829

|   |           |           |           |
|---|-----------|-----------|-----------|
| H | 0.152854  | 2.012693  | 0.170810  |
| C | 0.000931  | -1.858506 | 0.004691  |
| C | 1.165395  | -2.591355 | -0.313989 |
| C | 2.441743  | -1.859337 | -0.670365 |
| C | 1.131488  | -3.991787 | -0.333569 |
| H | 2.034203  | -4.550090 | -0.578674 |
| C | -0.052254 | -4.674980 | -0.053952 |
| H | -0.073163 | -5.762364 | -0.077447 |
| C | -1.208985 | -3.959480 | 0.257419  |
| H | -2.132203 | -4.492691 | 0.480925  |
| C | -1.188996 | -2.559401 | 0.297905  |
| C | -2.432601 | -1.794080 | 0.694236  |
| P | 2.338034  | -0.099052 | -0.047871 |
| P | -2.299878 | -0.023159 | 0.104233  |

|   |           |           |           |
|---|-----------|-----------|-----------|
| C | 3.292662  | 0.923399  | -1.326606 |
| C | 2.341682  | 1.037216  | -2.539004 |
| C | 4.608490  | 0.250692  | -1.757983 |
| C | 3.571797  | 2.339682  | -0.796369 |
| C | 3.125367  | -0.100889 | 1.676794  |
| C | 4.651986  | -0.270805 | 1.651832  |
| C | 2.739192  | 1.211431  | 2.386757  |
| C | 2.493326  | -1.274278 | 2.453330  |
| C | -3.037720 | 0.005584  | -1.641625 |
| C | -2.329335 | -1.102129 | -2.447832 |
| C | -2.706501 | 1.363506  | -2.292154 |
| C | -4.553182 | -0.250162 | -1.657172 |
| C | -3.314149 | 0.975853  | 1.363700  |
| C | -4.562347 | 0.209292  | 1.840278  |
| C | -2.351447 | 1.209911  | 2.548009  |
| C | -3.736099 | 2.345586  | 0.805488  |
| H | 3.339365  | -2.374535 | -0.305033 |
| H | 2.542012  | -1.795685 | -1.761608 |
| H | -2.497531 | -1.742864 | 1.789001  |
| H | -3.354062 | -2.279797 | 0.348859  |
| H | 2.871630  | 1.543854  | -3.357700 |
| H | 2.020219  | 0.056183  | -2.912271 |
| H | 1.458083  | 1.633496  | -2.288555 |
| H | 5.322251  | 0.153811  | -0.934811 |
| H | 4.445114  | -0.744068 | -2.188117 |
| H | 5.081439  | 0.867042  | -2.534848 |
| H | 4.287537  | 2.339703  | 0.033015  |
| H | 4.008026  | 2.938976  | -1.607074 |
| H | 2.650854  | 2.841738  | -0.485742 |
| H | 5.021967  | -0.372812 | 2.681575  |
| H | 4.958165  | -1.169722 | 1.102327  |
| H | 5.155567  | 0.593572  | 1.207283  |
| H | 3.150190  | 2.095419  | 1.890952  |
| H | 1.650557  | 1.329591  | 2.430500  |
| H | 3.125462  | 1.192848  | 3.415288  |
| H | 2.763040  | -2.249296 | 2.033039  |
| H | 1.400355  | -1.206610 | 2.465422  |
| H | 2.852792  | -1.243845 | 3.491001  |
| H | -2.688034 | -1.063560 | -3.485533 |
| H | -1.243344 | -0.962034 | -2.453662 |
| H | -2.534176 | -2.104507 | -2.056564 |
| H | -3.222680 | 2.197782  | -1.810158 |
| H | -3.019800 | 1.341299  | -3.345210 |
| H | -1.632458 | 1.577751  | -2.261354 |
| H | -4.899698 | -0.307045 | -2.698498 |



|    |           |           |           |
|----|-----------|-----------|-----------|
| H  | -4.815712 | -1.199106 | -1.172631 |
| H  | -5.114496 | 0.552416  | -1.168979 |
| H  | -4.311224 | -0.728005 | 2.348644  |
| H  | -5.105687 | 0.834878  | 2.561689  |
| H  | -5.250241 | -0.020606 | 1.020061  |
| H  | -1.531684 | 1.872452  | 2.250096  |
| H  | -2.900645 | 1.691109  | 3.369330  |
| H  | -1.928852 | 0.272512  | 2.933698  |
| H  | -4.200191 | 2.920974  | 1.618677  |
| H  | -2.879125 | 2.924670  | 0.451648  |
| H  | -4.479024 | 2.256391  | 0.006045  |
| C  | -0.154833 | 3.215055  | -0.219492 |
| O  | 0.274453  | 3.413208  | -1.342270 |
| O  | -0.760769 | 3.770690  | 0.677950  |
| Pd | 0.033381  | 0.202395  | 0.059970  |

74

6, Pd-(O)-formate-isomer el energy= -1269.64645852

|   |           |           |           |
|---|-----------|-----------|-----------|
| P | -2.343812 | -0.037083 | 0.109851  |
| P | 2.294875  | 0.128398  | -0.069019 |
| O | 0.215004  | -2.297671 | 0.529001  |
| O | 0.939611  | -4.149245 | -0.518995 |
| C | -3.220912 | -1.057751 | 1.444935  |
| C | -2.229314 | -1.097063 | 2.628984  |
| C | -3.437100 | -2.499333 | 0.955088  |
| C | -4.552447 | -0.439046 | 1.903809  |
| C | -3.186934 | -0.122090 | -1.589901 |
| C | -2.771727 | -1.431438 | -2.285407 |
| C | -4.717742 | -0.018926 | -1.510572 |
| C | -2.640108 | 1.054409  | -2.424231 |
| C | -2.508895 | 1.740085  | 0.654167  |
| C | -1.291182 | 2.504052  | 0.176721  |
| C | -1.337657 | 3.900345  | 0.081711  |
| C | -0.207229 | 4.621683  | -0.302190 |
| C | 0.977933  | 3.944378  | -0.589858 |
| C | 1.037763  | 2.547136  | -0.512633 |
| C | -0.103378 | 1.801225  | -0.135368 |
| C | 2.330053  | 1.830343  | -0.839833 |
| C | 3.333647  | -0.952725 | -1.231659 |
| C | 2.419765  | -1.256609 | -2.437909 |
| C | 4.596340  | -0.220406 | -1.724517 |
| C | 3.725507  | -2.280368 | -0.559717 |
| C | 3.046098  | 0.301046  | 1.662476  |
| C | 2.285737  | 1.448223  | 2.359524  |
| C | 2.779818  | -1.002470 | 2.442586  |

|   |           |           |           |
|---|-----------|-----------|-----------|
| C | 4.547740  | 0.624874  | 1.648507  |
| C | 0.142210  | -3.234782 | -0.362258 |
| H | -1.308793 | -1.617779 | 2.345724  |
| H | -2.694989 | -1.634681 | 3.466829  |
| H | -1.966813 | -0.093001 | 2.986490  |
| H | -4.188895 | -2.561704 | 0.160805  |
| H | -3.793972 | -3.112565 | 1.793973  |
| H | -2.500835 | -2.938784 | 0.596806  |
| H | -4.968514 | -1.049800 | 2.717179  |
| H | -5.297910 | -0.403414 | 1.104237  |
| H | -4.421663 | 0.576945  | 2.294264  |
| H | -1.681895 | -1.497706 | -2.375643 |
| H | -3.200476 | -1.455825 | -3.296889 |
| H | -3.119537 | -2.322078 | -1.754423 |
| H | -5.043600 | 0.879092  | -0.971281 |
| H | -5.165023 | -0.893030 | -1.026723 |
| H | -5.130009 | 0.040466  | -2.527579 |
| H | -3.032318 | 0.969862  | -3.447038 |
| H | -1.546411 | 1.041323  | -2.472507 |
| H | -2.944820 | 2.028581  | -2.027723 |
| H | -3.450791 | 2.196604  | 0.324203  |
| H | -2.534701 | 1.725446  | 1.751912  |
| H | -2.261327 | 4.426266  | 0.320485  |
| H | -0.247580 | 5.706618  | -0.370326 |
| H | 1.865377  | 4.505396  | -0.880287 |
| H | 3.214364  | 2.407978  | -0.541973 |
| H | 2.409384  | 1.674862  | -1.923947 |
| H | 2.027248  | -0.344983 | -2.906907 |
| H | 1.576475  | -1.887995 | -2.145539 |
| H | 2.998672  | -1.799555 | -3.197522 |
| H | 4.359420  | 0.694934  | -2.278997 |
| H | 5.143793  | -0.883743 | -2.408308 |
| H | 5.274886  | 0.041792  | -0.907542 |
| H | 4.192105  | -2.927216 | -1.315770 |
| H | 2.861023  | -2.820762 | -0.160085 |
| H | 4.463129  | -2.128165 | 0.235996  |
| H | 2.431187  | 2.414399  | 1.864160  |
| H | 2.654685  | 1.537251  | 3.390521  |
| H | 1.208980  | 1.251282  | 2.394996  |
| H | 3.023902  | -0.839789 | 3.501769  |
| H | 3.390937  | -1.833836 | 2.082404  |
| H | 1.733307  | -1.314047 | 2.363893  |
| H | 4.888347  | 0.806423  | 2.677597  |
| H | 4.772103  | 1.526634  | 1.064632  |
| H | 5.142121  | -0.202722 | 1.248921  |

|    |           |           |           |
|----|-----------|-----------|-----------|
| H  | -0.753347 | -3.174977 | -1.031403 |
| Pd | -0.017696 | -0.222626 | 0.050652  |

74

6, Pd-(O)-formate el energy= -1269.65988781

|   |           |           |           |
|---|-----------|-----------|-----------|
| P | -2.332475 | -0.064111 | 0.105694  |
| P | 2.310730  | 0.145154  | -0.055828 |
| O | 0.102269  | -2.378266 | 0.622654  |
| O | 0.020974  | -3.043117 | -1.539646 |
| C | -3.214504 | -1.020678 | 1.487050  |
| C | -2.229051 | -1.006490 | 2.676312  |
| C | -3.440417 | -2.482226 | 1.067069  |
| C | -4.546932 | -0.377973 | 1.910157  |
| C | -3.164984 | -0.226543 | -1.591956 |
| C | -2.855236 | -1.611600 | -2.189243 |
| C | -4.682911 | 0.005790  | -1.539084 |
| C | -2.511019 | 0.842375  | -2.492635 |
| C | -2.520573 | 1.731628  | 0.578464  |
| C | -1.297535 | 2.494523  | 0.117905  |
| C | -1.359544 | 3.888453  | -0.002264 |
| C | -0.228376 | 4.621463  | -0.359597 |
| C | 0.974052  | 3.956191  | -0.595390 |
| C | 1.050162  | 2.561040  | -0.494941 |
| C | -0.091324 | 1.801202  | -0.144761 |
| C | 2.364483  | 1.866182  | -0.775578 |
| C | 3.339810  | -0.901239 | -1.253133 |
| C | 2.453556  | -1.079076 | -2.505441 |
| C | 4.661944  | -0.224663 | -1.657703 |
| C | 3.619253  | -2.282141 | -0.635401 |
| C | 3.058409  | 0.272955  | 1.683495  |
| C | 2.284733  | 1.398044  | 2.402492  |
| C | 2.794767  | -1.050230 | 2.430182  |
| C | 4.558640  | 0.601348  | 1.691736  |
| C | 0.069891  | -3.245192 | -0.324535 |
| H | -1.314928 | -1.553961 | 2.425720  |
| H | -2.704470 | -1.491070 | 3.540930  |
| H | -1.953974 | 0.012213  | 2.978530  |
| H | -4.208825 | -2.575395 | 0.292639  |
| H | -3.780559 | -3.056455 | 1.940222  |
| H | -2.513213 | -2.937535 | 0.706392  |
| H | -4.975466 | -0.957911 | 2.739643  |
| H | -5.282946 | -0.366710 | 1.100995  |
| H | -4.415993 | 0.650380  | 2.266006  |
| H | -1.785079 | -1.842389 | -2.166690 |
| H | -3.193981 | -1.628282 | -3.234911 |

|    |           |           |           |
|----|-----------|-----------|-----------|
| H  | -3.379126 | -2.415797 | -1.664085 |
| H  | -4.946016 | 0.961802  | -1.069156 |
| H  | -5.199902 | -0.796802 | -1.002710 |
| H  | -5.080284 | 0.022722  | -2.563578 |
| H  | -2.919208 | 0.740355  | -3.507419 |
| H  | -1.425236 | 0.709310  | -2.544494 |
| H  | -2.707967 | 1.864179  | -2.150629 |
| H  | -3.454250 | 2.167906  | 0.201784  |
| H  | -2.582766 | 1.759700  | 1.674352  |
| H  | -2.298535 | 4.403343  | 0.197682  |
| H  | -0.281974 | 5.704473  | -0.446882 |
| H  | 1.863609  | 4.524009  | -0.865740 |
| H  | 3.225354  | 2.440900  | -0.410339 |
| H  | 2.505775  | 1.748061  | -1.857547 |
| H  | 2.184441  | -0.116409 | -2.959344 |
| H  | 1.534269  | -1.628317 | -2.276462 |
| H  | 3.018693  | -1.648109 | -3.257226 |
| H  | 4.498314  | 0.747062  | -2.137963 |
| H  | 5.177711  | -0.864659 | -2.387189 |
| H  | 5.339082  | -0.077327 | -0.811729 |
| H  | 3.993361  | -2.957568 | -1.416455 |
| H  | 2.714153  | -2.726681 | -0.211238 |
| H  | 4.382873  | -2.228518 | 0.148954  |
| H  | 2.429578  | 2.376671  | 1.931911  |
| H  | 2.642813  | 1.464606  | 3.439076  |
| H  | 1.208782  | 1.194083  | 2.421029  |
| H  | 3.024913  | -0.912959 | 3.496003  |
| H  | 3.422617  | -1.865170 | 2.058661  |
| H  | 1.750981  | -1.368097 | 2.334842  |
| H  | 4.885781  | 0.780674  | 2.725636  |
| H  | 4.790084  | 1.504111  | 1.112559  |
| H  | 5.159755  | -0.224637 | 1.298115  |
| H  | 0.092645  | -4.294692 | 0.051214  |
| Pd | 0.003513  | -0.233348 | 0.056144  |

74

6, TS-2-3 el energy= -1269.62812757

|   |           |           |           |
|---|-----------|-----------|-----------|
| H | 0.054774  | 1.891388  | 0.073999  |
| C | 0.002063  | -1.872604 | 0.001489  |
| C | 1.171646  | -2.601925 | -0.306500 |
| C | 2.440409  | -1.856861 | -0.667274 |
| C | 1.154860  | -4.002804 | -0.314512 |
| H | 2.063308  | -4.555529 | -0.552361 |
| C | -0.023438 | -4.695547 | -0.032515 |
| H | -0.033442 | -5.783446 | -0.046210 |

|   |           |           |           |
|---|-----------|-----------|-----------|
| C | -1.188792 | -3.988541 | 0.268026  |
| H | -2.106954 | -4.530245 | 0.493540  |
| C | -1.179650 | -2.587937 | 0.294833  |
| C | -2.431976 | -1.828347 | 0.680123  |
| P | 2.314611  | -0.088803 | -0.064220 |
| P | -2.293449 | -0.053249 | 0.099030  |
| C | 3.296521  | 0.915950  | -1.338661 |
| C | 2.357160  | 1.037091  | -2.558515 |
| C | 4.607463  | 0.229385  | -1.762882 |
| C | 3.592548  | 2.329014  | -0.810367 |
| C | 3.092557  | -0.075722 | 1.666225  |
| C | 4.617032  | -0.265235 | 1.656869  |
| C | 2.717486  | 1.248748  | 2.359000  |
| C | 2.440677  | -1.231674 | 2.452801  |
| C | -3.052217 | -0.017405 | -1.639082 |
| C | -2.367125 | -1.139477 | -2.446068 |
| C | -2.702508 | 1.331036  | -2.298762 |
| C | -4.571726 | -0.245663 | -1.646507 |
| C | -3.299774 | 0.936259  | 1.370696  |
| C | -4.574967 | 0.199705  | 1.821147  |
| C | -2.347646 | 1.116019  | 2.572600  |
| C | -3.672116 | 2.328285  | 0.834698  |
| H | 3.344997  | -2.355925 | -0.295714 |
| H | 2.542644  | -1.803389 | -1.759161 |
| H | -2.514207 | -1.784238 | 1.774239  |
| H | -3.349079 | -2.312015 | 0.319215  |
| H | 2.887963  | 1.555845  | -3.369081 |
| H | 2.044504  | 0.057141  | -2.941396 |
| H | 1.463542  | 1.617096  | -2.308901 |
| H | 5.311392  | 0.118084  | -0.933096 |
| H | 4.434543  | -0.760938 | -2.198844 |
| H | 5.097139  | 0.842758  | -2.532017 |
| H | 4.320788  | 2.320742  | 0.007863  |
| H | 4.018768  | 2.931132  | -1.624476 |
| H | 2.681413  | 2.833249  | -0.476262 |
| H | 4.977690  | -0.357366 | 2.690979  |
| H | 4.916003  | -1.175822 | 1.122881  |
| H | 5.136143  | 0.585919  | 1.204427  |
| H | 3.161690  | 2.119920  | 1.868891  |
| H | 1.631060  | 1.390510  | 2.371776  |
| H | 3.077255  | 1.228568  | 3.397221  |
| H | 2.695579  | -2.214647 | 2.042217  |
| H | 1.348964  | -1.147146 | 2.458968  |
| H | 2.797748  | -1.196386 | 3.491322  |
| H | -2.724826 | -1.094576 | -3.484026 |

|    |           |           |           |
|----|-----------|-----------|-----------|
| H  | -1.278416 | -1.022819 | -2.449553 |
| H  | -2.592783 | -2.136878 | -2.053786 |
| H  | -3.189518 | 2.178194  | -1.807758 |
| H  | -3.034819 | 1.316876  | -3.346177 |
| H  | -1.622225 | 1.512764  | -2.284013 |
| H  | -4.923820 | -0.310925 | -2.685598 |
| H  | -4.849474 | -1.182420 | -1.147326 |
| H  | -5.116675 | 0.574111  | -1.167744 |
| H  | -4.355348 | -0.764065 | 2.293258  |
| H  | -5.096651 | 0.816027  | 2.566481  |
| H  | -5.270382 | 0.023500  | 0.994605  |
| H  | -1.484679 | 1.729945  | 2.294618  |
| H  | -2.884775 | 1.621014  | 3.387632  |
| H  | -1.980928 | 0.156230  | 2.959257  |
| H  | -4.120972 | 2.910887  | 1.651210  |
| H  | -2.794349 | 2.880467  | 0.489491  |
| H  | -4.409838 | 2.277059  | 0.027073  |
| C  | -0.110973 | 3.420061  | -0.214454 |
| O  | 0.329437  | 3.574940  | -1.314234 |
| O  | -0.609663 | 3.844204  | 0.784524  |
| Pd | 0.016803  | 0.204448  | 0.030831  |

74

6,TS-3-4i el energy= -1269.62403797

|   |           |           |           |
|---|-----------|-----------|-----------|
| H | -0.281090 | -2.168701 | 0.804984  |
| C | -0.084147 | 1.748233  | 0.051840  |
| C | 1.079325  | 2.483602  | 0.369299  |
| C | 2.341331  | 1.763168  | 0.775898  |
| C | 1.057497  | 3.883772  | 0.340395  |
| H | 1.964071  | 4.437248  | 0.580905  |
| C | -0.112449 | 4.571257  | 0.019787  |
| H | -0.122262 | 5.658754  | 0.004839  |
| C | -1.270342 | 3.854324  | -0.276821 |
| H | -2.188789 | 4.384517  | -0.525041 |
| C | -1.266112 | 2.453430  | -0.268908 |
| C | -2.526164 | 1.701188  | -0.627744 |
| P | 2.299249  | 0.011141  | 0.135212  |
| P | -2.371352 | -0.054647 | -0.023023 |
| C | 3.375724  | -0.954464 | 1.374353  |
| C | 2.443987  | -1.279818 | 2.561652  |
| C | 4.567581  | -0.108599 | 1.865063  |
| C | 3.898630  | -2.274678 | 0.782956  |
| C | 3.042591  | 0.066879  | -1.608729 |
| C | 4.526199  | 0.469033  | -1.609441 |
| C | 2.853323  | -1.308122 | -2.280433 |

|   |           |           |           |
|---|-----------|-----------|-----------|
| C | 2.233530  | 1.110756  | -2.405423 |
| C | -3.158064 | -0.078457 | 1.705867  |
| C | -2.558930 | 1.112285  | 2.482251  |
| C | -2.746835 | -1.376508 | 2.426154  |
| C | -4.689161 | 0.048689  | 1.680049  |
| C | -3.300617 | -1.084980 | -1.315269 |
| C | -4.677843 | -0.493957 | -1.666714 |
| C | -2.401731 | -1.076167 | -2.571619 |
| C | -3.444365 | -2.537175 | -0.830820 |
| H | 3.247379  | 2.300731  | 0.470701  |
| H | 2.377549  | 1.681032  | 1.870039  |
| H | -2.636697 | 1.648616  | -1.718134 |
| H | -3.429798 | 2.192097  | -0.245175 |
| H | 3.044199  | -1.696194 | 3.382754  |
| H | 1.928147  | -0.389257 | 2.945273  |
| H | 1.700052  | -2.028199 | 2.272050  |
| H | 5.224810  | 0.206333  | 1.048296  |
| H | 4.252078  | 0.784693  | 2.414908  |
| H | 5.166776  | -0.719018 | 2.554324  |
| H | 4.652781  | -2.105690 | 0.006960  |
| H | 4.382414  | -2.843145 | 1.589615  |
| H | 3.090757  | -2.897314 | 0.388263  |
| H | 4.871624  | 0.563208  | -2.648382 |
| H | 4.696089  | 1.436016  | -1.119278 |
| H | 5.156967  | -0.280958 | -1.122333 |
| H | 3.500007  | -2.074590 | -1.845795 |
| H | 1.821209  | -1.666007 | -2.202144 |
| H | 3.113888  | -1.218003 | -3.344436 |
| H | 2.322098  | 2.121232  | -1.992019 |
| H | 1.169661  | 0.852776  | -2.435990 |
| H | 2.612027  | 1.131461  | -3.436497 |
| H | -2.910815 | 1.066152  | 3.521886  |
| H | -1.464346 | 1.079250  | 2.487948  |
| H | -2.863060 | 2.079732  | 2.068228  |
| H | -3.094935 | -2.276025 | 1.910040  |
| H | -3.180638 | -1.379316 | 3.435644  |
| H | -1.658139 | -1.446940 | 2.523307  |
| H | -5.057710 | 0.170028  | 2.708104  |
| H | -5.024913 | 0.920651  | 1.105392  |
| H | -5.167197 | -0.844337 | 1.264828  |
| H | -4.608789 | 0.544837  | -2.010732 |
| H | -5.109640 | -1.080189 | -2.489489 |
| H | -5.382309 | -0.531855 | -0.831937 |
| H | -1.441114 | -1.554808 | -2.361499 |
| H | -2.909150 | -1.639873 | -3.366876 |

|    |           |           |           |
|----|-----------|-----------|-----------|
| H  | -2.225403 | -0.061975 | -2.952277 |
| H  | -3.879564 | -3.139422 | -1.640019 |
| H  | -2.467913 | -2.967747 | -0.589027 |
| H  | -4.110358 | -2.622255 | 0.035181  |
| C  | 0.280442  | -2.893844 | 0.053447  |
| O  | 1.013222  | -3.701530 | 0.618534  |
| O  | 0.004321  | -2.673438 | -1.150823 |
| Pd | -0.045793 | -0.285920 | 0.073621  |

74

6, TS-4i-4      el energy= -1269.64636887

|   |           |           |           |
|---|-----------|-----------|-----------|
| P | -2.354489 | -0.056854 | 0.096572  |
| P | 2.299390  | 0.064949  | -0.030101 |
| O | 0.112673  | -2.402888 | 0.585855  |
| O | 1.028701  | -4.057256 | -0.641935 |
| C | -3.252304 | -1.038061 | 1.446969  |
| C | -2.283413 | -1.035231 | 2.650324  |
| C | -3.450972 | -2.495387 | 0.998867  |
| C | -4.594671 | -0.410122 | 1.859040  |
| C | -3.166657 | -0.188863 | -1.614381 |
| C | -2.740914 | -1.518485 | -2.264044 |
| C | -4.698422 | -0.081396 | -1.567038 |
| C | -2.600432 | 0.963265  | -2.469688 |
| C | -2.523048 | 1.733933  | 0.591088  |
| C | -1.285206 | 2.479450  | 0.137515  |
| C | -1.316450 | 3.875559  | 0.032743  |
| C | -0.170092 | 4.585687  | -0.322509 |
| C | 1.016438  | 3.896872  | -0.573338 |
| C | 1.062994  | 2.499516  | -0.488471 |
| C | -0.094193 | 1.765427  | -0.137895 |
| C | 2.355933  | 1.773532  | -0.786202 |
| C | 3.372855  | -0.994750 | -1.182967 |
| C | 2.478558  | -1.310621 | -2.400879 |
| C | 4.629320  | -0.236742 | -1.653207 |
| C | 3.780626  | -2.317956 | -0.513091 |
| C | 3.013644  | 0.222361  | 1.718947  |
| C | 2.226043  | 1.350927  | 2.416168  |
| C | 2.746252  | -1.096166 | 2.473832  |
| C | 4.511241  | 0.563860  | 1.740278  |
| C | 0.106981  | -3.309453 | -0.337719 |
| H | -1.357768 | -1.563672 | 2.400504  |
| H | -2.763730 | -1.547181 | 3.495921  |
| H | -2.029813 | -0.019633 | 2.980552  |
| H | -4.182936 | -2.586683 | 0.188958  |
| H | -3.826200 | -3.082547 | 1.848429  |



|    |           |           |           |
|----|-----------|-----------|-----------|
| H  | -2.501939 | -2.937518 | 0.680045  |
| H  | -5.022739 | -0.994436 | 2.685470  |
| H  | -5.325308 | -0.406838 | 1.045175  |
| H  | -4.476458 | 0.619666  | 2.216040  |
| H  | -1.649847 | -1.591399 | -2.329964 |
| H  | -3.149255 | -1.570037 | -3.282886 |
| H  | -3.102632 | -2.392445 | -1.715048 |
| H  | -5.033136 | 0.831310  | -1.058600 |
| H  | -5.156005 | -0.941777 | -1.068349 |
| H  | -5.091067 | -0.049290 | -2.592987 |
| H  | -2.972272 | 0.851769  | -3.497444 |
| H  | -1.505966 | 0.946177  | -2.495934 |
| H  | -2.910587 | 1.948658  | -2.106205 |
| H  | -3.450035 | 2.187811  | 0.218169  |
| H  | -2.586322 | 1.748464  | 1.687195  |
| H  | -2.242258 | 4.409797  | 0.242820  |
| H  | -0.199431 | 5.670513  | -0.397262 |
| H  | 1.916454  | 4.448248  | -0.842522 |
| H  | 3.237187  | 2.343659  | -0.465964 |
| H  | 2.457897  | 1.624293  | -1.869153 |
| H  | 2.058189  | -0.405630 | -2.859068 |
| H  | 1.659643  | -1.979057 | -2.121460 |
| H  | 3.081906  | -1.820745 | -3.164411 |
| H  | 4.386109  | 0.669887  | -2.218791 |
| H  | 5.204274  | -0.892846 | -2.321109 |
| H  | 5.285390  | 0.044151  | -0.823896 |
| H  | 4.281534  | -2.944565 | -1.264472 |
| H  | 2.914565  | -2.881635 | -0.150194 |
| H  | 4.493972  | -2.157390 | 0.302777  |
| H  | 2.362936  | 2.323913  | 1.931637  |
| H  | 2.578877  | 1.435903  | 3.453153  |
| H  | 1.152055  | 1.136623  | 2.434740  |
| H  | 2.946802  | -0.941825 | 3.543356  |
| H  | 3.389593  | -1.908764 | 2.127079  |
| H  | 1.710620  | -1.430525 | 2.351709  |
| H  | 4.830563  | 0.726126  | 2.779390  |
| H  | 4.735048  | 1.481431  | 1.181319  |
| H  | 5.123090  | -0.247032 | 1.333071  |
| H  | -0.863767 | -3.407967 | -0.888393 |
| Pd | -0.028614 | -0.264069 | 0.060871  |

71

7, Co-H el energy= -1115.97621720

|   |           |          |           |
|---|-----------|----------|-----------|
| H | 0.000000  | 0.000000 | 1.936055  |
| C | -0.254474 | 1.145082 | -2.260116 |

|   |           |           |           |
|---|-----------|-----------|-----------|
| C | -0.578756 | 2.385560  | -1.462752 |
| C | -0.248103 | 1.170044  | -3.652530 |
| H | -0.454124 | 2.106363  | -4.165133 |
| C | 0.000000  | 0.000000  | -4.370285 |
| H | 0.000000  | 0.000000  | -5.457302 |
| C | 0.248103  | -1.170044 | -3.652530 |
| H | 0.454124  | -2.106363 | -4.165133 |
| C | 0.254474  | -1.145082 | -2.260116 |
| C | 0.578756  | -2.385560 | -1.462752 |
| P | 0.034404  | 2.145412  | 0.300454  |
| P | -0.034404 | -2.145412 | 0.300454  |
| C | -1.215111 | 3.144089  | 1.331241  |
| C | -2.469185 | 2.246386  | 1.393598  |
| C | -1.597650 | 4.512229  | 0.743810  |
| C | -0.673805 | 3.310755  | 2.761034  |
| C | 1.761973  | 2.954905  | 0.302204  |
| C | 1.775009  | 4.481968  | 0.154322  |
| C | 2.482962  | 2.533737  | 1.597206  |
| C | 2.517540  | 2.319605  | -0.883567 |
| C | -1.761973 | -2.954905 | 0.302204  |
| C | -2.517540 | -2.319605 | -0.883567 |
| C | -2.482962 | -2.533737 | 1.597206  |
| C | -1.775009 | -4.481968 | 0.154322  |
| C | 1.215111  | -3.144089 | 1.331241  |
| C | 1.597650  | -4.512229 | 0.743810  |
| C | 2.469185  | -2.246386 | 1.393598  |
| C | 0.673805  | -3.310755 | 2.761034  |
| H | -0.212785 | 3.288454  | -1.968154 |
| H | -1.669906 | 2.485012  | -1.392356 |
| H | 1.669906  | -2.485012 | -1.392356 |
| H | 0.212785  | -3.288454 | -1.968154 |
| H | -3.229969 | 2.722201  | 2.029671  |
| H | -2.915907 | 2.091169  | 0.403197  |
| H | -2.217565 | 1.263317  | 1.806134  |
| H | -0.751867 | 5.204219  | 0.706394  |
| H | -2.007934 | 4.424085  | -0.269393 |
| H | -2.374981 | 4.974241  | 1.369803  |
| H | 0.153882  | 4.027577  | 2.805644  |
| H | -1.472457 | 3.689588  | 3.414737  |
| H | -0.329050 | 2.350988  | 3.163429  |
| H | 2.810656  | 4.834118  | 0.038244  |
| H | 1.213918  | 4.816343  | -0.727649 |
| H | 1.358630  | 4.982558  | 1.034981  |
| H | 2.036258  | 2.984543  | 2.488608  |
| H | 2.446366  | 1.445640  | 1.719151  |

|    |           |           |           |
|----|-----------|-----------|-----------|
| H  | 3.535236  | 2.850612  | 1.553007  |
| H  | 2.100850  | 2.616875  | -1.852962 |
| H  | 2.490365  | 1.225423  | -0.823996 |
| H  | 3.567693  | 2.643455  | -0.859314 |
| H  | -3.567693 | -2.643455 | -0.859314 |
| H  | -2.490365 | -1.225423 | -0.823996 |
| H  | -2.100850 | -2.616875 | -1.852962 |
| H  | -2.036258 | -2.984543 | 2.488608  |
| H  | -3.535236 | -2.850612 | 1.553007  |
| H  | -2.446366 | -1.445640 | 1.719151  |
| H  | -2.810656 | -4.834118 | 0.038244  |
| H  | -1.213918 | -4.816343 | -0.727649 |
| H  | -1.358630 | -4.982558 | 1.034981  |
| H  | 2.374981  | -4.974241 | 1.369803  |
| H  | 0.751867  | -5.204219 | 0.706394  |
| H  | 2.007934  | -4.424085 | -0.269393 |
| H  | 2.217565  | -1.263317 | 1.806134  |
| H  | 3.229969  | -2.722201 | 2.029671  |
| H  | 2.915907  | -2.091169 | 0.403197  |
| H  | 1.472457  | -3.689588 | 3.414737  |
| H  | 0.329050  | -2.350988 | 3.163429  |
| H  | -0.153882 | -4.027577 | 2.805644  |
| N  | 0.000000  | 0.000000  | -1.550823 |
| Co | 0.000000  | 0.000000  | 0.389464  |

70

7, Co+      el energy= -1115.21302423

|   |           |           |           |
|---|-----------|-----------|-----------|
| C | 0.121961  | 1.168594  | -2.184248 |
| C | 0.223069  | 2.443117  | -1.385880 |
| C | 0.132105  | 1.191203  | -3.577482 |
| H | 0.234362  | 2.141971  | -4.092355 |
| C | 0.000000  | 0.000000  | -4.287113 |
| H | 0.000000  | 0.000000  | -5.373875 |
| C | -0.132105 | -1.191203 | -3.577482 |
| H | -0.234362 | -2.141971 | -4.092355 |
| C | -0.121961 | -1.168594 | -2.184248 |
| C | -0.223069 | -2.443117 | -1.385880 |
| P | 0.842078  | 2.071865  | 0.340126  |
| P | -0.842078 | -2.071865 | 0.340126  |
| C | 0.056834  | 3.431135  | 1.408158  |
| C | -1.419755 | 3.014346  | 1.580600  |
| C | 0.118482  | 4.829435  | 0.768981  |
| C | 0.725638  | 3.453331  | 2.793882  |
| C | 2.734184  | 2.190129  | 0.233225  |
| C | 3.266541  | 3.617362  | 0.041269  |

|   |           |           |           |
|---|-----------|-----------|-----------|
| C | 3.322749  | 1.559622  | 1.511002  |
| C | 3.156326  | 1.317127  | -0.966746 |
| C | -2.734184 | -2.190129 | 0.233225  |
| C | -3.156326 | -1.317127 | -0.966746 |
| C | -3.322749 | -1.559622 | 1.511002  |
| C | -3.266541 | -3.617362 | 0.041269  |
| C | -0.056834 | -3.431135 | 1.408158  |
| C | -0.118482 | -4.829435 | 0.768981  |
| C | 1.419755  | -3.014346 | 1.580600  |
| C | -0.725638 | -3.453331 | 2.793882  |
| H | 0.823927  | 3.189801  | -1.917045 |
| H | -0.781390 | 2.869145  | -1.269291 |
| H | 0.781390  | -2.869145 | -1.269291 |
| H | -0.823927 | -3.189801 | -1.917045 |
| H | -1.941999 | 3.770433  | 2.181585  |
| H | -1.949565 | 2.933299  | 0.623516  |
| H | -1.510215 | 2.050038  | 2.095468  |
| H | 1.143377  | 5.181059  | 0.626420  |
| H | -0.393257 | 4.864541  | -0.199700 |
| H | -0.388020 | 5.547514  | 1.427600  |
| H | 1.747176  | 3.844246  | 2.753587  |
| H | 0.150681  | 4.107251  | 3.462304  |
| H | 0.754814  | 2.456593  | 3.252841  |
| H | 4.351665  | 3.580860  | -0.123974 |
| H | 2.820444  | 4.113204  | -0.829644 |
| H | 3.093299  | 4.244712  | 0.921194  |
| H | 3.083939  | 2.130922  | 2.412566  |
| H | 2.957924  | 0.533720  | 1.647123  |
| H | 4.416575  | 1.519158  | 1.425608  |
| H | 2.827871  | 1.733423  | -1.925765 |
| H | 2.764217  | 0.296869  | -0.880793 |
| H | 4.251969  | 1.256852  | -0.993856 |
| H | -4.251969 | -1.256852 | -0.993856 |
| H | -2.764217 | -0.296869 | -0.880793 |
| H | -2.827871 | -1.733423 | -1.925765 |
| H | -3.083939 | -2.130922 | 2.412566  |
| H | -4.416575 | -1.519158 | 1.425608  |
| H | -2.957924 | -0.533720 | 1.647123  |
| H | -4.351665 | -3.580860 | -0.123974 |
| H | -2.820444 | -4.113204 | -0.829644 |
| H | -3.093299 | -4.244712 | 0.921194  |
| H | 0.388020  | -5.547514 | 1.427600  |
| H | -1.143377 | -5.181059 | 0.626420  |
| H | 0.393257  | -4.864541 | -0.199700 |
| H | 1.510215  | -2.050038 | 2.095468  |

|    |           |           |           |
|----|-----------|-----------|-----------|
| H  | 1.941999  | -3.770433 | 2.181585  |
| H  | 1.949565  | -2.933299 | 0.623516  |
| H  | -0.150681 | -4.107251 | 3.462304  |
| H  | -0.754814 | -2.456593 | 3.252841  |
| H  | -1.747176 | -3.844246 | 2.753587  |
| Co | 0.000000  | 0.000000  | 0.420786  |
| N  | 0.000000  | 0.000000  | -1.495345 |

74

7, Co-H+CO2 e1 energy= -1304.56897935

|   |           |           |           |
|---|-----------|-----------|-----------|
| H | -0.023860 | 1.590881  | -0.008343 |
| C | -1.147324 | -2.603022 | 0.354212  |
| C | -2.387570 | -1.807109 | 0.680372  |
| C | -1.165309 | -3.995463 | 0.388278  |
| H | -2.092598 | -4.505511 | 0.636894  |
| C | -0.000625 | -4.715017 | 0.123534  |
| H | 0.005540  | -5.801548 | 0.156332  |
| C | 1.154539  | -3.999696 | -0.190686 |
| H | 2.084547  | -4.513480 | -0.420640 |
| C | 1.120979  | -2.608084 | -0.236206 |
| C | 2.336435  | -1.818644 | -0.653390 |
| P | -2.164045 | -0.052419 | 0.043037  |
| P | 2.135581  | -0.037583 | -0.082029 |
| C | -3.172624 | 0.977840  | 1.285016  |
| C | -2.281835 | 1.049662  | 2.543196  |
| C | -4.537847 | 0.383135  | 1.668254  |
| C | -3.354104 | 2.401494  | 0.731711  |
| C | -2.979730 | -0.075729 | -1.682013 |
| C | -4.504142 | -0.248729 | -1.688405 |
| C | -2.583796 | 1.221769  | -2.413061 |
| C | -2.328453 | -1.255946 | -2.432693 |
| C | 3.064719  | 0.009873  | 1.583420  |
| C | 2.458512  | -1.132921 | 2.424315  |
| C | 2.725010  | 1.338529  | 2.284566  |
| C | 4.585056  | -0.174422 | 1.492656  |
| C | 3.062344  | 0.937151  | -1.432473 |
| C | 4.379569  | 0.295715  | -1.900750 |
| C | 2.071915  | 0.995411  | -2.614564 |
| C | 3.324581  | 2.375370  | -0.957182 |
| H | -3.290328 | -2.321126 | 0.326087  |
| H | -2.480643 | -1.724669 | 1.770946  |
| H | 2.368446  | -1.783350 | -1.750235 |
| H | 3.261634  | -2.310819 | -0.328051 |
| H | -2.768059 | 1.682477  | 3.299862  |
| H | -2.124896 | 0.060597  | 2.992328  |

|    |           |           |           |
|----|-----------|-----------|-----------|
| H  | -1.302048 | 1.473215  | 2.306808  |
| H  | -5.228655 | 0.333978  | 0.822336  |
| H  | -4.442611 | -0.625847 | 2.087028  |
| H  | -5.004882 | 1.011821  | 2.440333  |
| H  | -4.098596 | 2.435230  | -0.071772 |
| H  | -3.701958 | 3.068514  | 1.532989  |
| H  | -2.410560 | 2.798646  | 0.341585  |
| H  | -4.857227 | -0.380193 | -2.721830 |
| H  | -4.822939 | -1.130550 | -1.118082 |
| H  | -5.017548 | 0.627810  | -1.279229 |
| H  | -3.053102 | 2.107398  | -1.973869 |
| H  | -1.498519 | 1.366447  | -2.378468 |
| H  | -2.899878 | 1.163123  | -3.464790 |
| H  | -2.601450 | -2.226989 | -2.003023 |
| H  | -1.235629 | -1.173485 | -2.417711 |
| H  | -2.664400 | -1.248675 | -3.479269 |
| H  | 2.855855  | -1.080273 | 3.447828  |
| H  | 1.366595  | -1.047255 | 2.471337  |
| H  | 2.703958  | -2.123258 | 2.023201  |
| H  | 3.155742  | 2.203305  | 1.770028  |
| H  | 3.126591  | 1.327927  | 3.308354  |
| H  | 1.641729  | 1.484670  | 2.336606  |
| H  | 5.008943  | -0.258243 | 2.504200  |
| H  | 4.859210  | -1.085459 | 0.945613  |
| H  | 5.072542  | 0.676714  | 1.005519  |
| H  | 4.231213  | -0.719355 | -2.287353 |
| H  | 4.804449  | 0.895028  | -2.719072 |
| H  | 5.128754  | 0.247979  | -1.105435 |
| H  | 1.131991  | 1.464583  | -2.305184 |
| H  | 2.513111  | 1.579065  | -3.435739 |
| H  | 1.835941  | -0.002595 | -3.005716 |
| H  | 3.691434  | 2.976842  | -1.801161 |
| H  | 2.407456  | 2.845443  | -0.588736 |
| H  | 4.085926  | 2.417339  | -0.170364 |
| C  | 0.162651  | 3.906504  | 0.960447  |
| O  | 0.028426  | 3.582872  | 2.073863  |
| O  | 0.302739  | 4.312795  | -0.124018 |
| N  | -0.014075 | -1.895694 | 0.048941  |
| Co | -0.014411 | 0.050080  | 0.021224  |

74

7,Co-(H)-formate el energy= -1304.57153757

|   |           |           |          |
|---|-----------|-----------|----------|
| H | 0.288718  | 1.745409  | 0.352048 |
| C | -1.138510 | -2.474652 | 0.252679 |
| C | -2.328900 | -1.672117 | 0.692994 |

|   |           |           |           |
|---|-----------|-----------|-----------|
| C | -1.206104 | -3.866391 | 0.204717  |
| H | -2.146836 | -4.356162 | 0.440640  |
| C | -0.071777 | -4.605545 | -0.118925 |
| H | -0.102808 | -5.691602 | -0.153633 |
| C | 1.106515  | -3.913629 | -0.386399 |
| H | 2.022165  | -4.442003 | -0.637669 |
| C | 1.119367  | -2.520272 | -0.350537 |
| C | 2.381330  | -1.768403 | -0.679462 |
| P | -2.183580 | 0.100059  | 0.106498  |
| P | 2.237920  | -0.001970 | -0.084941 |
| C | -3.230692 | 1.022296  | 1.409244  |
| C | -2.267669 | 1.252931  | 2.593514  |
| C | -4.453358 | 0.214058  | 1.883656  |
| C | -3.706708 | 2.389949  | 0.888421  |
| C | -3.015797 | 0.097104  | -1.605604 |
| C | -4.512040 | -0.245926 | -1.582082 |
| C | -2.789421 | 1.472505  | -2.263658 |
| C | -2.262214 | -0.958510 | -2.440837 |
| C | 3.036255  | 0.003074  | 1.643430  |
| C | 2.354758  | -1.138307 | 2.426193  |
| C | 2.666741  | 1.334115  | 2.328337  |
| C | 4.556834  | -0.202187 | 1.662812  |
| C | 3.273547  | 0.938591  | -1.374754 |
| C | 4.613386  | 0.257441  | -1.706265 |
| C | 2.392855  | 0.985049  | -2.642657 |
| C | 3.523904  | 2.382001  | -0.905118 |
| H | -3.265160 | -2.168943 | 0.413457  |
| H | -2.313886 | -1.617347 | 1.789169  |
| H | 2.488168  | -1.719178 | -1.770108 |
| H | 3.262981  | -2.300126 | -0.301754 |
| H | -2.822783 | 1.706975  | 3.427082  |
| H | -1.828545 | 0.314763  | 2.959748  |
| H | -1.461189 | 1.932447  | 2.301219  |
| H | -5.139953 | -0.029616 | 1.066828  |
| H | -4.173876 | -0.719448 | 2.385009  |
| H | -5.010856 | 0.816268  | 2.614443  |
| H | -4.471560 | 2.288601  | 0.110747  |
| H | -4.162530 | 2.939742  | 1.724132  |
| H | -2.876317 | 2.994553  | 0.514835  |
| H | -4.885109 | -0.320049 | -2.613659 |
| H | -4.712137 | -1.207976 | -1.092989 |
| H | -5.102317 | 0.524886  | -1.076751 |
| H | -3.351143 | 2.268308  | -1.767034 |
| H | -1.732826 | 1.758990  | -2.254189 |
| H | -3.128599 | 1.428885  | -3.308675 |

|    |           |           |           |
|----|-----------|-----------|-----------|
| H  | -2.406982 | -1.977262 | -2.061277 |
| H  | -1.186255 | -0.750203 | -2.459802 |
| H  | -2.636754 | -0.932110 | -3.473478 |
| H  | 2.683904  | -1.103470 | 3.473916  |
| H  | 1.263892  | -1.032367 | 2.404004  |
| H  | 2.611285  | -2.128854 | 2.031233  |
| H  | 3.112932  | 2.199782  | 1.829588  |
| H  | 3.028991  | 1.322585  | 3.366086  |
| H  | 1.581258  | 1.481217  | 2.342127  |
| H  | 4.898899  | -0.306622 | 2.702484  |
| H  | 4.860534  | -1.109308 | 1.124857  |
| H  | 5.090320  | 0.649548  | 1.228669  |
| H  | 4.481951  | -0.769196 | -2.068328 |
| H  | 5.106213  | 0.821845  | -2.510245 |
| H  | 5.299244  | 0.232754  | -0.855371 |
| H  | 1.463793  | 1.528473  | -2.446730 |
| H  | 2.944511  | 1.507019  | -3.437657 |
| H  | 2.151387  | -0.017766 | -3.019846 |
| H  | 4.014861  | 2.938645  | -1.715520 |
| H  | 2.585230  | 2.895919  | -0.679269 |
| H  | 4.185096  | 2.424361  | -0.032421 |
| C  | -0.134309 | 2.795561  | -0.158169 |
| O  | -0.685572 | 3.465506  | 0.706778  |
| O  | 0.163952  | 2.918104  | -1.344304 |
| N  | 0.005802  | -1.791057 | -0.042615 |
| Co | 0.045628  | 0.156867  | 0.021270  |

74

7, Co-(O)-formate-isomer el energy= -1304.59825933

|   |           |           |           |
|---|-----------|-----------|-----------|
| P | -2.199471 | -0.159177 | 0.058123  |
| P | 2.217916  | 0.071005  | -0.005947 |
| O | 0.316206  | -2.027410 | 0.490666  |
| O | 0.444275  | -4.220822 | 0.044899  |
| C | -3.184268 | -1.152200 | 1.355464  |
| C | -2.223052 | -1.288076 | 2.556474  |
| C | -3.508383 | -2.561338 | 0.829855  |
| C | -4.482673 | -0.467799 | 1.818320  |
| C | -3.079309 | -0.139580 | -1.636490 |
| C | -2.735190 | -1.443613 | -2.379759 |
| C | -4.601412 | 0.047757  | -1.568831 |
| C | -2.460713 | 1.027461  | -2.433251 |
| C | -2.396710 | 1.600885  | 0.670805  |
| C | -1.230643 | 2.427375  | 0.201715  |
| C | -1.331101 | 3.814284  | 0.112439  |
| C | -0.224482 | 4.566917  | -0.273418 |



|   |           |           |           |
|---|-----------|-----------|-----------|
| C | 0.959458  | 3.890851  | -0.560946 |
| C | 1.008273  | 2.501134  | -0.473813 |
| C | 2.276231  | 1.758077  | -0.809911 |
| C | 3.242484  | -1.018487 | -1.177118 |
| C | 2.317069  | -1.304085 | -2.378932 |
| C | 4.527459  | -0.340874 | -1.685076 |
| C | 3.587302  | -2.354832 | -0.493808 |
| C | 3.057803  | 0.295535  | 1.685479  |
| C | 2.313989  | 1.464611  | 2.364690  |
| C | 2.801709  | -0.977462 | 2.517787  |
| C | 4.558589  | 0.611254  | 1.631617  |
| C | -0.023594 | -3.105657 | -0.138501 |
| H | -1.302746 | -1.804332 | 2.267752  |
| H | -2.720614 | -1.857475 | 3.354547  |
| H | -1.945360 | -0.310968 | 2.973596  |
| H | -4.251041 | -2.541692 | 0.024705  |
| H | -3.929207 | -3.161178 | 1.648760  |
| H | -2.615958 | -3.080528 | 0.468236  |
| H | -4.953669 | -1.084305 | 2.597133  |
| H | -5.209203 | -0.348880 | 1.009644  |
| H | -4.297426 | 0.519123  | 2.257704  |
| H | -1.649831 | -1.562815 | -2.470533 |
| H | -3.162439 | -1.411723 | -3.392224 |
| H | -3.130742 | -2.332484 | -1.879506 |
| H | -4.883106 | 0.944992  | -1.003578 |
| H | -5.103166 | -0.813723 | -1.116851 |
| H | -5.001981 | 0.162604  | -2.586461 |
| H | -2.833650 | 0.993858  | -3.466403 |
| H | -1.367670 | 0.953025  | -2.460249 |
| H | -2.726092 | 2.006158  | -2.017729 |
| H | -3.349348 | 2.076440  | 0.407809  |
| H | -2.363335 | 1.535789  | 1.766121  |
| H | -2.275356 | 4.291523  | 0.360679  |
| H | -0.281193 | 5.650160  | -0.343284 |
| H | 1.852845  | 4.430235  | -0.864100 |
| H | 3.159259  | 2.360458  | -0.564404 |
| H | 2.305507  | 1.578132  | -1.892642 |
| H | 2.010106  | -0.385485 | -2.895963 |
| H | 1.413088  | -1.832076 | -2.064451 |
| H | 2.851610  | -1.931143 | -3.106303 |
| H | 4.319869  | 0.589063  | -2.228584 |
| H | 5.038621  | -1.018067 | -2.384084 |
| H | 5.228439  | -0.112318 | -0.877472 |
| H | 3.999283  | -3.042545 | -1.245738 |
| H | 2.708974  | -2.831622 | -0.047174 |

|    |           |           |           |
|----|-----------|-----------|-----------|
| H  | 4.352274  | -2.225318 | 0.280054  |
| H  | 2.474992  | 2.420883  | 1.852474  |
| H  | 2.680843  | 1.573811  | 3.394643  |
| H  | 1.234993  | 1.274814  | 2.402139  |
| H  | 3.078927  | -0.786389 | 3.564446  |
| H  | 3.392499  | -1.827522 | 2.166376  |
| H  | 1.749123  | -1.274638 | 2.475295  |
| H  | 4.923246  | 0.838015  | 2.644047  |
| H  | 4.777847  | 1.483001  | 1.001204  |
| H  | 5.141051  | -0.237412 | 1.258955  |
| H  | -0.812229 | -2.960750 | -0.916373 |
| N  | -0.077645 | 1.758089  | -0.098782 |
| Co | 0.022768  | -0.179473 | 0.076850  |

74

7, Co-(O)-formate el energy= -1304.60880069

|   |           |           |           |
|---|-----------|-----------|-----------|
| P | -2.203969 | -0.193600 | 0.096424  |
| P | 2.213952  | 0.073386  | 0.038121  |
| O | 0.267779  | -2.002949 | 0.846815  |
| O | -0.403832 | -3.207097 | -0.950165 |
| C | -3.273656 | -1.182345 | 1.324828  |
| C | -2.405503 | -1.316889 | 2.594785  |
| C | -3.559169 | -2.586343 | 0.761577  |
| C | -4.600496 | -0.499029 | 1.700251  |
| C | -2.972440 | -0.165230 | -1.652446 |
| C | -2.743144 | -1.528485 | -2.332584 |
| C | -4.464738 | 0.194760  | -1.685649 |
| C | -2.176447 | 0.894509  | -2.443017 |
| C | -2.429133 | 1.564828  | 0.710477  |
| C | -1.257237 | 2.400338  | 0.275276  |
| C | -1.364920 | 3.787816  | 0.192195  |
| C | -0.263814 | 4.549328  | -0.191029 |
| C | 0.920673  | 3.880878  | -0.494596 |
| C | 0.976330  | 2.491532  | -0.412236 |
| C | 2.232913  | 1.750562  | -0.786120 |
| C | 3.166378  | -1.022026 | -1.189256 |
| C | 2.164666  | -1.322102 | -2.325999 |
| C | 4.419770  | -0.354376 | -1.781068 |
| C | 3.553519  | -2.347402 | -0.509841 |
| C | 3.162684  | 0.324523  | 1.669715  |
| C | 2.446542  | 1.493129  | 2.379087  |
| C | 2.975119  | -0.939944 | 2.532578  |
| C | 4.653276  | 0.655072  | 1.518527  |
| C | -0.002954 | -3.083979 | 0.208946  |
| H | -1.463678 | -1.829389 | 2.381564  |

|    |           |           |           |
|----|-----------|-----------|-----------|
| H  | -2.963869 | -1.883546 | 3.354002  |
| H  | -2.161295 | -0.338615 | 3.029988  |
| H  | -4.331879 | -2.557239 | -0.014571 |
| H  | -3.930913 | -3.231433 | 1.570231  |
| H  | -2.667380 | -3.054079 | 0.333021  |
| H  | -5.135002 | -1.128164 | 2.426565  |
| H  | -5.260446 | -0.356744 | 0.840050  |
| H  | -4.443184 | 0.477359  | 2.173508  |
| H  | -1.719678 | -1.887667 | -2.190542 |
| H  | -2.947101 | -1.429222 | -3.408615 |
| H  | -3.413894 | -2.299368 | -1.942270 |
| H  | -4.684756 | 1.136869  | -1.167523 |
| H  | -5.083347 | -0.593260 | -1.244177 |
| H  | -4.786654 | 0.313129  | -2.730443 |
| H  | -2.515518 | 0.886340  | -3.488161 |
| H  | -1.103628 | 0.672475  | -2.426465 |
| H  | -2.321954 | 1.909378  | -2.055122 |
| H  | -3.374289 | 2.040695  | 0.422582  |
| H  | -2.428502 | 1.492749  | 1.806018  |
| H  | -2.313418 | 4.257352  | 0.438785  |
| H  | -0.327004 | 5.632656  | -0.254330 |
| H  | 1.806748  | 4.425513  | -0.809649 |
| H  | 3.124308  | 2.354891  | -0.579851 |
| H  | 2.220779  | 1.560477  | -1.867278 |
| H  | 1.820042  | -0.405106 | -2.822184 |
| H  | 1.284314  | -1.863370 | -1.964775 |
| H  | 2.664630  | -1.937537 | -3.088145 |
| H  | 4.178865  | 0.566161  | -2.326108 |
| H  | 4.888507  | -1.041953 | -2.499552 |
| H  | 5.167835  | -0.112394 | -1.020707 |
| H  | 3.881210  | -3.065083 | -1.274559 |
| H  | 2.707077  | -2.786798 | 0.026230  |
| H  | 4.381903  | -2.216416 | 0.195549  |
| H  | 2.568912  | 2.444880  | 1.848401  |
| H  | 2.868904  | 1.617624  | 3.385900  |
| H  | 1.372840  | 1.293873  | 2.477614  |
| H  | 3.302031  | -0.729508 | 3.561029  |
| H  | 3.569257  | -1.781061 | 2.163203  |
| H  | 1.926896  | -1.256383 | 2.549830  |
| H  | 5.079115  | 0.899803  | 2.502588  |
| H  | 4.822721  | 1.519721  | 0.863820  |
| H  | 5.220725  | -0.192445 | 1.120197  |
| H  | 0.163942  | -3.995731 | 0.828126  |
| N  | -0.096790 | 1.741017  | -0.018047 |
| Co | 0.031392  | -0.188268 | 0.221487  |

74

7, TS-2-3      el energy= -1304.56595942

|   |           |           |           |
|---|-----------|-----------|-----------|
| H | -0.000015 | 1.645187  | 0.000078  |
| C | -1.135940 | -2.563943 | 0.281690  |
| C | -2.366862 | -1.775767 | 0.647343  |
| C | -1.162782 | -3.957040 | 0.274453  |
| H | -2.094664 | -4.468116 | 0.502016  |
| C | 0.000094  | -4.674357 | -0.000169 |
| H | 0.000114  | -5.761416 | -0.000209 |
| C | 1.162944  | -3.956977 | -0.274736 |
| H | 2.094845  | -4.468003 | -0.502336 |
| C | 1.136053  | -2.563881 | -0.281870 |
| C | 2.366947  | -1.775634 | -0.647461 |
| P | -2.166250 | -0.001259 | 0.067424  |
| P | 2.166268  | -0.001176 | -0.067411 |
| C | -3.187589 | 0.960908  | 1.358143  |
| C | -2.250743 | 1.091147  | 2.577812  |
| C | -4.488047 | 0.255161  | 1.782098  |
| C | -3.520778 | 2.372666  | 0.848021  |
| C | -2.992347 | 0.033529  | -1.649146 |
| C | -4.510718 | -0.187970 | -1.651142 |
| C | -2.639874 | 1.377605  | -2.316832 |
| C | -2.311115 | -1.089042 | -2.459102 |
| C | 2.992362  | 0.033517  | 1.649162  |
| C | 2.311174  | -1.089141 | 2.459034  |
| C | 2.639835  | 1.377530  | 2.316947  |
| C | 4.510742  | -0.187921 | 1.651144  |
| C | 3.187569  | 0.961125  | -1.358059 |
| C | 4.488061  | 0.255466  | -1.782058 |
| C | 2.250723  | 1.091408  | -2.577723 |
| C | 3.520692  | 2.372861  | -0.847834 |
| H | -3.277420 | -2.277182 | 0.296408  |
| H | -2.435925 | -1.728506 | 1.741807  |
| H | 2.436013  | -1.728290 | -1.741921 |
| H | 3.277522  | -2.277041 | -0.296558 |
| H | -2.775254 | 1.621142  | 3.386135  |
| H | -1.943516 | 0.111975  | 2.968009  |
| H | -1.348850 | 1.653066  | 2.318118  |
| H | -5.184517 | 0.122164  | 0.948970  |
| H | -4.301493 | -0.728068 | 2.228734  |
| H | -4.996093 | 0.864211  | 2.543494  |
| H | -4.257710 | 2.355197  | 0.037962  |
| H | -3.950622 | 2.960169  | 1.671474  |
| H | -2.628174 | 2.900895  | 0.503120  |

|    |           |           |           |
|----|-----------|-----------|-----------|
| H  | -4.872021 | -0.259916 | -2.687414 |
| H  | -4.792606 | -1.118073 | -1.141080 |
| H  | -5.048498 | 0.639079  | -1.176091 |
| H  | -3.137500 | 2.225415  | -1.836648 |
| H  | -1.560650 | 1.561283  | -2.281228 |
| H  | -2.957740 | 1.358454  | -3.369298 |
| H  | -2.544698 | -2.087087 | -2.069304 |
| H  | -1.221588 | -0.968600 | -2.453486 |
| H  | -2.661032 | -1.047685 | -3.500178 |
| H  | 2.661088  | -1.047849 | 3.500113  |
| H  | 1.221642  | -0.968741 | 2.453427  |
| H  | 2.544794  | -2.087148 | 2.069161  |
| H  | 3.137434  | 2.225394  | 1.836832  |
| H  | 2.957693  | 1.358310  | 3.369415  |
| H  | 1.560604  | 1.561170  | 2.281349  |
| H  | 4.872046  | -0.259931 | 2.687411  |
| H  | 4.792668  | -1.117974 | 1.141013  |
| H  | 5.048489  | 0.639186  | 1.176156  |
| H  | 4.301551  | -0.727740 | -2.228762 |
| H  | 4.996081  | 0.864591  | -2.543412 |
| H  | 5.184534  | 0.122443  | -0.948938 |
| H  | 1.348804  | 1.653269  | -2.317995 |
| H  | 2.775215  | 1.621482  | -3.386006 |
| H  | 1.943542  | 0.112249  | -2.967990 |
| H  | 3.950506  | 2.960446  | -1.671245 |
| H  | 2.628063  | 2.901022  | -0.502892 |
| H  | 4.257626  | 2.355369  | -0.037778 |
| C  | -0.000075 | 3.404042  | 0.000102  |
| O  | -0.223217 | 3.630367  | 1.140067  |
| O  | 0.223051  | 3.630420  | -1.139855 |
| N  | 0.000043  | -1.855011 | -0.000064 |
| Co | 0.000008  | 0.093166  | 0.000010  |

74

7, TS-3-4i el energy= -1304.57028629

|   |           |           |           |
|---|-----------|-----------|-----------|
| H | -0.204697 | -1.778768 | 0.799672  |
| C | 1.031045  | 2.468875  | 0.326429  |
| C | 2.253485  | 1.716353  | 0.764104  |
| C | 1.041929  | 3.860946  | 0.291208  |
| H | 1.962500  | 4.383111  | 0.537621  |
| C | -0.117355 | 4.561545  | -0.032720 |
| H | -0.129292 | 5.647922  | -0.058432 |
| C | -1.263503 | 3.821465  | -0.310656 |
| H | -2.199909 | 4.312091  | -0.562846 |
| C | -1.222320 | 2.429434  | -0.285711 |

|   |           |           |           |
|---|-----------|-----------|-----------|
| C | -2.455779 | 1.637988  | -0.625791 |
| P | 2.203511  | -0.035237 | 0.122427  |
| P | -2.259149 | -0.121066 | -0.038467 |
| C | 3.295791  | -0.948128 | 1.395314  |
| C | 2.369801  | -1.251951 | 2.592968  |
| C | 4.486913  | -0.095605 | 1.873795  |
| C | 3.821904  | -2.280748 | 0.833533  |
| C | 3.025696  | 0.047633  | -1.591679 |
| C | 4.497247  | 0.484650  | -1.567844 |
| C | 2.884126  | -1.326502 | -2.277695 |
| C | 2.201987  | 1.070027  | -2.402407 |
| C | -3.056391 | -0.132700 | 1.694733  |
| C | -2.387523 | 1.020365  | 2.471902  |
| C | -2.688480 | -1.451999 | 2.400527  |
| C | -4.579207 | 0.059582  | 1.709301  |
| C | -3.277037 | -1.087871 | -1.324831 |
| C | -4.667096 | -0.486867 | -1.599283 |
| C | -2.448175 | -1.049547 | -2.627727 |
| C | -3.414321 | -2.553630 | -0.878299 |
| H | 3.167651  | 2.266968  | 0.515095  |
| H | 2.224089  | 1.623205  | 1.857886  |
| H | -2.557654 | 1.589328  | -1.716931 |
| H | -3.356345 | 2.136531  | -0.248037 |
| H | 2.973906  | -1.654878 | 3.418537  |
| H | 1.857424  | -0.354033 | 2.963687  |
| H | 1.619348  | -1.999388 | 2.320341  |
| H | 5.148582  | 0.203011  | 1.055024  |
| H | 4.169468  | 0.809474  | 2.404013  |
| H | 5.083235  | -0.689686 | 2.580109  |
| H | 4.580803  | -2.126277 | 0.058897  |
| H | 4.299347  | -2.838140 | 1.651888  |
| H | 3.014479  | -2.905232 | 0.440420  |
| H | 4.858151  | 0.600798  | -2.599868 |
| H | 4.639965  | 1.448306  | -1.061979 |
| H | 5.137646  | -0.257521 | -1.080763 |
| H | 3.531832  | -2.082527 | -1.825658 |
| H | 1.855205  | -1.697508 | -2.229368 |
| H | 3.176715  | -1.228085 | -3.333111 |
| H | 2.278387  | 2.087114  | -1.999536 |
| H | 1.142714  | 0.790160  | -2.427062 |
| H | 2.577477  | 1.091946  | -3.434779 |
| H | -2.707506 | 0.978514  | 3.522205  |
| H | -1.295385 | 0.933315  | 2.439523  |
| H | -2.664836 | 2.006202  | 2.080196  |
| H | -3.091848 | -2.331005 | 1.888710  |

|    |           |           |           |
|----|-----------|-----------|-----------|
| H  | -3.097619 | -1.442384 | 3.420605  |
| H  | -1.602528 | -1.573936 | 2.469898  |
| H  | -4.918416 | 0.200469  | 2.745491  |
| H  | -4.895787 | 0.941034  | 1.137747  |
| H  | -5.104008 | -0.815024 | 1.311769  |
| H  | -4.614011 | 0.567168  | -1.897881 |
| H  | -5.128692 | -1.035384 | -2.432335 |
| H  | -5.341528 | -0.564666 | -0.743294 |
| H  | -1.458720 | -1.484168 | -2.469216 |
| H  | -2.976308 | -1.632378 | -3.395677 |
| H  | -2.334556 | -0.030048 | -3.018984 |
| H  | -3.888612 | -3.131140 | -1.684015 |
| H  | -2.434201 | -2.998698 | -0.683217 |
| H  | -4.045183 | -2.656268 | 0.011872  |
| C  | 0.232656  | -2.597845 | 0.040983  |
| O  | 0.814825  | -3.502232 | 0.633344  |
| O  | -0.014472 | -2.372714 | -1.166538 |
| Co | -0.035671 | -0.204033 | 0.029395  |
| N  | -0.082718 | 1.733285  | 0.019469  |

74

7, TS-4i-4      el energy= -1304.59524855

|   |           |           |           |
|---|-----------|-----------|-----------|
| P | -2.242644 | -0.110841 | 0.092473  |
| P | 2.201802  | 0.002275  | -0.042757 |
| O | 0.021239  | -2.082141 | 0.510579  |
| O | 1.002733  | -3.752601 | -0.654496 |
| C | -3.219144 | -1.020035 | 1.451704  |
| C | -2.263812 | -1.050279 | 2.664391  |
| C | -3.503332 | -2.470233 | 1.028301  |
| C | -4.535323 | -0.329375 | 1.849006  |
| C | -3.098049 | -0.229581 | -1.605894 |
| C | -2.715622 | -1.581130 | -2.238962 |
| C | -4.623371 | -0.063744 | -1.576586 |
| C | -2.479605 | 0.886815  | -2.472517 |
| C | -2.443091 | 1.679989  | 0.580531  |
| C | -1.235218 | 2.459086  | 0.132834  |
| C | -1.301053 | 3.847526  | 0.035689  |
| C | -0.165437 | 4.576750  | -0.306625 |
| C | 1.011190  | 3.872715  | -0.547315 |
| C | 1.023361  | 2.481367  | -0.462026 |
| C | 2.281661  | 1.720923  | -0.774485 |
| C | 3.354915  | -0.962818 | -1.215420 |
| C | 2.486079  | -1.302300 | -2.445054 |
| C | 4.580242  | -0.145190 | -1.666360 |
| C | 3.826251  | -2.276685 | -0.569272 |

|   |           |           |           |
|---|-----------|-----------|-----------|
| C | 2.956216  | 0.172425  | 1.696924  |
| C | 2.129928  | 1.264930  | 2.407030  |
| C | 2.722915  | -1.158645 | 2.441076  |
| C | 4.440793  | 0.558963  | 1.732468  |
| C | 0.030185  | -3.135342 | -0.233426 |
| H | -1.343923 | -1.585493 | 2.411498  |
| H | -2.760215 | -1.558378 | 3.503767  |
| H | -1.993003 | -0.041867 | 3.004289  |
| H | -4.236239 | -2.529801 | 0.216216  |
| H | -3.916956 | -3.021279 | 1.884667  |
| H | -2.586860 | -2.978263 | 0.715369  |
| H | -5.002127 | -0.892890 | 2.669468  |
| H | -5.255134 | -0.289704 | 1.026506  |
| H | -4.375909 | 0.693026  | 2.210931  |
| H | -1.627018 | -1.695616 | -2.283462 |
| H | -3.109580 | -1.630178 | -3.264081 |
| H | -3.120128 | -2.433879 | -1.685825 |
| H | -4.928380 | 0.867793  | -1.083113 |
| H | -5.117974 | -0.898054 | -1.068838 |
| H | -5.009758 | -0.031641 | -2.605606 |
| H | -2.837894 | 0.780402  | -3.505870 |
| H | -1.385611 | 0.820299  | -2.479402 |
| H | -2.759144 | 1.889092  | -2.127124 |
| H | -3.369216 | 2.153720  | 0.232907  |
| H | -2.475410 | 1.691006  | 1.677732  |
| H | -2.243878 | 4.344419  | 0.248310  |
| H | -0.195493 | 5.660926  | -0.378825 |
| H | 1.928550  | 4.389150  | -0.816778 |
| H | 3.168171  | 2.299248  | -0.488111 |
| H | 2.337411  | 1.577427  | -1.861495 |
| H | 2.038817  | -0.407914 | -2.899779 |
| H | 1.688359  | -1.998464 | -2.173373 |
| H | 3.114619  | -1.782784 | -3.208568 |
| H | 4.304587  | 0.749255  | -2.236966 |
| H | 5.196529  | -0.771062 | -2.326973 |
| H | 5.210639  | 0.166728  | -0.828267 |
| H | 4.359356  | -2.866965 | -1.328620 |
| H | 2.977835  | -2.875518 | -0.224457 |
| H | 4.526979  | -2.098169 | 0.253921  |
| H | 2.259403  | 2.253398  | 1.949378  |
| H | 2.454106  | 1.338068  | 3.454615  |
| H | 1.061210  | 1.020166  | 2.391488  |
| H | 2.940616  | -1.019403 | 3.509886  |
| H | 3.369989  | -1.957838 | 2.069799  |
| H | 1.687488  | -1.497279 | 2.328765  |



|    |           |           |           |
|----|-----------|-----------|-----------|
| H  | 4.753458  | 0.720747  | 2.774423  |
| H  | 4.639731  | 1.488788  | 1.183681  |
| H  | 5.079846  | -0.227140 | 1.318523  |
| H  | -0.986949 | -3.532210 | -0.483735 |
| N  | -0.088080 | 1.759257  | -0.126433 |
| Co | -0.027631 | -0.185948 | 0.056752  |

71

1, Ni-H (SMD-BS2-Opt) e1 energy= -3132.80740836

|    |           |           |           |
|----|-----------|-----------|-----------|
| Ni | 0.000000  | 0.000000  | 0.393645  |
| H  | 0.000000  | 0.000000  | 1.939878  |
| C  | 0.000000  | 0.000000  | -1.565085 |
| C  | 0.764932  | 0.933245  | -2.297358 |
| C  | 1.560839  | 1.962840  | -1.530518 |
| C  | 0.767513  | 0.927427  | -3.692562 |
| H  | 1.363679  | 1.651411  | -4.238021 |
| C  | 0.000000  | 0.000000  | -4.390102 |
| H  | 0.000000  | 0.000000  | -5.473693 |
| C  | -0.767513 | -0.927427 | -3.692562 |
| H  | -1.363679 | -1.651411 | -4.238021 |
| C  | -0.764932 | -0.933245 | -2.297358 |
| C  | -1.560839 | -1.962840 | -1.530518 |
| P  | 1.640500  | 1.416141  | 0.236919  |
| P  | -1.640500 | -1.416141 | 0.236919  |
| C  | 1.491432  | 3.011757  | 1.222652  |
| C  | 0.000000  | 3.381351  | 1.151488  |
| C  | 2.316635  | 4.173971  | 0.657408  |
| C  | 1.868153  | 2.778571  | 2.688076  |
| C  | 3.329687  | 0.603694  | 0.421489  |
| C  | 4.498625  | 1.585608  | 0.320616  |
| C  | 3.395303  | -0.149878 | 1.756556  |
| C  | 3.442942  | -0.432080 | -0.708827 |
| C  | -3.329687 | -0.603694 | 0.421489  |
| C  | -3.442942 | 0.432080  | -0.708827 |
| C  | -3.395303 | 0.149878  | 1.756556  |
| C  | -4.498625 | -1.585608 | 0.320616  |
| C  | -1.491432 | -3.011757 | 1.222652  |
| C  | -2.316635 | -4.173971 | 0.657408  |
| C  | 0.000000  | -3.381351 | 1.151488  |
| C  | -1.868153 | -2.778571 | 2.688076  |
| H  | 2.549329  | 2.139459  | -1.958296 |
| H  | 1.039989  | 2.922405  | -1.552910 |
| H  | -1.039989 | -2.922405 | -1.552910 |
| H  | -2.549329 | -2.139459 | -1.958296 |
| H  | -0.163876 | 4.317113  | 1.693324  |

|   |           |           |           |
|---|-----------|-----------|-----------|
| H | -0.340014 | 3.528379  | 0.124742  |
| H | -0.618894 | 2.607167  | 1.605392  |
| H | 3.386923  | 3.987427  | 0.705224  |
| H | 2.055089  | 4.399143  | -0.376510 |
| H | 2.111102  | 5.071423  | 1.248374  |
| H | 2.939423  | 2.622741  | 2.810595  |
| H | 1.592857  | 3.661410  | 3.272057  |
| H | 1.340917  | 1.920525  | 3.106126  |
| H | 5.437318  | 1.023590  | 0.309272  |
| H | 4.458993  | 2.178829  | -0.594144 |
| H | 4.532774  | 2.264585  | 1.171597  |
| H | 3.344220  | 0.515960  | 2.615580  |
| H | 2.583616  | -0.872075 | 1.841392  |
| H | 4.343720  | -0.692298 | 1.810699  |
| H | 3.459828  | 0.029211  | -1.695898 |
| H | 2.619865  | -1.146262 | -0.681970 |
| H | 4.378309  | -0.984122 | -0.583085 |
| H | -4.378309 | 0.984122  | -0.583085 |
| H | -2.619865 | 1.146262  | -0.681970 |
| H | -3.459828 | -0.029211 | -1.695898 |
| H | -3.344220 | -0.515960 | 2.615580  |
| H | -4.343720 | 0.692298  | 1.810699  |
| H | -2.583616 | 0.872075  | 1.841392  |
| H | -5.437318 | -1.023590 | 0.309272  |
| H | -4.458993 | -2.178829 | -0.594144 |
| H | -4.532774 | -2.264585 | 1.171597  |
| H | -2.111102 | -5.071423 | 1.248374  |
| H | -3.386923 | -3.987427 | 0.705224  |
| H | -2.055089 | -4.399143 | -0.376510 |
| H | 0.618894  | -2.607167 | 1.605392  |
| H | 0.163876  | -4.317113 | 1.693324  |
| H | 0.340014  | -3.528379 | 0.124742  |
| H | -1.592857 | -3.661410 | 3.272057  |
| H | -1.340917 | -1.920525 | 3.106126  |
| H | -2.939423 | -2.622741 | 2.810595  |

74

1, Ni-(O)-formate (SMD-BS2-Opt) el energy= -3321.51193555

|    |           |           |           |
|----|-----------|-----------|-----------|
| Ni | 0.012768  | -0.200556 | 0.059444  |
| P  | -2.219814 | -0.014588 | 0.092275  |
| P  | 2.234400  | 0.010026  | -0.035210 |
| O  | 0.050246  | -2.087619 | 0.558583  |
| O  | -0.079080 | -3.285350 | -1.353569 |
| C  | -3.146055 | -0.940010 | 1.445178  |
| C  | -2.206952 | -0.921531 | 2.663498  |

|   |           |           |           |
|---|-----------|-----------|-----------|
| C | -3.414329 | -2.393986 | 1.045643  |
| C | -4.471081 | -0.270503 | 1.833301  |
| C | -3.037552 | -0.176180 | -1.596222 |
| C | -2.745594 | -1.558891 | -2.189410 |
| C | -4.548920 | 0.064688  | -1.563107 |
| C | -2.381033 | 0.876940  | -2.503166 |
| C | -2.419384 | 1.754251  | 0.549762  |
| C | -1.170603 | 2.479011  | 0.127016  |
| C | -1.179500 | 3.869290  | 0.017432  |
| C | -0.023888 | 4.555543  | -0.333107 |
| C | 1.145064  | 3.844027  | -0.570772 |
| C | 1.159563  | 2.452877  | -0.470806 |
| C | -0.001934 | 1.728961  | -0.126234 |
| C | 2.434572  | 1.698167  | -0.732294 |
| C | 3.207268  | -1.081034 | -1.218610 |
| C | 2.310341  | -1.229996 | -2.459124 |
| C | 4.542289  | -0.457593 | -1.647917 |
| C | 3.470939  | -2.464406 | -0.616626 |
| C | 2.993264  | 0.075340  | 1.685535  |
| C | 2.331939  | 1.255637  | 2.415038  |
| C | 2.642347  | -1.208484 | 2.449607  |
| C | 4.509941  | 0.279210  | 1.679355  |
| C | -0.012038 | -3.158139 | -0.132595 |
| H | -1.290001 | -1.471527 | 2.459873  |
| H | -2.715614 | -1.390845 | 3.510283  |
| H | -1.941322 | 0.094874  | 2.961129  |
| H | -4.179986 | -2.466052 | 0.274605  |
| H | -3.776181 | -2.939261 | 1.921939  |
| H | -2.515380 | -2.894058 | 0.690517  |
| H | -4.919759 | -0.838980 | 2.653248  |
| H | -5.186477 | -0.254573 | 1.014437  |
| H | -4.330501 | 0.751309  | 2.185340  |
| H | -1.682041 | -1.791345 | -2.182248 |
| H | -3.098415 | -1.576354 | -3.224865 |
| H | -3.259628 | -2.354994 | -1.654592 |
| H | -4.808357 | 1.019198  | -1.103297 |
| H | -5.074065 | -0.729492 | -1.034633 |
| H | -4.924966 | 0.080947  | -2.590285 |
| H | -2.791175 | 0.767065  | -3.510521 |
| H | -1.300976 | 0.742148  | -2.560040 |
| H | -2.579315 | 1.895727  | -2.171777 |
| H | -3.325740 | 2.199152  | 0.137243  |
| H | -2.515951 | 1.795484  | 1.636641  |
| H | -2.095529 | 4.415888  | 0.212816  |
| H | -0.032949 | 5.635625  | -0.415483 |

|   |          |           |           |
|---|----------|-----------|-----------|
| H | 2.055073 | 4.371342  | -0.835114 |
| H | 3.313052 | 2.212041  | -0.339338 |
| H | 2.589840 | 1.590262  | -1.807367 |
| H | 2.056078 | -0.263244 | -2.898416 |
| H | 1.388624 | -1.760195 | -2.223823 |
| H | 2.851237 | -1.803096 | -3.217933 |
| H | 4.409190 | 0.503530  | -2.144006 |
| H | 5.021344 | -1.130210 | -2.365312 |
| H | 5.229444 | -0.321085 | -0.816257 |
| H | 3.864707 | -3.120122 | -1.397998 |
| H | 2.565621 | -2.922930 | -0.225003 |
| H | 4.210964 | -2.420875 | 0.181741  |
| H | 2.568496 | 2.214601  | 1.954775  |
| H | 2.701965 | 1.277954  | 3.443501  |
| H | 1.247244 | 1.152982  | 2.446243  |
| H | 2.985512 | -1.106371 | 3.483056  |
| H | 3.123178 | -2.087898 | 2.026099  |
| H | 1.568264 | -1.387056 | 2.457627  |
| H | 4.850345 | 0.435431  | 2.707249  |
| H | 4.806330 | 1.153580  | 1.098190  |
| H | 5.035582 | -0.590944 | 1.289274  |
| H | 0.002894 | -4.071249 | 0.499976  |

74

1, TS-2-3 (SMD-BS2-0pt) el energy= -3321.47989815

|    |           |           |           |
|----|-----------|-----------|-----------|
| Ni | -0.000020 | 0.107128  | 0.000048  |
| H  | -0.000111 | 1.682687  | 0.000136  |
| C  | 0.000029  | -1.841297 | -0.000026 |
| C  | -1.172184 | -2.571661 | 0.282468  |
| C  | -2.428846 | -1.807303 | 0.612020  |
| C  | -1.170113 | -3.966566 | 0.277424  |
| H  | -2.083621 | -4.509490 | 0.494745  |
| C  | 0.000121  | -4.664600 | -0.000066 |
| H  | 0.000158  | -5.748029 | -0.000076 |
| C  | 1.170307  | -3.966482 | -0.277548 |
| H  | 2.083850  | -4.509340 | -0.494888 |
| C  | 1.172285  | -2.571577 | -0.282558 |
| C  | 2.428881  | -1.807125 | -0.612138 |
| P  | -2.183820 | -0.061847 | 0.059919  |
| P  | 2.183804  | -0.061712 | -0.059916 |
| C  | -3.118964 | 0.960627  | 1.333267  |
| C  | -2.182443 | 1.029067  | 2.551368  |
| C  | -4.449515 | 0.327440  | 1.759779  |
| C  | -3.380561 | 2.382717  | 0.830218  |
| C  | -2.960296 | 0.027453  | -1.651557 |

|   |           |           |           |
|---|-----------|-----------|-----------|
| C | -4.483313 | -0.121302 | -1.641176 |
| C | -2.562892 | 1.350543  | -2.318209 |
| C | -2.353007 | -1.118121 | -2.476810 |
| C | 2.960368  | 0.027504  | 1.651521  |
| C | 2.353107  | -1.118102 | 2.476749  |
| C | 2.563013  | 1.350567  | 2.318253  |
| C | 4.483384  | -0.121256 | 1.641061  |
| C | 3.118851  | 0.960876  | -1.333254 |
| C | 4.449350  | 0.327703  | -1.759954 |
| C | 2.182206  | 1.029444  | -2.551253 |
| C | 3.380540  | 2.382916  | -0.830109 |
| H | -3.324378 | -2.259637 | 0.183022  |
| H | -2.576297 | -1.789793 | 1.693916  |
| H | 2.576249  | -1.789537 | -1.694045 |
| H | 3.324469  | -2.259439 | -0.183234 |
| H | -2.683603 | 1.570208  | 3.358762  |
| H | -1.924681 | 0.037026  | 2.926813  |
| H | -1.258071 | 1.552861  | 2.310577  |
| H | -5.153554 | 0.243865  | 0.934667  |
| H | -4.314862 | -0.661828 | 2.195933  |
| H | -4.909129 | 0.960980  | 2.523900  |
| H | -4.142900 | 2.405511  | 0.052842  |
| H | -3.738089 | 2.992963  | 1.664003  |
| H | -2.480710 | 2.853803  | 0.440902  |
| H | -4.842324 | -0.172285 | -2.673296 |
| H | -4.802299 | -1.034604 | -1.136649 |
| H | -4.973950 | 0.725798  | -1.164523 |
| H | -2.992521 | 2.215665  | -1.818416 |
| H | -1.480917 | 1.476487  | -2.335371 |
| H | -2.923743 | 1.348879  | -3.350740 |
| H | -2.625566 | -2.099460 | -2.089588 |
| H | -1.265412 | -1.057185 | -2.511258 |
| H | -2.731564 | -1.045553 | -3.499894 |
| H | 2.731703  | -1.045579 | 3.499822  |
| H | 1.265512  | -1.057160 | 2.511241  |
| H | 2.625644  | -2.099425 | 2.089474  |
| H | 2.992639  | 2.215703  | 1.818483  |
| H | 2.923911  | 1.348848  | 3.350768  |
| H | 1.481043  | 1.476534  | 2.335473  |
| H | 4.842441  | -0.172308 | 2.673162  |
| H | 4.802350  | -1.034522 | 1.136459  |
| H | 4.973999  | 0.725880  | 1.164448  |
| H | 4.314638  | -0.661506 | -2.196222 |
| H | 4.908917  | 0.961327  | -2.524034 |
| H | 5.153457  | 0.244007  | -0.934912 |

|   |           |          |           |
|---|-----------|----------|-----------|
| H | 1.257873  | 1.553246 | -2.310319 |
| H | 2.683295  | 1.570635 | -3.358658 |
| H | 1.924374  | 0.037440 | -2.926747 |
| H | 3.738018  | 2.993213 | -1.663878 |
| H | 2.480741  | 2.854005 | -0.440680 |
| H | 4.142954  | 2.405616 | -0.052803 |
| C | 0.000080  | 3.363416 | 0.000494  |
| O | 0.108820  | 3.626078 | 1.147753  |
| O | -0.108586 | 3.626561 | -1.146661 |

74

|                                                   |           |           |           |
|---------------------------------------------------|-----------|-----------|-----------|
| 1, TS-3-4 (SMD-BS2-0pt) el energy= -3321.47977818 |           |           |           |
| Ni                                                | -0.012769 | -0.174896 | 0.024466  |
| H                                                 | -0.035600 | -1.759997 | 0.837242  |
| C                                                 | -0.078765 | 1.743917  | 0.004831  |
| C                                                 | 1.057200  | 2.507203  | 0.339230  |
| C                                                 | 2.329030  | 1.799951  | 0.714252  |
| C                                                 | 1.005967  | 3.900728  | 0.345760  |
| H                                                 | 1.896229  | 4.465472  | 0.598623  |
| C                                                 | -0.173428 | 4.565043  | 0.035736  |
| H                                                 | -0.208707 | 5.647497  | 0.043744  |
| C                                                 | -1.309403 | 3.829832  | -0.276405 |
| H                                                 | -2.238500 | 4.338859  | -0.506877 |
| C                                                 | -1.269070 | 2.435985  | -0.293386 |
| C                                                 | -2.507658 | 1.651304  | -0.621887 |
| P                                                 | 2.212797  | 0.074419  | 0.096511  |
| P                                                 | -2.245143 | -0.070452 | -0.039607 |
| C                                                 | 3.201240  | -0.928901 | 1.347542  |
| C                                                 | 2.293730  | -1.098739 | 2.577854  |
| C                                                 | 4.483623  | -0.208784 | 1.788506  |
| C                                                 | 3.560369  | -2.312254 | 0.797222  |
| C                                                 | 3.017755  | 0.107467  | -1.607240 |
| C                                                 | 4.518040  | 0.408349  | -1.555630 |
| C                                                 | 2.783881  | -1.222230 | -2.334216 |
| C                                                 | 2.313086  | 1.213983  | -2.408217 |
| C                                                 | -2.999732 | -0.145700 | 1.682849  |
| C                                                 | -2.424173 | 1.036238  | 2.478494  |
| C                                                 | -2.565167 | -1.441690 | 2.378689  |
| C                                                 | -4.527356 | -0.045003 | 1.681176  |
| C                                                 | -3.171354 | -1.117632 | -1.300034 |
| C                                                 | -4.548093 | -0.535449 | -1.649152 |
| C                                                 | -2.298077 | -1.107066 | -2.566333 |
| C                                                 | -3.340271 | -2.561126 | -0.816545 |
| H                                                 | 3.217664  | 2.317912  | 0.352635  |
| H                                                 | 2.415624  | 1.748427  | 1.801553  |

|   |           |           |           |
|---|-----------|-----------|-----------|
| H | -2.653294 | 1.613057  | -1.702800 |
| H | -3.408007 | 2.098115  | -0.198834 |
| H | 2.877044  | -1.551959 | 3.383709  |
| H | 1.907475  | -0.146226 | 2.945454  |
| H | 1.449749  | -1.752681 | 2.369192  |
| H | 5.173723  | -0.036978 | 0.966460  |
| H | 4.274981  | 0.747573  | 2.267324  |
| H | 4.994783  | -0.836640 | 2.523529  |
| H | 4.320818  | -2.251516 | 0.020094  |
| H | 3.966049  | -2.918919 | 1.611332  |
| H | 2.695011  | -2.837274 | 0.395721  |
| H | 4.882033  | 0.540594  | -2.578534 |
| H | 4.743044  | 1.323471  | -1.006768 |
| H | 5.081436  | -0.410752 | -1.112023 |
| H | 3.317269  | -2.048283 | -1.868918 |
| H | 1.728907  | -1.484220 | -2.361451 |
| H | 3.152043  | -1.124504 | -3.359483 |
| H | 2.472285  | 2.204378  | -1.983256 |
| H | 1.239184  | 1.041430  | -2.476047 |
| H | 2.721887  | 1.215587  | -3.421891 |
| H | -2.779805 | 0.962488  | 3.509464  |
| H | -1.334630 | 1.021691  | 2.493968  |
| H | -2.746564 | 1.999171  | 2.083292  |
| H | -2.894989 | -2.334576 | 1.852265  |
| H | -3.001108 | -1.464050 | 3.381153  |
| H | -1.482249 | -1.492486 | 2.483849  |
| H | -4.873776 | 0.048681  | 2.714236  |
| H | -4.881978 | 0.829498  | 1.134040  |
| H | -4.993948 | -0.933035 | 1.258183  |
| H | -4.481876 | 0.484108  | -2.028107 |
| H | -4.987469 | -1.148968 | -2.440740 |
| H | -5.234848 | -0.545094 | -0.806922 |
| H | -1.333650 | -1.575055 | -2.381182 |
| H | -2.814380 | -1.667572 | -3.350586 |
| H | -2.132248 | -0.095602 | -2.941828 |
| H | -3.753157 | -3.156749 | -1.635361 |
| H | -2.394502 | -3.013942 | -0.526821 |
| H | -4.033628 | -2.629070 | 0.020752  |
| C | 0.074180  | -2.727576 | 0.183528  |
| O | 0.066817  | -3.743348 | 0.874492  |
| O | 0.171006  | -2.544176 | -1.043041 |

74

1, TS-4i-4 (SMD-BS2-Opt) el energy= -3321.50124094  
Ni 0.026572 -0.172664 -0.017138

|   |           |           |           |
|---|-----------|-----------|-----------|
| P | -2.219052 | -0.084375 | 0.068849  |
| P | 2.232745  | 0.128843  | -0.023840 |
| O | 0.255596  | -2.119359 | 0.123897  |
| O | 0.585180  | -3.788599 | -1.341721 |
| C | -3.094573 | -0.997954 | 1.470182  |
| C | -2.114904 | -0.927294 | 2.653713  |
| C | -3.358020 | -2.468332 | 1.142200  |
| C | -4.422163 | -0.341422 | 1.874162  |
| C | -3.056226 | -0.313394 | -1.600251 |
| C | -2.653212 | -1.667411 | -2.195042 |
| C | -4.581222 | -0.200965 | -1.537949 |
| C | -2.509203 | 0.787419  | -2.522835 |
| C | -2.488667 | 1.683304  | 0.492955  |
| C | -1.266421 | 2.454448  | 0.081664  |
| C | -1.334924 | 3.842159  | -0.038328 |
| C | -0.202125 | 4.578692  | -0.358575 |
| C | 1.004071  | 3.919227  | -0.554284 |
| C | 1.078722  | 2.530514  | -0.447704 |
| C | -0.060299 | 1.755419  | -0.136029 |
| C | 2.395843  | 1.838226  | -0.671538 |
| C | 3.286154  | -0.905962 | -1.186664 |
| C | 2.430307  | -1.084090 | -2.452155 |
| C | 4.600481  | -0.210732 | -1.567944 |
| C | 3.593441  | -2.284570 | -0.594775 |
| C | 2.907452  | 0.175022  | 1.731121  |
| C | 2.195804  | 1.328516  | 2.455472  |
| C | 2.539287  | -1.132047 | 2.446025  |
| C | 4.418723  | 0.406587  | 1.798441  |
| C | -0.100460 | -3.147626 | -0.549618 |
| H | -1.186665 | -1.450646 | 2.425064  |
| H | -2.572998 | -1.400782 | 3.526445  |
| H | -1.869861 | 0.100915  | 2.926200  |
| H | -4.073935 | -2.589360 | 0.330400  |
| H | -3.778702 | -2.953132 | 2.027567  |
| H | -2.444057 | -2.996523 | 0.883509  |
| H | -4.830313 | -0.887491 | 2.729459  |
| H | -5.161810 | -0.378629 | 1.077344  |
| H | -4.301357 | 0.696530  | 2.180620  |
| H | -1.573773 | -1.734962 | -2.327354 |
| H | -3.117123 | -1.773025 | -3.179588 |
| H | -2.975363 | -2.508322 | -1.584517 |
| H | -4.905865 | 0.734845  | -1.081252 |
| H | -5.030842 | -1.027108 | -0.989764 |
| H | -4.979247 | -0.225990 | -2.556552 |
| H | -2.907273 | 0.625688  | -3.528069 |



|   |           |           |           |
|---|-----------|-----------|-----------|
| H | -1.420955 | 0.760663  | -2.581453 |
| H | -2.808390 | 1.784923  | -2.202663 |
| H | -3.406772 | 2.082546  | 0.060494  |
| H | -2.602060 | 1.742955  | 1.576694  |
| H | -2.280394 | 4.346682  | 0.127381  |
| H | -0.257458 | 5.656699  | -0.449007 |
| H | 1.897612  | 4.485082  | -0.793717 |
| H | 3.234266  | 2.378860  | -0.229414 |
| H | 2.600779  | 1.765326  | -1.741045 |
| H | 2.109263  | -0.128584 | -2.872179 |
| H | 1.554404  | -1.695556 | -2.245977 |
| H | 3.026914  | -1.595049 | -3.213362 |
| H | 4.436539  | 0.741231  | -2.072675 |
| H | 5.142462  | -0.858316 | -2.263131 |
| H | 5.246286  | -0.035817 | -0.710316 |
| H | 4.068526  | -2.896689 | -1.366932 |
| H | 2.684963  | -2.793004 | -0.281713 |
| H | 4.286148  | -2.218993 | 0.243644  |
| H | 2.437606  | 2.300767  | 2.026714  |
| H | 2.521056  | 1.333696  | 3.499202  |
| H | 1.112811  | 1.209639  | 2.437361  |
| H | 2.838016  | -1.055998 | 3.495375  |
| H | 3.041143  | -1.996601 | 2.017488  |
| H | 1.465980  | -1.315646 | 2.407156  |
| H | 4.711392  | 0.534604  | 2.844739  |
| H | 4.718105  | 1.307118  | 1.260253  |
| H | 4.980342  | -0.437103 | 1.401323  |
| H | -1.129981 | -3.509628 | -0.354018 |
